# Supplementary material for: Impact of DNA source on genetic variant detection from human whole-genome sequencing data
Source: PubMed Central journal article supplement — J Med Genet. 2019 Sep 12;56(12):809–17. doi: 10.1136/jmedgenet-2019-106281 (PMC6929712; doi:10.1136/jmedgenet-2019-106281), 2019-09-12
Supplement: jmedgenet-2019-106281supp001.pdf [file jmedgenet-2019-106281supp001.pdf]

## SUPPLEMENTAL TABLES

Supplemental Table 1: Summary of studies comparing genome-wide variant-detection accuracy from different DNA sources.

| Study                 | Organism | Variant-detection method | Blood | Saliva | Buccal | SNPs | SNVs | Indels | CNVs | Bacterial DNA quantification | Eukaryotic DNA enrichment | Conclusion |
|-----------------------|----------|--------------------------|-------|--------|--------|------|------|--------|------|------------------------------|---------------------------|------------|
| Feigelson et al. 2007 | Human    | CMA                      | Y     | N      | Y      | Y    | N    | N      | N    | N                            | N                         | A          |
| Woo et al. 2007       | Human    | CMA                      | Y     | N      | Y      | Y    | N    | N      | N    | N                            | N                         | A          |
| Bahlo et al. 2010     | Human    | CMA                      | Y     | Y      | N      | Y    | N    | N      | N    | N                            | N                         | B          |
| Loomis et al. 2010    | Human    | CMA                      | Y     | N      | Y      | Y    | N    | N      | N    | N                            | N                         | A          |
| Yokoyama et al. 2010  | Dog      | CMA                      | Y     | Y      | N      | Y    | N    | N      | Y    | N                            | N                         | B          |
| Fabre et al. 2011     | Human    | CMA                      | Y     | Y      | N      | Y    | N    | N      | Y    | N                            | N                         | C          |
| Rincon et al. 2011    | Dog      | CMA                      | Y     | N      | Y      | Y    | N    | N      | Y    | N                            | N                         | A          |
| Abraham et al. 2012   | Human    | CMA                      | Y     | Y      | N      | Y    | N    | N      | N    | N                            | N                         | B          |
| Erickson et al. 2012  | Human    | CMA                      | Y     | N      | Y      | Y    | N    | N      | Y    | N                            | N                         | A          |
| Hu et al. 2012        | Human    | CMA                      | Y     | Y      | N      | Y    | N    | N      | N    | N                            | N                         | C          |
| Pennell et al. 2013   | Human    | CMA                      | Y     | Y      | Y      | Y    | N    | N      | N    | N                            | N                         | D          |
| Gudiseva et al. 2016  | Human    | CMA                      | Y     | Y      | N      | Y    | N    | N      | N    | N                            | N                         | B          |
| Reiner et al. 2017    | Human    | CMA                      | Y     | Y      | N      | Y    | N    | N      | Y    | Y                            | N                         | B          |
| Bruinsma et al. 2018  | Human    | CMA                      | Y     | Y      | N      | Y    | N    | N      | N    | N                            | N                         | B          |
| Wall et al. 2014      | Human    | WES/WGS                  | Y     | Y      | N      | Y    | Y    | N      | N    | N                            | N                         | B          |
| This study            | Human    | WGS                      | Y     | Y      | Y      | Y    | Y    | Y      | Y    | Y                            | Y                         | -          |

Columns containing “Y” (yes) or “N” (no) indicate whether a study examined DNA from blood, saliva, or buccal samples; whether it examined the genotyping of SNPs, SNVs, indels, or CNVs; whether bacterial DNA was quantified; and whether eukaryotic DNA enrichment was examined. Conclusions are coded as follows: A, buccal is as good as blood; B, saliva is as good as blood; C, blood is better than saliva; D, blood and saliva are better than buccal. CMA, chromosomal microarray analysis; WES, whole-exome sequencing; WGS, whole-genome sequencing.

Supplemental Table 2: Age of participants when samples were collected.

| <b>Individual</b> | <b>Age at collection of blood sample (years)</b> | <b>Age at collection of saliva and buccal samples (years)</b> |
|-------------------|--------------------------------------------------|---------------------------------------------------------------|
| PGPC-0002         | 38                                               | 43                                                            |
| PGPC-0005         | 43                                               | 48                                                            |
| PGPC-0006         | 58                                               | 62                                                            |
| PGPC-0050         | 29                                               | 30                                                            |

Supplemental Table 3: Mean and standard deviation of the values for each sample type and sequencing metric, calculated over the four study participants.

| <b>Metric</b>                                      | <b>Blood</b>   | <b>Non-enriched saliva</b> | <b>Enriched saliva</b> | <b>Non-enriched buccal</b> | <b>Enriched buccal</b> |
|----------------------------------------------------|----------------|----------------------------|------------------------|----------------------------|------------------------|
| Percentage of reads aligned                        | 99.8 (0.1)     | 85.3 (10.7)                | 97.2 (2.3)             | 98.4 (0.7)                 | 99.6 (0.2)             |
| Percentage of alignments <50 bp                    | 0.1 (0.0)      | 4.8 (4.3)                  | 0.6 (0.5)              | 0.4 (0.2)                  | 0.1 (0.0)              |
| Mean mapping quality                               | 55.8 (0.2)     | 53.8 (1.7)                 | 54.8 (0.9)             | 55.0 (0.3)                 | 54.9 (0.1)             |
| Median insert size                                 | 337.0 (10.2)   | 307.0 (23.4)               | 315.0 (8.1)            | 312.8 (9.5)                | 313.0 (4.5)            |
| Percentage of reads that are duplicates            | 10.3 (0.7)     | 13.2 (3.6)                 | 14.0 (3.1)             | 12.6 (0.9)                 | 14.5 (3.6)             |
| *Mean sequencing depth (genome-wide)               | 27.8 (0.2)     | 21.5 (4.2)                 | 24.8 (1.7)             | 25.4 (0.6)                 | 25.8 (1.2)             |
| *Mean sequencing depth (mitochondrial genome only) | 1746.6 (260.4) | 2325.5 (640.9)             | 335.7 (345.0)          | 6726.0 (305.7)             | 916.6 (487.0)          |
| Inter-quartile range of sequencing depth           | 10.0 (0.8)     | 8.5 (1.0)                  | 10.8 (2.9)             | 10.0 (2.0)                 | 15.0 (2.2)             |
| *Percentage of positions sequenced to >20x depth   | 74.5 (11.5)    | 65.7 (12.4)                | 71.7 (6.4)             | 74.4 (3.0)                 | 68.3 (3.7)             |
| *Percentage of positions sequenced to >30x depth   | 55.6 (8.9)     | 25.5 (21.6)                | 44.2 (9.2)             | 44.8 (7.0)                 | 45.5 (6.1)             |
| *Percentage of positions sequenced to >40x depth   | 23.4 (17.7)    | 3.3 (4.2)                  | 10.4 (3.0)             | 9.0 (2.8)                  | 19.7 (3.5)             |

Higher values for the inter-quartile range of sequencing depth indicate lower read-depth uniformity. Metrics prefixed with an asterisk were corrected for the total number of reads in a given sample.

Supplemental Table 4: Statistically-significant differences in the distributions of sequencing metrics between blood samples and non-enriched saliva or buccal samples, and between enriched saliva or buccal samples and the corresponding non-enriched samples.

| <b>Metric</b>                                      | <b>Blood versus non-enriched saliva</b> | <b>Blood versus non-enriched buccal</b> | <b>Enriched saliva versus non-enriched saliva</b> | <b>Enriched buccal versus non-enriched buccal</b> |
|----------------------------------------------------|-----------------------------------------|-----------------------------------------|---------------------------------------------------|---------------------------------------------------|
| Percentage of reads aligned                        | 0.000                                   | 0.005                                   | 0.062                                             | 0.062                                             |
| Percentage of alignments <50 bp                    | 0.000                                   | 0.005                                   | 0.062                                             | 0.062                                             |
| Mean mapping quality                               | —                                       | —                                       | 0.125                                             | 0.853                                             |
| Median insert size                                 | —                                       | —                                       | 0.465                                             | 1.0                                               |
| Percentage of reads that are duplicates            | —                                       | —                                       | 0.465                                             | 0.125                                             |
| *Mean sequencing depth (genome-wide)               | 0.003                                   | 0.015                                   | 0.062                                             | 0.465                                             |
| *Mean sequencing depth (mitochondrial genome only) | 0.228                                   | 0.003                                   | 0.062                                             | 0.062                                             |
| *Percentage of positions sequenced to >20x depth   | —                                       | —                                       | 0.125                                             | 0.062                                             |
| *Percentage of positions sequenced to >30x depth   | —                                       | —                                       | 0.062                                             | 0.465                                             |
| *Percentage of positions sequenced to >40x depth   | —                                       | —                                       | 0.062                                             | 0.062                                             |

For blood, non-enriched saliva, and non-enriched buccal samples, a Friedman repeated-measures test was first performed to determine whether there were significant differences among these three sample types. Metrics with Friedman P-value >0.05 are indicated with “—”. For metrics with Friedman P-value  $\leq$  0.05, the P-value from the post-hoc Conover-Iman test is shown. For comparing enriched saliva or buccal samples with the corresponding non-enriched samples, the Wilcoxon signed-rank test was used, with the P-value indicated in the table. For the Wilcoxon test, a P-value of 0.062 was considered significant, as this is the smallest possible P-value when  $n = 4$ . Metrics prefixed with an asterisk were corrected for the total number of reads in a given sample prior to statistical testing.

Supplemental Table 5: BLAST results and mean base-quality scores for 10,000 unmapped reads from each sample.

| Sample                          | Percentage of BLAST hits matching... |           |       |                | Mean base-quality score |
|---------------------------------|--------------------------------------|-----------|-------|----------------|-------------------------|
|                                 | Bacteria                             | Eukaryota | Other | (No BLAST hit) |                         |
| PGPC-0002 (blood)               | 0.3%                                 | 83.4%     | 0.4%  | 15.9%          | 25.8                    |
| PGPC-0002 (non-enriched saliva) | 51.9%                                | 2.0%      | 0.5%  | 45.6%          | 36.8                    |
| PGPC-0002 (enriched saliva)     | 18.3%                                | 2.7%      | 3.2%  | 75.8%          | 27.3                    |
| PGPC-0002 (non-enriched buccal) | 47.0%                                | 8.1%      | 0.3%  | 44.5%          | 33.8                    |
| PGPC-0002 (enriched buccal)     | 14.4%                                | 21.1%     | 2.8%  | 61.7%          | 26.5                    |
| PGPC-0005 (blood)               | 0.1%                                 | 79.2%     | 1.9%  | 18.8%          | 25.6                    |
| PGPC-0005 (non-enriched saliva) | 44.5%                                | 0.7%      | 0.1%  | 54.7%          | 37.5                    |
| PGPC-0005 (enriched saliva)     | 30.8%                                | 0.5%      | 0.7%  | 68.0%          | 34.9                    |
| PGPC-0005 (non-enriched buccal) | 72.5%                                | 3.4%      | 0.7%  | 23.4%          | 36.1                    |
| PGPC-0005 (enriched buccal)     | 43.4%                                | 16.6%     | 1.1%  | 38.9%          | 31.4                    |
| PGPC-0006 (blood)               | 0.2%                                 | 82.4%     | 0.2%  | 17.2%          | 25.7                    |
| PGPC-0006 (non-enriched saliva) | 60.5%                                | 1.0%      | 0.3%  | 38.2%          | 37.3                    |
| PGPC-0006 (enriched saliva)     | 31.1%                                | 4.1%      | 0.6%  | 64.2%          | 30.6                    |
| PGPC-0006 (non-enriched buccal) | 78.7%                                | 2.9%      | 1.5%  | 17.0%          | 37.0                    |
| PGPC-0006 (enriched buccal)     | 30.6%                                | 7.9%      | 1.5%  | 60.0%          | 28.4                    |
| PGPC-0050 (blood)               | 0.2%                                 | 72.9%     | 5.8%  | 21.1%          | 26.3                    |
| PGPC-0050 (non-enriched saliva) | 60.8%                                | 0.7%      | 0.2%  | 38.2%          | 37.7                    |
| PGPC-0050 (enriched saliva)     | 53.8%                                | 2.0%      | 0.4%  | 43.9%          | 35.5                    |
| PGPC-0050 (non-enriched buccal) | 43.9%                                | 7.5%      | 1.6%  | 47.0%          | 30.3                    |
| PGPC-0050 (enriched buccal)     | 44.9%                                | 22.3%     | 3.0%  | 29.9%          | 31.9                    |

Supplemental Table 6: Number of known and novel SNVs and indels detected in each sample both before and after filtering.

| Sample                          | Before filtering |                | After filtering |                |
|---------------------------------|------------------|----------------|-----------------|----------------|
|                                 | Known variants   | Novel variants | Known variants  | Novel variants |
| SNVs                            |                  |                |                 |                |
| HuRef (blood 1)                 | 3735426          | 51311          | 3604318         | 30513          |
| HuRef (blood 2)                 | 3738089          | 51960          | 3530091         | 20072          |
| PGPC-0002 (blood)               | 3758148          | 52072          | 3631494         | 32066          |
| PGPC-0002 (non-enriched saliva) | 3751290          | 52137          | 3619413         | 30333          |
| PGPC-0002 (enriched saliva)     | 3751555          | 51776          | 3633447         | 34612          |
| PGPC-0002 (non-enriched buccal) | 3749332          | 65094          | 3625655         | 46581          |
| PGPC-0002 (enriched buccal)     | 3747049          | 52235          | 3558352         | 26128          |
| PGPC-0005 (blood)               | 3763060          | 51068          | 3637246         | 32770          |
| PGPC-0005 (non-enriched saliva) | 3755741          | 64249          | 3638593         | 45634          |
| PGPC-0005 (enriched saliva)     | 3761199          | 51887          | 3638540         | 34045          |
| PGPC-0005 (non-enriched buccal) | 3759176          | 52507          | 3606760         | 26486          |
| PGPC-0005 (enriched buccal)     | 3760032          | 51326          | 3632810         | 34504          |
| PGPC-0006 (blood)               | 3791306          | 47362          | 3663978         | 29276          |
| PGPC-0006 (non-enriched saliva) | 3789490          | 49466          | 3666675         | 30617          |
| PGPC-0006 (enriched saliva)     | 3787068          | 46846          | 3674442         | 29909          |
| PGPC-0006 (non-enriched buccal) | 3790856          | 65890          | 3668556         | 46690          |
| PGPC-0006 (enriched buccal)     | 3787712          | 46318          | 3662284         | 32383          |
| PGPC-0050 (blood)               | 3744699          | 61662          | 3612079         | 40774          |
| PGPC-0050 (non-enriched saliva) | 3742340          | 75658          | 3638365         | 57616          |
| PGPC-0050 (enriched saliva)     | 3732870          | 62149          | 3614610         | 47013          |
| PGPC-0050 (non-enriched buccal) | 3742896          | 76092          | 3618312         | 58060          |
| PGPC-0050 (enriched buccal)     | 3753009          | 62334          | 3632516         | 45149          |
| Indels                          |                  |                |                 |                |
| HuRef (blood 1)                 | 784131           | 59780          | 221427          | 3140           |
| HuRef (blood 2)                 | 792645           | 63920          | 223383          | 3380           |
| PGPC-0002 (blood)               | 783941           | 58499          | 220715          | 3242           |
| PGPC-0002 (non-enriched saliva) | 776354           | 57939          | 224607          | 3424           |
| PGPC-0002 (enriched saliva)     | 784950           | 58074          | 223559          | 3479           |
| PGPC-0002 (non-enriched buccal) | 784814           | 59170          | 221124          | 3427           |
| PGPC-0002 (enriched buccal)     | 793303           | 62579          | 219572          | 3330           |
| PGPC-0005 (blood)               | 786065           | 59261          | 222524          | 3339           |
| PGPC-0005 (non-enriched saliva) | 778716           | 114745         | 223409          | 3256           |
| PGPC-0005 (enriched saliva)     | 792151           | 65465          | 224568          | 3436           |
| PGPC-0005 (non-enriched buccal) | 784059           | 59917          | 223916          | 3303           |
| PGPC-0005 (enriched buccal)     | 797013           | 62695          | 223633          | 3407           |
| PGPC-0006 (blood)               | 790455           | 57424          | 220864          | 2950           |
| PGPC-0006 (non-enriched saliva) | 792593           | 68544          | 226099          | 3269           |
| PGPC-0006 (enriched saliva)     | 794109           | 58801          | 225231          | 3181           |
| PGPC-0006 (non-enriched buccal) | 796330           | 62686          | 225128          | 3256           |
| PGPC-0006 (enriched buccal)     | 808146           | 64177          | 223346          | 3225           |
| PGPC-0050 (blood)               | 784458           | 60909          | 221209          | 3860           |
| PGPC-0050 (non-enriched saliva) | 790086           | 114347         | 222866          | 4000           |
| PGPC-0050 (enriched saliva)     | 785422           | 68412          | 218964          | 4055           |
| PGPC-0050 (non-enriched buccal) | 786786           | 63034          | 223073          | 4092           |
| PGPC-0050 (enriched buccal)     | 807396           | 68010          | 223414          | 4223           |

Supplemental Table 7: Descriptive statistics for the allele fraction distributions in each sample type (blood, saliva without enrichment, saliva with enrichment, buccal without enrichment, and buccal with enrichment) for heterozygous SNVs, homozygous SNVs, heterozygous indels, and homozygous indels.

| Variant type                   | Blood         | Non-enriched saliva | Enriched saliva | Non-enriched buccal | Enriched buccal |
|--------------------------------|---------------|---------------------|-----------------|---------------------|-----------------|
| Per-sample means               |               |                     |                 |                     |                 |
| Heterozygous SNVs              | 0.495 (0.001) | 0.493 (0.002)       | 0.494 (0.000)   | 0.493 (0.003)       | 0.495 (0.002)   |
| Homozygous SNVs                | 0.998 (0.001) | 0.999 (0.000)       | 0.999 (0.000)   | 0.999 (0.000)       | 0.999 (0.000)   |
| Heterozygous indels            | 0.513 (0.002) | 0.508 (0.002)       | 0.508 (0.001)   | 0.508 (0.001)       | 0.507 (0.001)   |
| Homozygous indels              | 0.974 (0.001) | 0.975 (0.002)       | 0.975 (0.001)   | 0.974 (0.001)       | 0.973 (0.001)   |
| Per-sample standard deviations |               |                     |                 |                     |                 |
| Heterozygous SNVs              | 0.122 (0.002) | 0.123 (0.003)       | 0.123 (0.002)   | 0.124 (0.004)       | 0.123 (0.002)   |
| Homozygous SNVs                | 0.012 (0.003) | 0.008 (0.000)       | 0.009 (0.000)   | 0.009 (0.000)       | 0.009 (0.001)   |
| Heterozygous indels            | 0.151 (0.003) | 0.149 (0.001)       | 0.150 (0.000)   | 0.150 (0.001)       | 0.149 (0.001)   |
| Homozygous indels              | 0.105 (0.002) | 0.105 (0.002)       | 0.105 (0.001)   | 0.107 (0.002)       | 0.110 (0.002)   |

The mean and standard deviation of the allele fractions were calculated for each variant type in each sample. Means and standard deviations of the per-sample means and standard deviations were then computed for each sample type (over the four study participants). For heterozygous SNVs detected in blood, for instance, the mean allele fractions for individuals PGPC-0002, PGPC-0005, PGPC-0006, and PGPC-0050 were 0.494, 0.495, 0.495, and 0.495, respectively; the mean and standard deviations of these values are 0.495 and 0.001, respectively. Similarly, the standard deviations of the heterozygous SNV allele fractions for individuals PGPC-0002, PGPC-0005, PGPC-0006, and PGPC-0050 were 0.123, 0.122, 0.124, and 0.119, respectively; the mean and standard deviation of these values are 0.122 and 0.002.

Supplemental Table 8: SNV- and indel-detection concordance between blood samples and non-enriched saliva or buccal samples, and between enriched saliva or buccal samples and the corresponding non-enriched samples, for filtered, known SNVs and indels (those present in gnomAD) in coding exons, all exons, introns, and intergenic regions.

|                 |                     | Concordant   | Unique to sample type 1 | Unique to sample type 2 | Concordant | Unique to sample type 1 | Unique to sample type 2 | Concordant | Unique to sample type 1 | Unique to sample type 2 | Concordant         | Unique to sample type 1 | Unique to sample type 2 |
|-----------------|---------------------|--------------|-------------------------|-------------------------|------------|-------------------------|-------------------------|------------|-------------------------|-------------------------|--------------------|-------------------------|-------------------------|
| Sample Type 1   | Sample Type 2       | Coding exons |                         |                         | All exons  |                         |                         | Introns    |                         |                         | Intergenic regions |                         |                         |
| SNVs            |                     |              |                         |                         |            |                         |                         |            |                         |                         |                    |                         |                         |
| HuRef Blood 1   | HuRef Blood 2       | 94.7         | 4.2                     | 1.0                     | 95.4       | 3.6                     | 1.1                     | 95.6       | 3.0                     | 1.4                     | 94.2               | 4.0                     | 1.7                     |
| Blood           | Non-enriched saliva | 96.2         | 1.7                     | 2.1                     | 96.7       | 1.5                     | 1.8                     | 96.8       | 1.6                     | 1.6                     | 96.1               | 1.8                     | 2.0                     |
| Blood           | Non-enriched buccal | 96.1         | 2.0                     | 1.9                     | 96.5       | 1.7                     | 1.7                     | 96.6       | 1.8                     | 1.6                     | 95.7               | 2.2                     | 2.0                     |
| Enriched saliva | Non-enriched saliva | 96.3         | 1.8                     | 1.9                     | 96.9       | 1.5                     | 1.6                     | 97.2       | 1.4                     | 1.4                     | 96.5               | 1.7                     | 1.8                     |
| Enriched buccal | Non-enriched buccal | 96.2         | 1.7                     | 2.1                     | 96.5       | 1.6                     | 1.9                     | 96.7       | 1.6                     | 1.7                     | 95.7               | 2.0                     | 2.3                     |
| Indels          |                     |              |                         |                         |            |                         |                         |            |                         |                         |                    |                         |                         |
| HuRef Blood 1   | HuRef Blood 2       | 85.7         | 6.9                     | 7.4                     | 89.3       | 5.3                     | 5.4                     | 87.6       | 5.9                     | 6.5                     | 87.3               | 5.9                     | 6.9                     |
| Blood           | Non-enriched saliva | 80.2         | 10.1                    | 9.7                     | 87.4       | 5.9                     | 6.7                     | 87.3       | 5.9                     | 6.9                     | 86.7               | 5.9                     | 7.4                     |
| Blood           | Non-enriched buccal | 81.4         | 7.7                     | 10.9                    | 87.0       | 5.9                     | 7.0                     | 86.9       | 6.2                     | 7.0                     | 86.0               | 6.6                     | 7.4                     |
| Enriched saliva | Non-enriched saliva | 81.9         | 10.4                    | 7.7                     | 87.8       | 6.4                     | 5.8                     | 87.6       | 6.1                     | 6.3                     | 86.8               | 6.2                     | 7.0                     |
| Enriched buccal | Non-enriched buccal | 82.5         | 8.2                     | 9.4                     | 87.5       | 6.4                     | 6.0                     | 87.2       | 6.5                     | 6.4                     | 85.8               | 6.8                     | 7.5                     |

For further details, see Table 1.



Supplemental Table 9: SNV- and indel-detection concordance between blood samples and non-enriched saliva or buccal samples, and between enriched saliva or buccal samples and the corresponding non-enriched samples, for filtered, novel SNVs and indels (those not present in gnomAD) in coding exons, all exons, introns, and intergenic regions.

|                 |                     | Coding exons |                         |                         | All exons  |                         |                         | Introns    |                         |                         | Intergenic regions |                         |                         |
|-----------------|---------------------|--------------|-------------------------|-------------------------|------------|-------------------------|-------------------------|------------|-------------------------|-------------------------|--------------------|-------------------------|-------------------------|
| Sample Type 1   | Sample Type 2       | Concordant   | Unique to sample type 1 | Unique to sample type 2 | Concordant | Unique to sample type 1 | Unique to sample type 2 | Concordant | Unique to sample type 1 | Unique to sample type 2 | Concordant         | Unique to sample type 1 | Unique to sample type 2 |
| SNVs            |                     |              |                         |                         |            |                         |                         |            |                         |                         |                    |                         |                         |
| HuRef Blood 1   | HuRef Blood 2       | 84.8         | 9.1                     | 6.1                     | 65.5       | 29.5                    | 5.0                     | 57.4       | 33.9                    | 8.7                     | 50.2               | 41.9                    | 7.8                     |
| Blood           | Non-enriched saliva | 17.5         | 2.3                     | 80.2                    | 44.4       | 7.2                     | 48.3                    | 56.3       | 11.6                    | 32.0                    | 56.9               | 15.2                    | 27.8                    |
| Blood           | Non-enriched buccal | 57.6         | 8.4                     | 34.0                    | 64.7       | 12.5                    | 22.8                    | 50.7       | 12.6                    | 36.7                    | 49.1               | 15.9                    | 35.0                    |
| Enriched saliva | Non-enriched saliva | 17.8         | 5.4                     | 76.8                    | 43.5       | 11.5                    | 45.0                    | 56.4       | 13.9                    | 29.7                    | 57.1               | 18.4                    | 24.6                    |
| Enriched buccal | Non-enriched buccal | 51.3         | 19.0                    | 29.7                    | 61.9       | 16.3                    | 21.9                    | 49.7       | 14.0                    | 36.3                    | 48.3               | 17.2                    | 34.5                    |
| Indels          |                     |              |                         |                         |            |                         |                         |            |                         |                         |                    |                         |                         |
| HuRef Blood 1   | HuRef Blood 2       | 85.7         | 0.0                     | 14.3                    | 70.8       | 11.1                    | 18.1                    | 67.4       | 14.3                    | 18.3                    | 64.1               | 14.3                    | 21.7                    |
| Blood           | Non-enriched saliva | 70.3         | 10.8                    | 18.9                    | 70.0       | 12.4                    | 17.6                    | 65.0       | 17.0                    | 18.0                    | 62.2               | 16.5                    | 21.3                    |
| Blood           | Non-enriched buccal | 67.6         | 13.5                    | 18.9                    | 69.7       | 12.7                    | 17.6                    | 64.5       | 16.9                    | 18.6                    | 62.6               | 15.9                    | 21.5                    |
| Enriched saliva | Non-enriched saliva | 81.1         | 10.8                    | 8.1                     | 72.8       | 13.8                    | 13.5                    | 64.8       | 18.3                    | 16.9                    | 62.2               | 19.4                    | 18.4                    |
| Enriched buccal | Non-enriched buccal | 70.0         | 20.0                    | 10.0                    | 71.1       | 14.9                    | 14.0                    | 65.9       | 18.1                    | 16.0                    | 63.5               | 18.1                    | 18.4                    |

Note that there were very few novel indels detected in coding exons – the raw counts for the number of concordant novel indels in coding exons was 6, 26, 25, 30, and 28 for HuRef Blood 1 versus HuRef Blood 2, blood versus non-enriched saliva, blood versus non-enriched buccal, enriched saliva versus non-enriched saliva, and enriched buccal versus non-enriched buccal, respectively. For further details, see Table 1.

Supplemental Table 10: Accuracy of discordant SNVs and indels.

|                 |                     | Unique to sample type 1 | Unique to sample type 2 | Unique to sample type 1 | Unique to sample type 1 |
|-----------------|---------------------|-------------------------|-------------------------|-------------------------|-------------------------|
| Sample Type 1   | Sample Type 2       | Known                   |                         | Novel                   |                         |
| SNVs            |                     |                         |                         |                         |                         |
| Blood           | Non-enriched saliva | 6/13                    | 5/12                    | 0/12                    | 2/13                    |
| Blood           | Non-enriched buccal | 8/15                    | 5/11                    | 2/10                    | 2/14                    |
| Enriched saliva | Non-enriched saliva | 5/15                    | 1/10                    | 2/10                    | 3/15                    |
| Enriched buccal | Non-enriched buccal | 4/8                     | 5/10                    | 6/17                    | 3/15                    |
| Indels          |                     |                         |                         |                         |                         |
| Blood           | Non-enriched saliva | 11/13                   | 11/13                   | 8/12                    | 7/12                    |
| Blood           | Non-enriched buccal | 12/15                   | 8/13                    | 6/10                    | 11/12                   |
| Enriched saliva | Non-enriched saliva | 9/12                    | 10/14                   | 9/13                    | 3/11                    |
| Enriched buccal | Non-enriched buccal | 11/13                   | 9/11                    | 7/12                    | 9/14                    |

A total of 200 SNVs and 200 indels detected in one sample type but not a second sample type were visually inspected in Integrative Genomics Viewer to determine their correctness. The “unique to sample type 1” columns are of the form  $X/Y$ , where  $X$  is the number of variants detected in sample type 1 but not sample type 2 that were deemed correct by visual confirmation and  $Y$  is the total number inspected (and analogously for the “unique to sample type 2” columns). After correcting for multiple hypothesis testing (Bonferroni), none of the comparisons was statistically significant in terms of having a greater proportion of variants unique to sample type 1 deemed correct than sample type 2 or vice versa ( $\chi^2$  test). A small number of variants were difficult to verify and thus are omitted from the table, which is why the total of the denominators is less than 400.

Supplemental Table 11: Number of reads supporting the alternate and reference alleles for the variant chrMT.12684G>A, which is one of the SNVs comprising a SNV cluster found in the enriched saliva samples from PGPC-0002 and PGPC-0005 but not any of the other sample types from these individuals.

| Sample                          | Number of reads supporting alternate allele | Number of reads supporting reference allele |
|---------------------------------|---------------------------------------------|---------------------------------------------|
| PGPC-0002 (blood)               | 36                                          | 3083                                        |
| PGPC-0002 (non-enriched saliva) | 18                                          | 2326                                        |
| PGPC-0002 (enriched saliva)     | 19                                          | 63                                          |
| PGPC-0002 (non-enriched buccal) | 22                                          | 10269                                       |
| PGPC-0002 (enriched buccal)     | 23                                          | 1113                                        |
| PGPC-0005 (blood)               | 24                                          | 1486                                        |
| PGPC-0005 (non-enriched saliva) | 26                                          | 2568                                        |
| PGPC-0005 (enriched saliva)     | 34                                          | 132                                         |
| PGPC-0005 (non-enriched buccal) | 25                                          | 9387                                        |
| PGPC-0005 (enriched buccal)     | 50                                          | 378                                         |
| PGPC-0006 (blood)               | 25                                          | 2029                                        |
| PGPC-0006 (non-enriched saliva) | 13                                          | 2579                                        |
| PGPC-0006 (enriched saliva)     | 16                                          | 420                                         |
| PGPC-0006 (non-enriched buccal) | 13                                          | 9178                                        |
| PGPC-0006 (enriched buccal)     | 12                                          | 1977                                        |
| PGPC-0050 (blood)               | 11                                          | 1866                                        |
| PGPC-0050 (non-enriched saliva) | 20                                          | 4432                                        |
| PGPC-0050 (enriched saliva)     | 26                                          | 1000                                        |
| PGPC-0050 (non-enriched buccal) | 27                                          | 9486                                        |
| PGPC-0050 (enriched buccal)     | 29                                          | 1218                                        |

Highlighted cells indicate samples in which the variant was detected by the Genome Analysis Toolkit; these include the enriched buccal sample from PGPC-0005, even though most other SNVs comprising the clusters were not detected in this sample.

Supplemental Table 12: Number of common and rare CNVs detected in each sample using the ERDS and CNVnator-based workflow.

| Sample                          | Number of common CNVs | Number of rare CNVs |
|---------------------------------|-----------------------|---------------------|
| Deletions                       |                       |                     |
| HuRef (blood 1)                 | 379                   | 7                   |
| HuRef (blood 2)                 | 362                   | 7                   |
| PGPC-0002 (blood)               | 312                   | 13                  |
| PGPC-0002 (non-enriched saliva) | 295                   | 12                  |
| PGPC-0002 (enriched saliva)     | 276                   | 11                  |
| PGPC-0002 (non-enriched buccal) | 208                   | 7                   |
| PGPC-0002 (enriched buccal)     | 68                    | 3                   |
| PGPC-0005 (blood)               | 309                   | 10                  |
| PGPC-0005 (non-enriched saliva) | 210                   | 7                   |
| PGPC-0005 (enriched saliva)     | 250                   | 7                   |
| PGPC-0005 (non-enriched buccal) | 282                   | 10                  |
| PGPC-0005 (enriched buccal)     | 139                   | 6                   |
| PGPC-0006 (blood)               | 264                   | 11                  |
| PGPC-0006 (non-enriched saliva) | 269                   | 12                  |
| PGPC-0006 (enriched saliva)     | 236                   | 13                  |
| PGPC-0006 (non-enriched buccal) | 249                   | 11                  |
| PGPC-0006 (enriched buccal)     | 70                    | 2                   |
| PGPC-0050 (blood)               | 270                   | 15                  |
| PGPC-0050 (non-enriched saliva) | 193                   | 12                  |
| PGPC-0050 (enriched saliva)     | 54                    | 2                   |
| PGPC-0050 (non-enriched buccal) | 247                   | 15                  |
| PGPC-0050 (enriched buccal)     | 144                   | 10                  |
| Duplications                    |                       |                     |
| HuRef (blood 1)                 | 109                   | 4                   |
| HuRef (blood 2)                 | 117                   | 4                   |
| PGPC-0002 (blood)               | 90                    | 4                   |
| PGPC-0002 (non-enriched saliva) | 83                    | 4                   |
| PGPC-0002 (enriched saliva)     | 87                    | 4                   |
| PGPC-0002 (non-enriched buccal) | 79                    | 4                   |
| PGPC-0002 (enriched buccal)     | 36                    | 4                   |
| PGPC-0005 (blood)               | 101                   | 2                   |
| PGPC-0005 (non-enriched saliva) | 99                    | 2                   |
| PGPC-0005 (enriched saliva)     | 91                    | 4                   |
| PGPC-0005 (non-enriched buccal) | 101                   | 3                   |
| PGPC-0005 (enriched buccal)     | 75                    | 3                   |
| PGPC-0006 (blood)               | 83                    | 3                   |
| PGPC-0006 (non-enriched saliva) | 83                    | 0                   |
| PGPC-0006 (enriched saliva)     | 80                    | 1                   |
| PGPC-0006 (non-enriched buccal) | 89                    | 3                   |
| PGPC-0006 (enriched buccal)     | 45                    | 2                   |
| PGPC-0050 (blood)               | 88                    | 7                   |
| PGPC-0050 (non-enriched saliva) | 75                    | 7                   |
| PGPC-0050 (enriched saliva)     | 28                    | 4                   |
| PGPC-0050 (non-enriched buccal) | 82                    | 9                   |
| PGPC-0050 (enriched buccal)     | 62                    | 5                   |

Supplemental Table 13: Concordance between blood samples and non-enriched saliva or buccal samples, and between enriched saliva or buccal samples and the corresponding non-enriched samples, for rare CNVs (those with <1% frequency in MSSNG parents).

|                 |                     | [1 kb,5 kb] |                         |                         | [5 kb,10 kb] |                         |                         | [10 kb,...] |                         |                         |
|-----------------|---------------------|-------------|-------------------------|-------------------------|--------------|-------------------------|-------------------------|-------------|-------------------------|-------------------------|
| Sample type 1   | Sample type 2       | Concordant  | Unique to sample type 1 | Unique to sample type 2 | Concordant   | Unique to sample type 1 | Unique to sample type 2 | Concordant  | Unique to sample type 1 | Unique to sample type 2 |
| Deletions       |                     |             |                         |                         |              |                         |                         |             |                         |                         |
| HuRef Blood 1   | HuRef Blood 2       | 1           | 1/1                     | 0/0                     | 1            | 0/0                     | 0/0                     | 3           | 0/0                     | 0/0                     |
| Blood           | Non-enriched saliva | 10          | 12/12                   | 7/8                     | 14           | 2/2                     | 0/0                     | 11          | 0/0                     | 0/0                     |
| Blood           | Non-enriched buccal | 13          | 9/9                     | 3/3                     | 14           | 2/2                     | 3/3                     | 10          | 1/1                     | 0/0                     |
| Enriched saliva | Non-enriched saliva | 6           | 6/6                     | 11/12                   | 9            | 2/2                     | 5/5                     | 8           | 0/2                     | 3/3                     |
| Enriched buccal | Non-enriched buccal | 3           | 0/0                     | 13/13                   | 5            | 0/1                     | 11/12                   | 2           | 0/10                    | 8/8                     |
| Duplications    |                     |             |                         |                         |              |                         |                         |             |                         |                         |
| HuRef Blood 1   | HuRef Blood 2       | 0           | 0/0                     | 0/0                     | 0            | 0/0                     | 0/0                     | 3           | 0/0                     | 0/0                     |
| Blood           | Non-enriched saliva | 2           | 1/1                     | 0/0                     | 1            | 2/2                     | 0/1                     | 9           | 1/1                     | 0/0                     |
| Blood           | Non-enriched buccal | 2           | 1/1                     | 0/7                     | 2            | 1/1                     | 0/0                     | 8           | 2/2                     | 0/0                     |
| Enriched saliva | Non-enriched saliva | 2           | 0/1                     | 0/0                     | 0            | 0/2                     | 1/2                     | 5           | 0/3                     | 4/4                     |
| Enriched buccal | Non-enriched buccal | 1           | 0/0                     | 2/9                     | 0            | 0/0                     | 1/1                     | 7           | 0/6                     | 1/1                     |

For each rare CNV that was discordant between two sample types, we used visual inspection of alignments to classify it as true or false. The “concordant” columns contain the number of CNVs detected in both sample type 1 and sample type 2. The “unique to sample type 1” columns are of the form  $X/Y$ , where  $X$  is the number of CNVs detected in sample type 1 but not sample type 2 that were verified as correct and  $Y$  is the total number of such CNVs (and analogously for the “unique to sample type 2” column). For example, 13 out of the 13 rare deletions between 1 and 5 kb detected in non-enriched buccal samples but not in enriched buccal samples were deemed to be correct by visual inspection of alignments. Larger values of  $X$  indicate greater sensitivity, while larger values of  $Y - X$  denote higher false discovery rates. Except for the HuRef blood comparison, all values are after aggregating across individuals; for individual-specific data, see Additional File 4.

Supplemental Table 14: Statistically-significant differences in the distributions of the number of CNVs detected between blood samples and non-enriched saliva or buccal samples, and between enriched saliva or buccal samples and the corresponding non-enriched samples.

| <b>Metric</b>                    | <b>Blood versus non-enriched saliva</b> | <b>Blood versus non-enriched buccal</b> | <b>Enriched saliva versus non-enriched saliva</b> | <b>Enriched buccal versus non-enriched buccal</b> |
|----------------------------------|-----------------------------------------|-----------------------------------------|---------------------------------------------------|---------------------------------------------------|
| Common deletions [1 kb,5 kb)     | —                                       | —                                       | 0.125                                             | 0.062                                             |
| Common deletions [5 kb,10 kb)    | —                                       | —                                       | 0.854                                             | 0.062                                             |
| Common deletions [10 kb,...)     | 0.004                                   | 0.512                                   | 0.715                                             | 0.062                                             |
| Common duplications [1 kb,5 kb)  | —                                       | —                                       | 0.125                                             | 0.062                                             |
| Common duplications [5 kb,10 kb) | —                                       | —                                       | 0.062                                             | 0.062                                             |
| Common duplications [10 kb,...)  | —                                       | —                                       | 0.854                                             | 0.125                                             |

For blood, non-enriched saliva, and non-enriched buccal samples, a Friedman repeated-measures test was first performed to determine whether there were significant differences among these three sample types. Metrics with Friedman P-value  $>0.05$  are indicated with “—”. For metrics with Friedman P-value  $\leq 0.05$ , the P-value from the post-hoc Conover-Iman test is shown. For comparing enriched saliva and buccal samples with the corresponding non-enriched samples, the Wilcoxon signed-rank test was used, with the P-value indicated in the table. For the Wilcoxon test, a P-value of 0.062 was considered significant, as this is the smallest possible P-value with  $n = 4$ .

Supplemental Table 15: Consistency of CNVs detected by Canvas in the five sample types with those detected by the ERDS and CNVnator-based CNV-detection workflow in blood samples.

| Sample type         | [1 kb,5 kb) | [5 kb,10 kb) | [10 kb,...) |
|---------------------|-------------|--------------|-------------|
| Deletions           |             |              |             |
| Blood               | 15/22       | 33/42        | 56/80       |
| Non-enriched saliva | 15/27       | 35/39        | 51/75       |
| Enriched saliva     | 3/4         | 16/20        | 36/63       |
| Non-enriched buccal | 9/16        | 26/34        | 43/70       |
| Enriched buccal     | 0/1         | 2/2          | 21/145      |
| Duplications        |             |              |             |
| Blood               | 2/22        | 6/26         | 18/66       |
| Non-enriched saliva | 3/27        | 6/16         | 17/73       |
| Enriched saliva     | 1/23        | 2/22         | 12/66       |
| Non-enriched buccal | 0/20        | 4/21         | 19/71       |
| Enriched buccal     | 0/14        | 0/5          | 9/48        |

Each cell is of the form  $X/Y$ , where  $Y$  is the total number of CNVs detected and  $X$  is the number of those that were also detected by the ERDS and CNVnator-based workflow in the blood sample from the same individual. For example, across the four individuals, 27 CNVs between 1 and 5 kb were detected by Canvas in a non-enriched saliva sample, 15 of which were also detected by our ERDS/CNVnator workflow in the blood sample from the same individual. Larger values of  $X$  indicate greater sensitivity, while larger values of  $Y - X$  denote higher false discovery rates. All values are after aggregating across individuals; for individual-specific data, see Additional File 4.

Supplemental Table 16: Number of structural variants of each type detected by Manta in each sample.

| Sample                          | Deletions [1 kb,5 kb) | Deletions [5 kb,10 kb) | Deletions [10 kb,...) | Duplications [1 kb,5 kb) | Duplications [5 kb,10 kb) | Duplications [10 kb,...) | Inversions | Insertions | Breakends |
|---------------------------------|-----------------------|------------------------|-----------------------|--------------------------|---------------------------|--------------------------|------------|------------|-----------|
| PGPC-0002 (blood)               | 461                   | 126                    | 196                   | 57                       | 16                        | 164                      | 462        | 1417       | 3108      |
| PGPC-0002 (non-enriched saliva) | 444                   | 123                    | 188                   | 67                       | 15                        | 142                      | 438        | 1356       | 3040      |
| PGPC-0002 (enriched saliva)     | 424                   | 122                    | 158                   | 71                       | 12                        | 141                      | 402        | 1352       | 2988      |
| PGPC-0002 (non-enriched buccal) | 397                   | 116                    | 137                   | 48                       | 13                        | 108                      | 365        | 1373       | 2826      |
| PGPC-0002 (enriched buccal)     | 421                   | 119                    | 166                   | 57                       | 12                        | 136                      | 361        | 1713       | 3142      |
| PGPC-0005 (blood)               | 446                   | 125                    | 185                   | 70                       | 14                        | 167                      | 467        | 1391       | 3204      |
| PGPC-0005 (non-enriched saliva) | 415                   | 122                    | 169                   | 71                       | 19                        | 154                      | 404        | 1244       | 2874      |
| PGPC-0005 (enriched saliva)     | 417                   | 117                    | 183                   | 66                       | 18                        | 162                      | 416        | 1509       | 3106      |
| PGPC-0005 (non-enriched buccal) | 415                   | 129                    | 172                   | 69                       | 17                        | 163                      | 437        | 1362       | 3044      |
| PGPC-0005 (enriched buccal)     | 418                   | 127                    | 157                   | 62                       | 17                        | 140                      | 396        | 1611       | 3032      |
| PGPC-0006 (blood)               | 440                   | 123                    | 194                   | 74                       | 14                        | 157                      | 417        | 1289       | 3028      |
| PGPC-0006 (non-enriched saliva) | 437                   | 130                    | 173                   | 74                       | 15                        | 146                      | 434        | 1406       | 3014      |
| PGPC-0006 (enriched saliva)     | 426                   | 122                    | 175                   | 64                       | 19                        | 149                      | 419        | 1471       | 2972      |
| PGPC-0006 (non-enriched buccal) | 416                   | 120                    | 163                   | 65                       | 13                        | 117                      | 396        | 1428       | 2896      |
| PGPC-0006 (enriched buccal)     | 443                   | 123                    | 169                   | 60                       | 19                        | 127                      | 407        | 1843       | 3160      |
| PGPC-0050 (blood)               | 425                   | 132                    | 199                   | 73                       | 16                        | 160                      | 403        | 1408       | 3134      |
| PGPC-0050 (non-enriched saliva) | 395                   | 121                    | 169                   | 56                       | 12                        | 129                      | 344        | 1233       | 2782      |
| PGPC-0050 (enriched saliva)     | 412                   | 120                    | 146                   | 61                       | 18                        | 130                      | 380        | 1613       | 3112      |
| PGPC-0050 (non-enriched buccal) | 416                   | 133                    | 181                   | 68                       | 13                        | 131                      | 369        | 1394       | 2956      |
| PGPC-0050 (enriched buccal)     | 412                   | 128                    | 147                   | 56                       | 15                        | 127                      | 379        | 1639       | 3028      |

Counts for deletions and duplications are stratified by size (between 1 and 5 kb, between 5 and 10 kb, and >10 kb), whereas counts for inversions, insertions, and breakends are not.



## SUPPLEMENTAL FIGURES

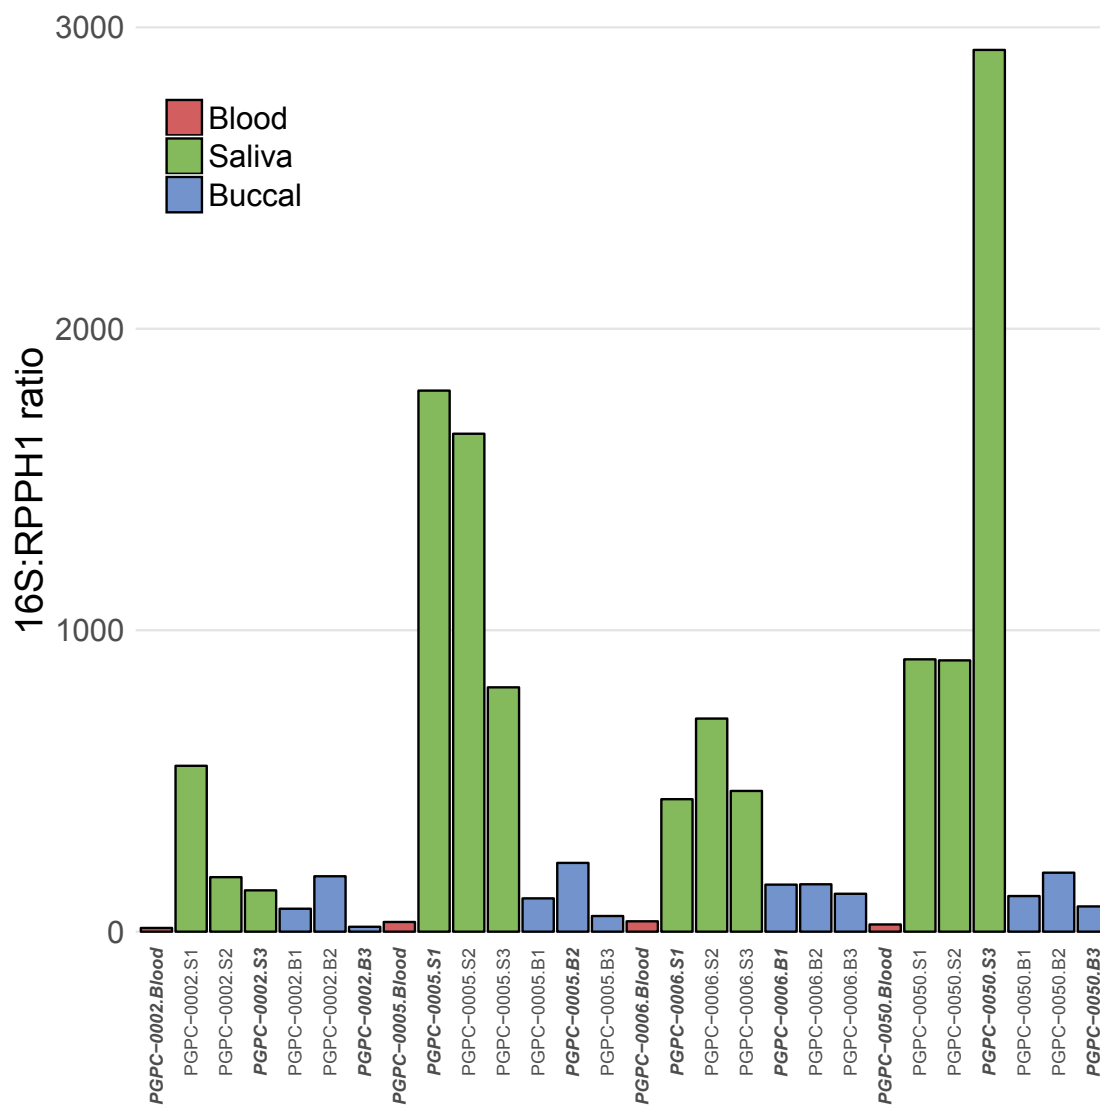

Supplemental Figure 1: Bacterial DNA quantification. One blood, three saliva (S1, S2, and S3), and three buccal (B1, B2, and B3) samples were collected from each of four individuals (PGPC-0002, PGPC-0005, PGPC-0006, and PGPC-0050), and their concentrations of bacterial DNA quantified. Higher 16S:RPPH1 ratios indicate higher bacterial DNA concentrations. Samples in bold were selected for further analysis.

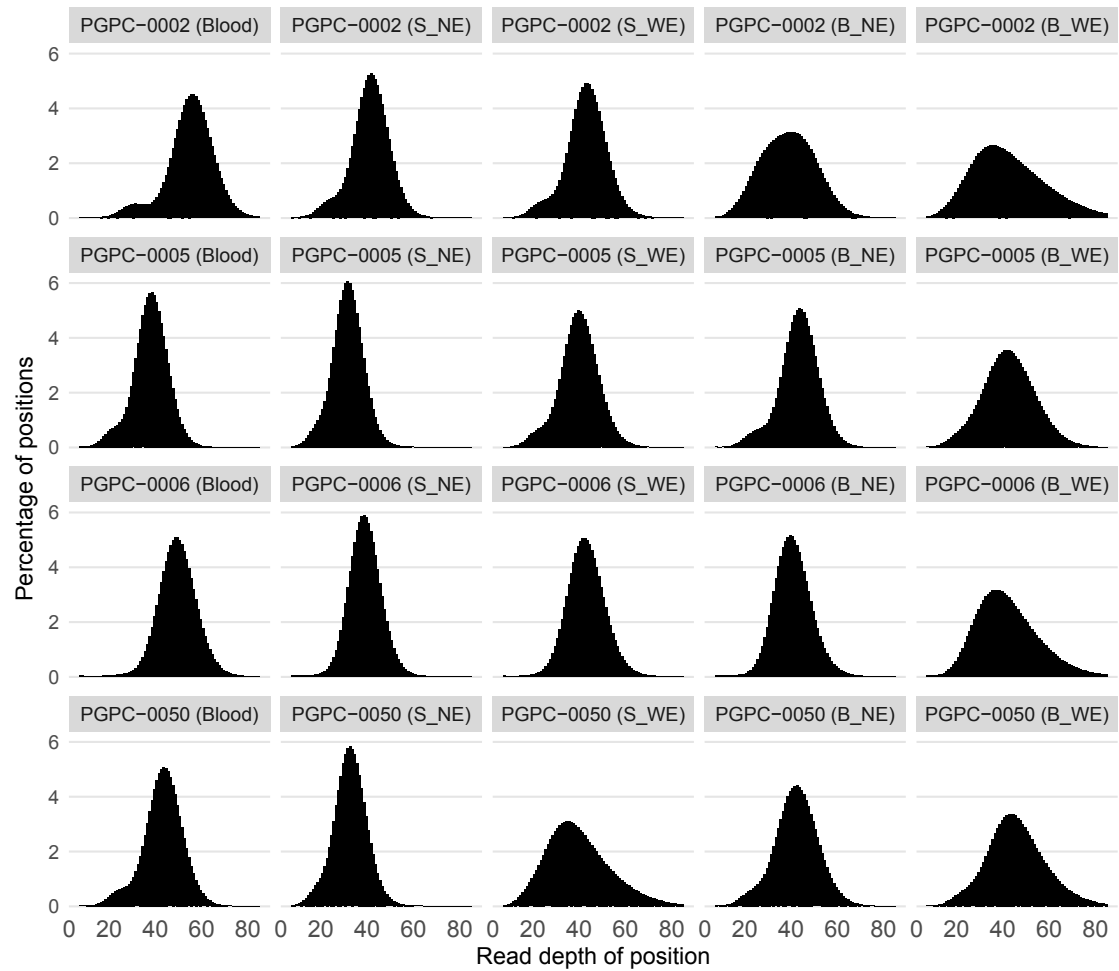

Supplemental Figure 2: Read-depth uniformity of each sample. Each histogram indicates the percentage of genomic positions sequenced to a given depth, with wider peaks indicating lower read-depth uniformity. S\_NE, non-enriched saliva; S\_WE, enriched saliva; B\_NE, non-enriched buccal; B\_WE, enriched buccal.

(A)

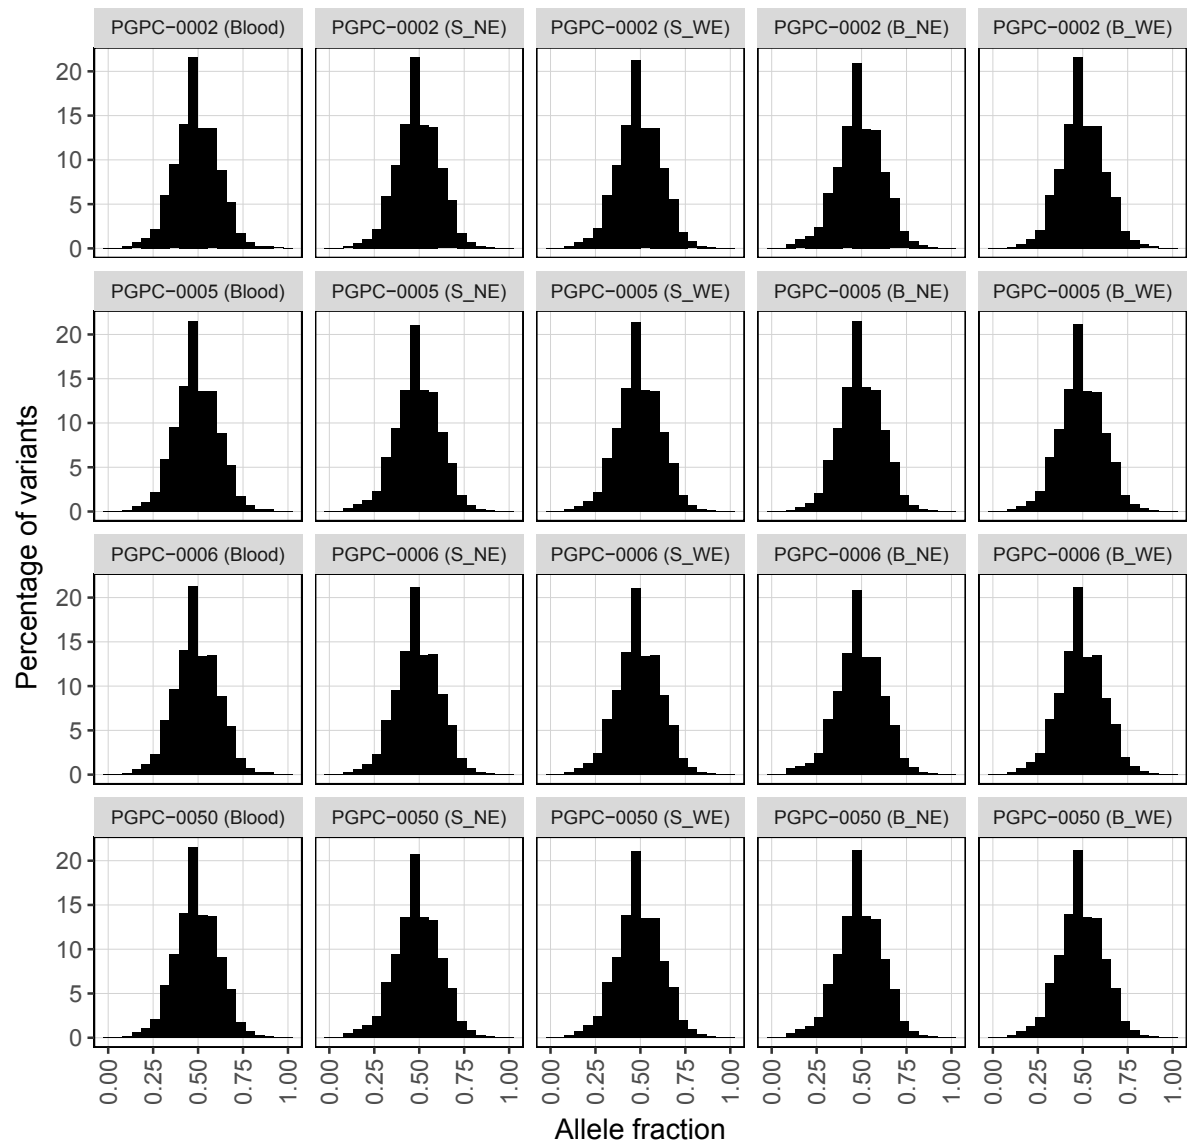

(B)

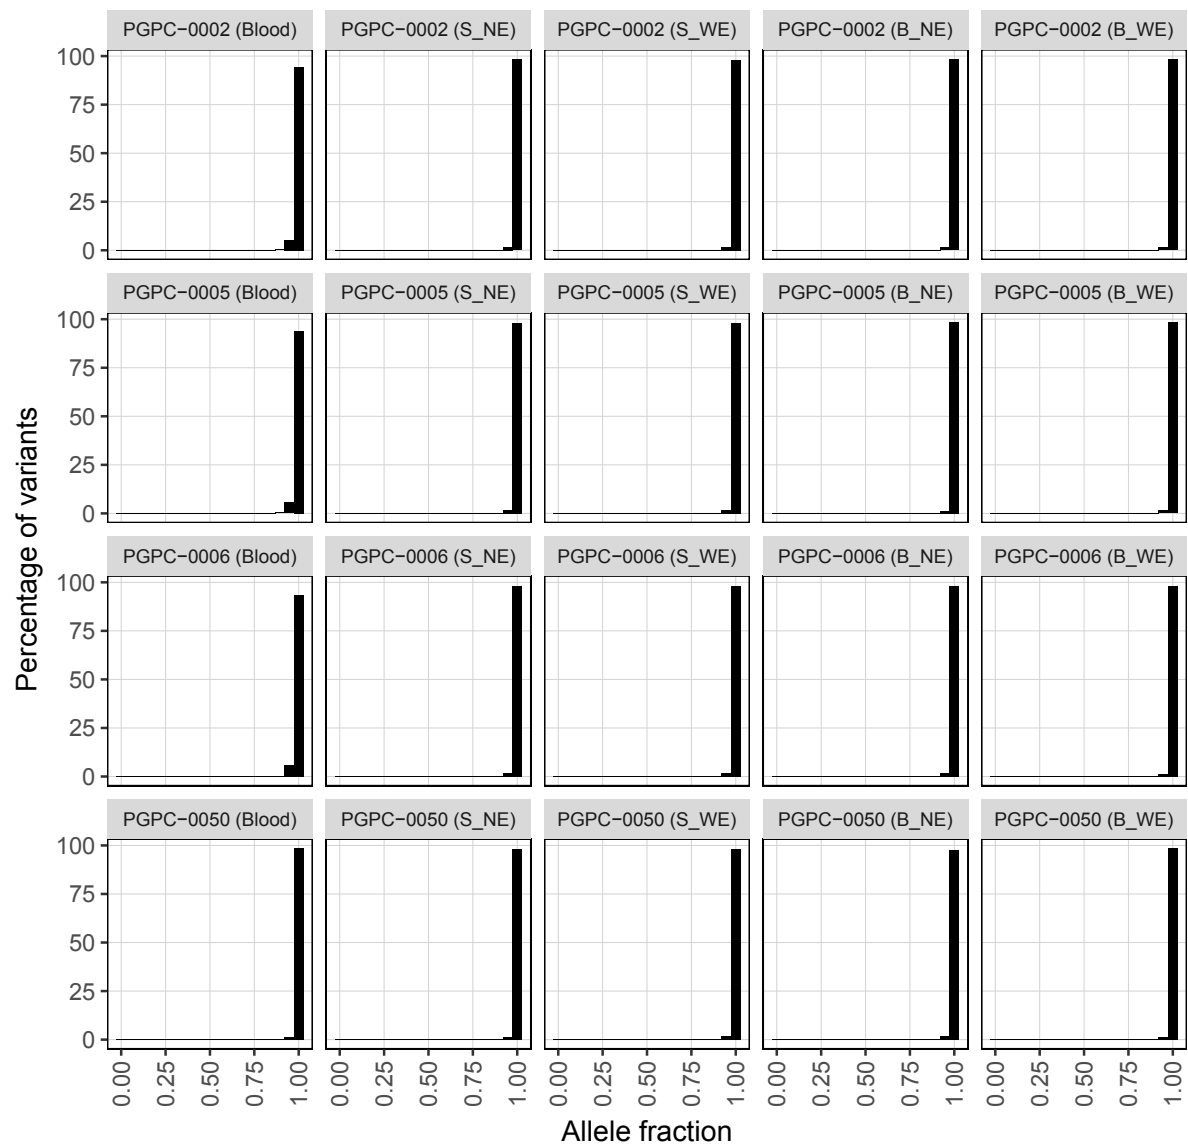

(C)

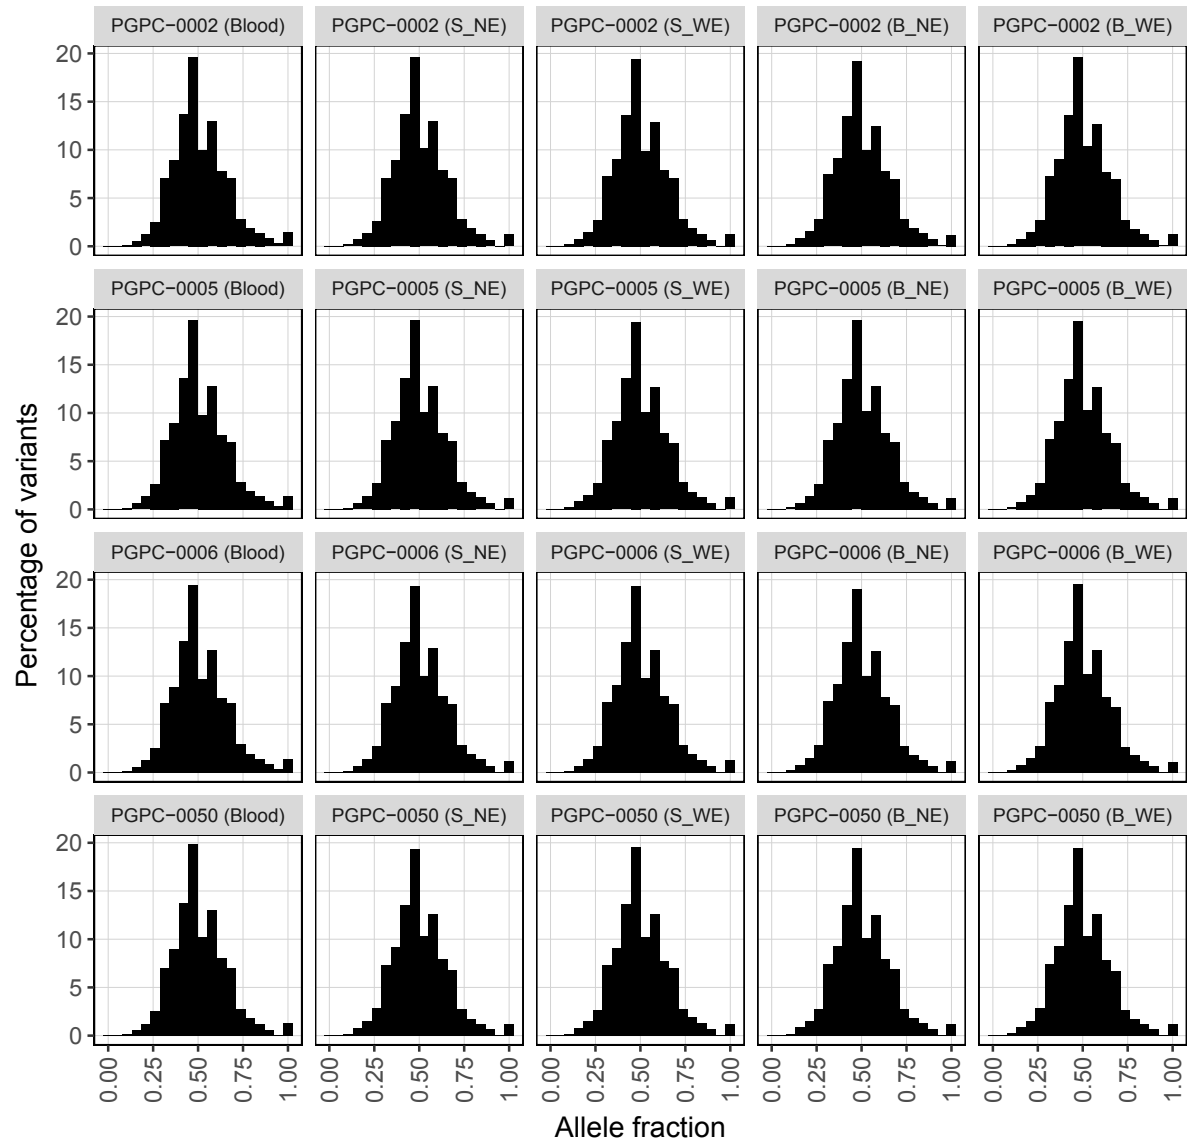

(D)

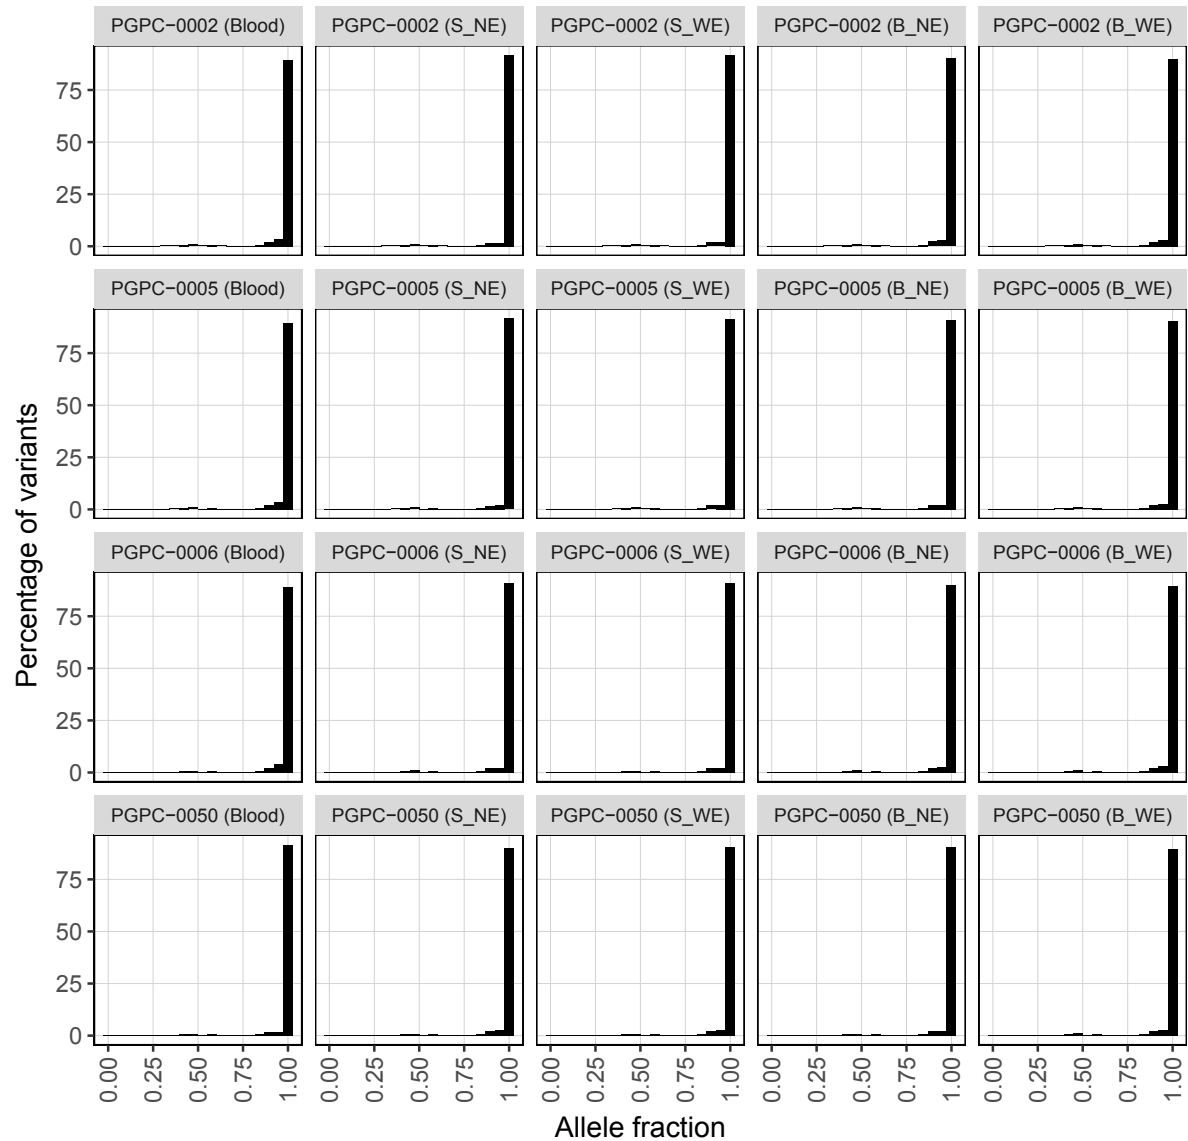

Supplemental Figure 3: Allele fraction distributions for each sample for (A) heterozygous SNVs, (B) homozygous SNVs, (C) heterozygous indels, and (D) homozygous indels. S\_NE, non-enriched saliva; S\_WE, enriched saliva; B\_NE, non-enriched buccal; B\_WE, enriched buccal.



(B)

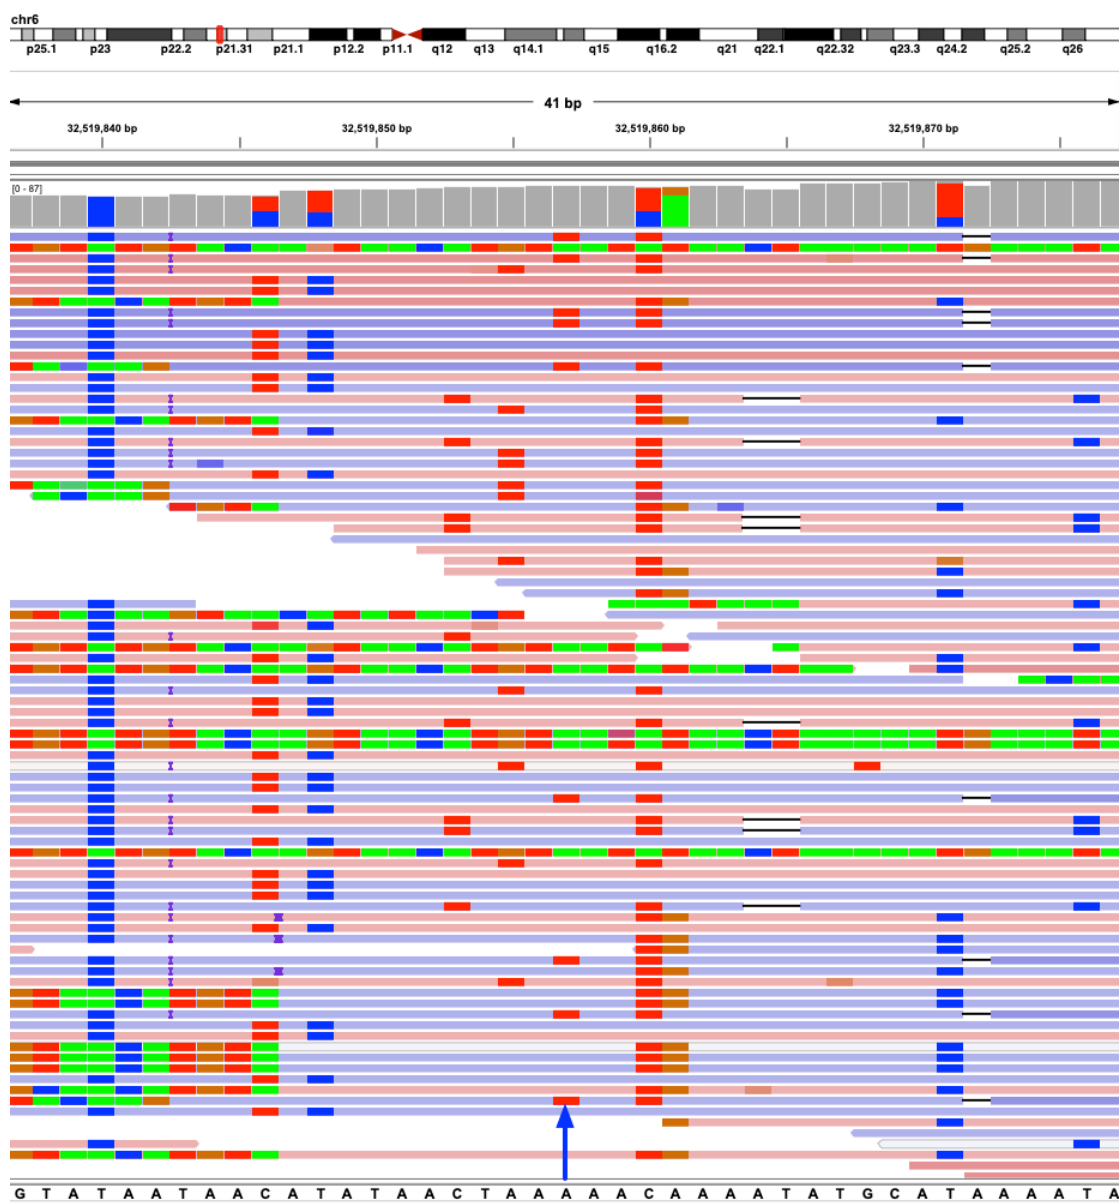



(C)

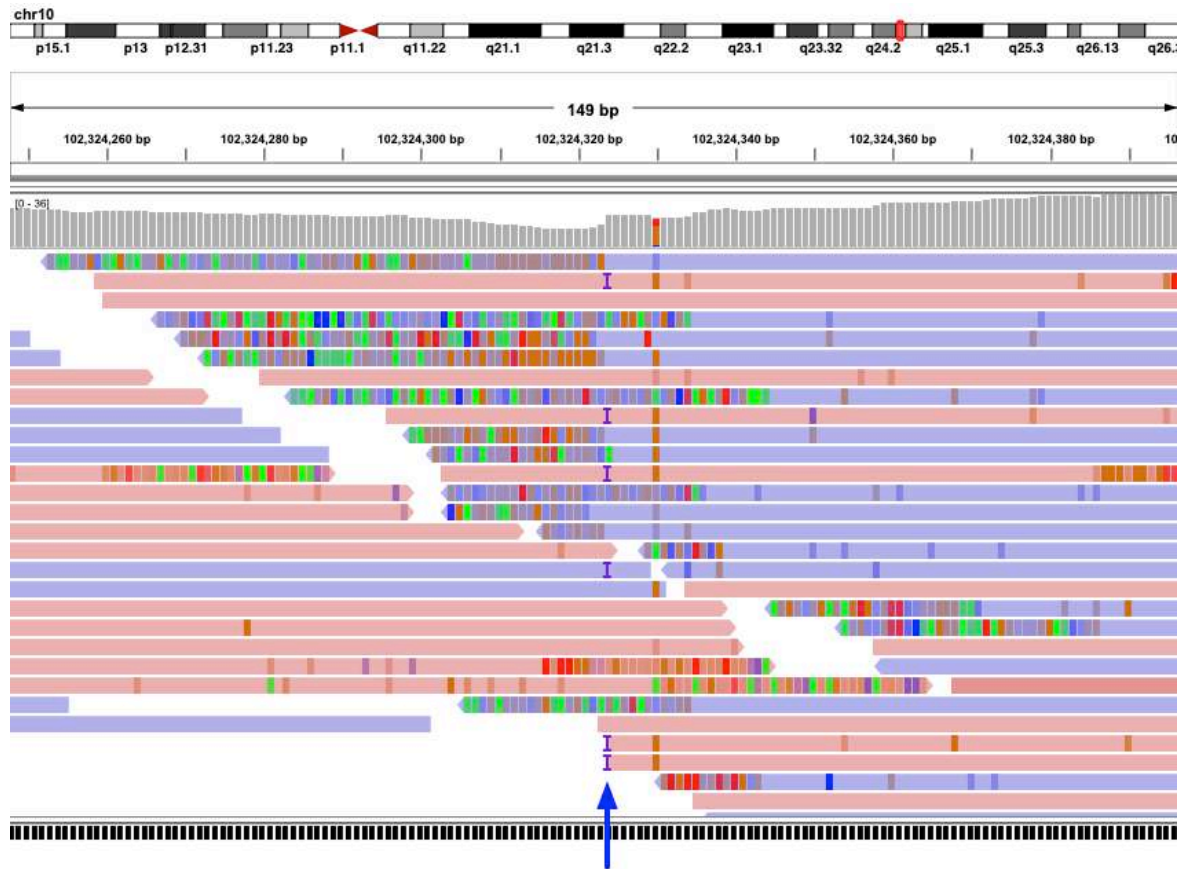

(D)

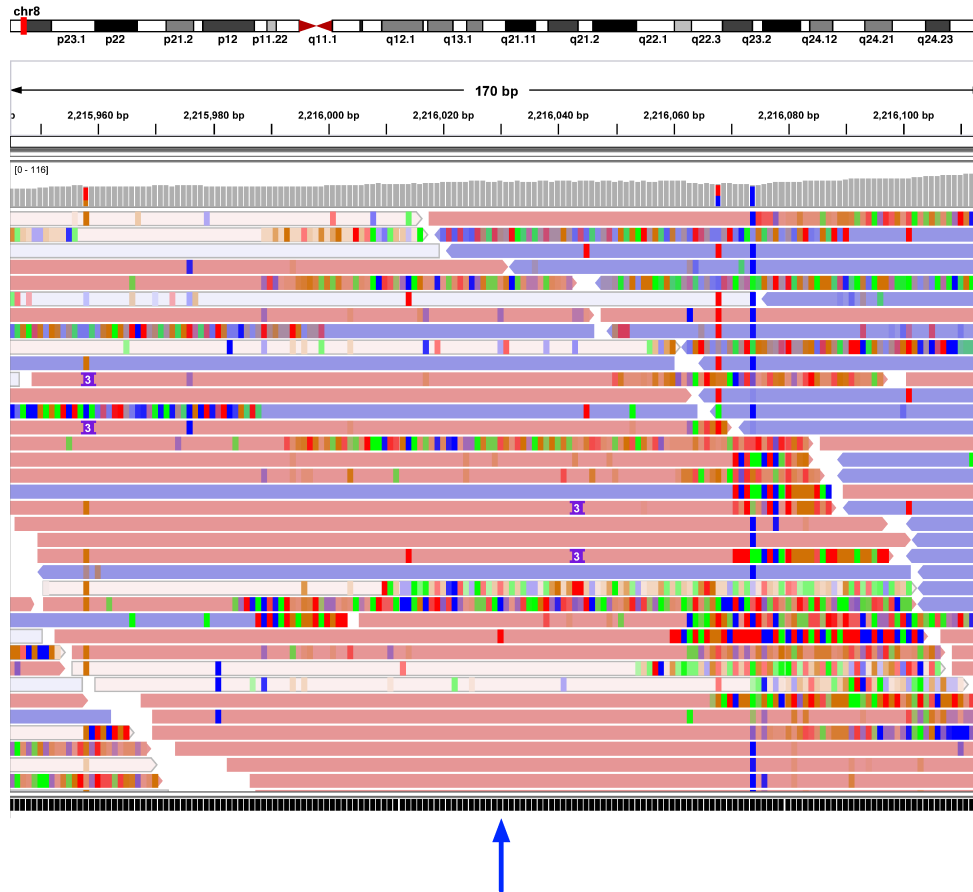

Supplemental Figure 4: Examples of evidence suggesting that a given discordant SNV or indel is false. (A) The SNV chr11.102870149C>T was detected in the blood sample from individual PGPC-0006 but not the non-enriched buccal sample from the same individual. Indications that this SNV is false include the low allele fraction and the inconsistency of other variant calls surrounding the SNV. (B) The SNV chr6:32519857A>T was detected in the enriched buccal sample from individual PGPC-0050 but not the non-enriched buccal sample from the same individual. Indications that this SNV is false include strand bias (almost all reads supporting the variant are from the same strand, indicated by the blue reads) and an abundance of surrounding soft-clipped reads and inconsistent SNVs and indels. (C) The insertion chr10:102324323insG was detected in the blood sample from individual PGPC-0005 but not the non-enriched buccal sample from the same individual. Indications that this insertion is false include an abundance of soft-clipped reads that are inconsistently aligned. (D) The deletion chr8:2216030delGCGAGAGGGCTTGCTGTAGGTCTGGGGGAGTAATGCGACCTTGTGGGGTGTGGGAGGATCTACCAGGCAAAGCGCCTCCAGAAT was detected in the enriched saliva sample from individual PGPC-0006 but not the non-enriched saliva sample from the same individual. Indications that this deletion is false include low supporting evidence, abundant soft-clipping, and inconsistent variant calls in the region. In each panel, the variant being examined is indicated by a blue arrow.

A)

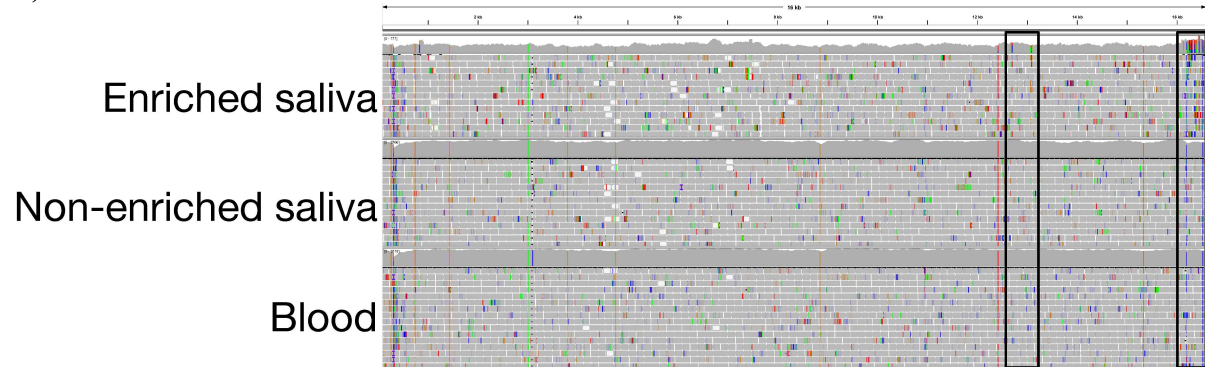

B)

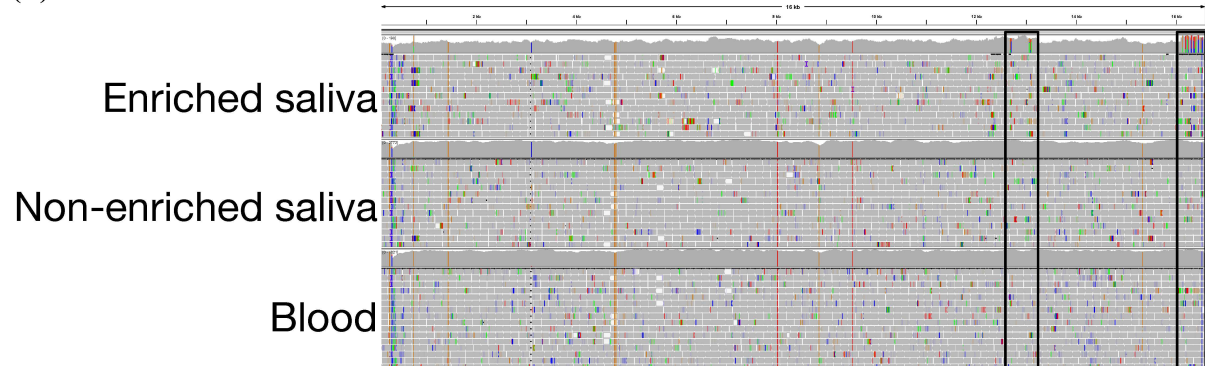

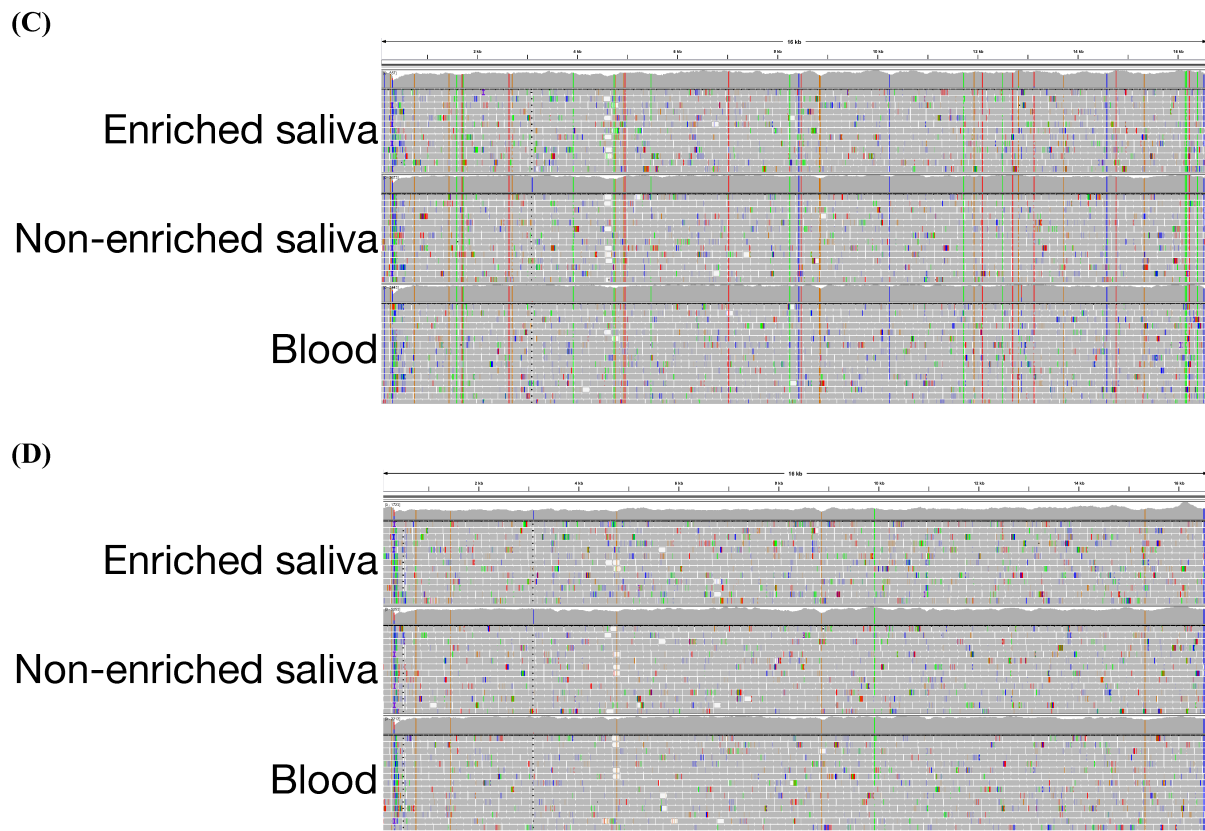

Supplemental Figure 5: Integrative Genomics Viewer visualization of the mitochondrial genome for three sample types (enriched saliva, non-enriched saliva, and blood) for A) PGPC-0002, B) PGPC-0005, C) PGPC-0006, and D) PGPC-0050. The black boxes denote the regions containing clusters of apparent SNVs in the enriched saliva samples from PGPC-0002 and PGPC-0005 but not the non-enriched saliva or blood samples from those individuals or the enriched saliva samples from PGPC-0006 and PGPC-0050.

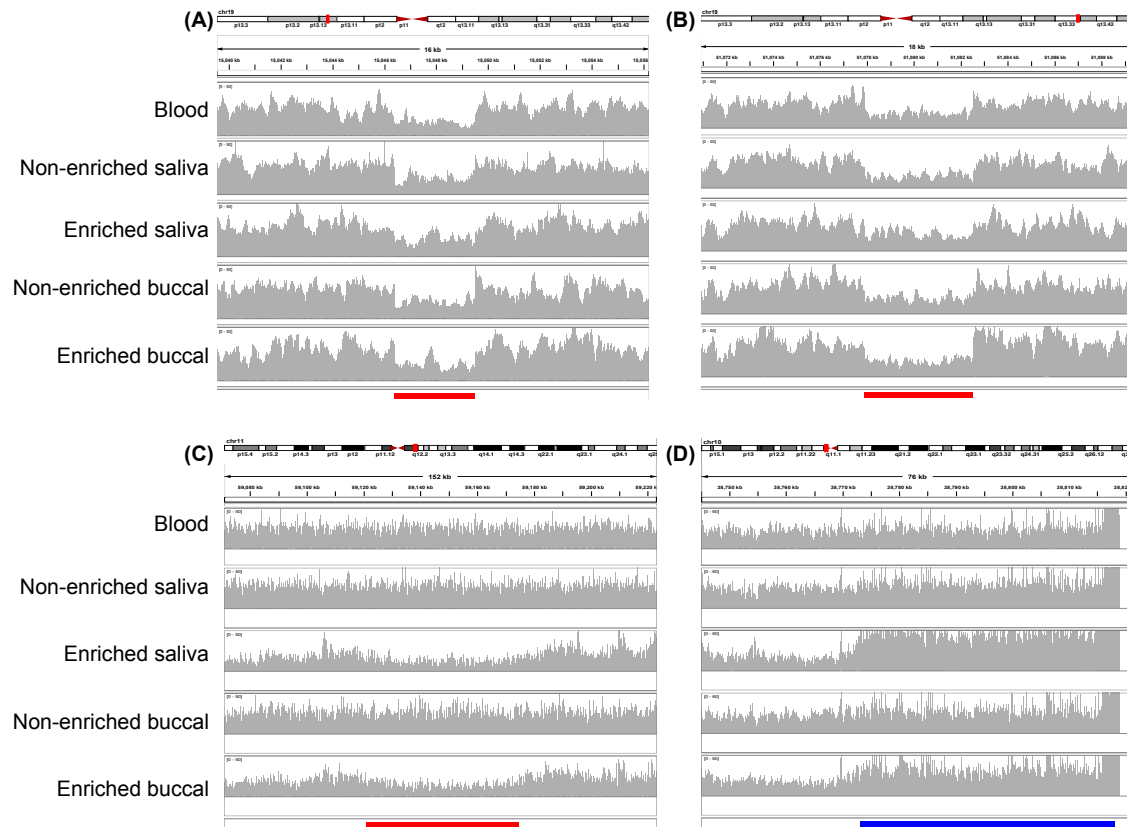

Supplemental Figure 6: Integrative Genomics Viewer coverage plots of selected false-negative and false-positive CNVs detected in saliva and buccal samples that were enriched for eukaryotic DNA. The Y-axis of each plot indicates read depth. (A) True deletion (coordinates chr19:15,046,393-15,049,477; red bar) detected in all sample types from individual PGPC-0005 except the enriched saliva and buccal samples. (B) True deletion (coordinates chr19:51,077,892-51,082,511; red bar) detected in all sample types from individual PGPC-0006 except the enriched saliva and buccal samples. (C) False deletion (coordinates chr11:59,120,801-59,174,600; red bar) detected only in the enriched buccal sample from individual PGPC-0050. (D) False duplication (coordinates chr10:38,773,001-38,818,000; blue bar) detected only in the enriched saliva and buccal samples from individual PGPC-0050. We considered the deletions in panels A and B to be true because they exhibited clear decreases in read depth and had support from anomalously-mapped paired-end reads (not shown). We considered the CNVs in panels C and D to be false because the non-enriched samples and the blood sample did not exhibit changes in read depth in these regions and because they lacked support from split reads or anomalously-mapped paired-end reads.
