# Supplementary material for: Impact of DNA source on genetic variant detection from human whole-genome sequencing data
Source: PubMed Central journal article supplement — J Med Genet. 2019 Sep 12;56(12):809–17. doi: 10.1136/jmedgenet-2019-106281 (PMC6929712; doi:10.1136/jmedgenet-2019-106281), 2019-09-12
Supplement: jmedgenet-2019-106281supp003.pdf [file jmedgenet-2019-106281supp003.pdf]

|                 |                     | Concordant |
|-----------------|---------------------|------------|
| Sample Type 1   | Sample Type 2       |            |
| Blood           | Non-enriched saliva | 95.8       |
| Blood           | Non-enriched buccal | 95.8       |
| Enriched saliva | Non-enriched saliva | 96.5       |
| Enriched buccal | Non-enriched buccal | 95.9       |
| Blood           | Non-enriched saliva | 89         |
| Blood           | Non-enriched buccal | 83.3       |
| Enriched saliva | Non-enriched saliva | 87.7       |
| Enriched buccal | Non-enriched buccal | 84.1       |

| Unique to sample type 1 | Unique to sample type 2 | Concordant |
|-------------------------|-------------------------|------------|
| Coding exons            |                         |            |
|                         |                         |            |
| 2.3                     | 1.9                     | 96.4       |
| 2.3                     | 1.9                     | 96.2       |
| 1.8                     | 1.8                     | 97         |
| 0.8                     | 3.3                     | 96         |
|                         |                         |            |
| 4.7                     | 6.3                     | 88.6       |
| 6                       | 10.7                    | 87.2       |
| 4.9                     | 7.4                     | 88.5       |
| 6                       | 9.9                     | 87.4       |

| Unique to sample type 1 | Unique to sample type 2 | Concordant |
|-------------------------|-------------------------|------------|
| All exons               |                         |            |
| SNVs                    |                         |            |
| 2                       | 1.6                     | 96.6       |
| 1.9                     | 1.9                     | 96.4       |
| 1.6                     | 1.4                     | 97.2       |
| 0.9                     | 3.1                     | 96.2       |
| Indels                  |                         |            |
| 5                       | 6.5                     | 87.4       |
| 5.8                     | 7.1                     | 86.3       |
| 5.6                     | 6                       | 88         |
| 6.2                     | 6.4                     | 86.4       |

| Unique to sample type 1 | Unique to sample type 2 | Concordant |
|-------------------------|-------------------------|------------|
| Introns                 |                         |            |
|                         |                         |            |
| 1.8                     | 1.6                     | 95.7       |
| 1.9                     | 1.7                     | 95.4       |
| 1.5                     | 1.3                     | 96.6       |
| 1.2                     | 2.5                     | 94.9       |
|                         |                         |            |
| 5.7                     | 7                       | 86.8       |
| 6.8                     | 7                       | 85.1       |
| 5.8                     | 6.2                     | 87.6       |
| 6.8                     | 6.8                     | 84.7       |

| Unique to sample type 1 | Unique to sample type 2 |
|-------------------------|-------------------------|
| Intergenic regions      |                         |
|                         |                         |
| 2.3                     | 2                       |
| 2.4                     | 2.2                     |
| 1.9                     | 1.5                     |
| 1.5                     | 3.7                     |
|                         |                         |
| 5.6                     | 7.5                     |
| 7.4                     | 7.5                     |
| 6                       | 6.4                     |
| 7.1                     | 8.2                     |

|                 |                     | Concordant |
|-----------------|---------------------|------------|
| Sample Type 1   | Sample Type 2       |            |
| Blood           | Non-enriched saliva | 96.3       |
| Blood           | Non-enriched buccal | 95.3       |
| Enriched saliva | Non-enriched saliva | 96.2       |
| Enriched buccal | Non-enriched buccal | 95.7       |
| Blood           | Non-enriched saliva | 76.8       |
| Blood           | Non-enriched buccal | 79.8       |
| Enriched saliva | Non-enriched saliva | 79.2       |
| Enriched buccal | Non-enriched buccal | 79.9       |

| Unique to sample type 1 | Unique to sample type 2 | Concordant |
|-------------------------|-------------------------|------------|
| Coding exons            |                         |            |
|                         |                         |            |
| 1.6                     | 2.1                     | 96.8       |
| 2.9                     | 1.8                     | 95.9       |
| 1.7                     | 2.1                     | 97         |
| 2.6                     | 1.7                     | 96.1       |
|                         |                         |            |
| 14.7                    | 8.4                     | 87.7       |
| 12                      | 8.2                     | 87.5       |
| 13.3                    | 7.5                     | 88.2       |
| 11.3                    | 8.8                     | 87.4       |

| Unique to sample type 1 | Unique to sample type 2 | Concordant |
|-------------------------|-------------------------|------------|
| All exons               |                         |            |
| SNVs                    |                         |            |
| 1.5                     | 1.7                     | 96.9       |
| 2.6                     | 1.6                     | 96.2       |
| 1.4                     | 1.6                     | 97.3       |
| 2.4                     | 1.5                     | 96.4       |
| Indels                  |                         |            |
| 6.4                     | 5.9                     | 87.4       |
| 6.3                     | 6.1                     | 87.5       |
| 6.8                     | 5                       | 87.8       |
| 6.6                     | 6                       | 87.8       |



| Unique to sample type 1 | Unique to sample type 2 | Concordant |
|-------------------------|-------------------------|------------|
| Introns                 |                         |            |
|                         |                         |            |
| 1.6                     | 1.5                     | 96.3       |
| 2.2                     | 1.6                     | 94.9       |
| 1.4                     | 1.3                     | 96.8       |
| 2.1                     | 1.5                     | 95.2       |
|                         |                         |            |
| 6.1                     | 6.5                     | 87.1       |
| 5.9                     | 6.6                     | 87         |
| 6.3                     | 5.8                     | 87.5       |
| 6.1                     | 6.1                     | 86.8       |

| Unique to sample type 1   | Unique to sample type 2 |
|---------------------------|-------------------------|
| <b>Intergenic regions</b> |                         |
|                           |                         |
| 1.8                       | 1.9                     |
| 3                         | 2.1                     |
| 1.6                       | 1.6                     |
| 2.8                       | 2                       |
|                           |                         |
| 6.2                       | 6.6                     |
| 6.3                       | 6.8                     |
| 6.5                       | 6                       |
| 6.4                       | 6.7                     |

|                 |                     | Concordant |
|-----------------|---------------------|------------|
| Sample Type 1   | Sample Type 2       |            |
| Blood           | Non-enriched saliva | 96.3       |
| Blood           | Non-enriched buccal | 96.4       |
| Enriched saliva | Non-enriched saliva | 96.3       |
| Enriched buccal | Non-enriched buccal | 96.5       |
| Blood           | Non-enriched saliva | 74.2       |
| Blood           | Non-enriched buccal | 80         |
| Enriched saliva | Non-enriched saliva | 78.7       |
| Enriched buccal | Non-enriched buccal | 84         |

| Unique to sample type 1 | Unique to sample type 2 | Concordant |
|-------------------------|-------------------------|------------|
| Coding exons            |                         |            |
|                         |                         |            |
| 1.6                     | 2.1                     | 96.7       |
| 1.6                     | 2                       | 96.6       |
| 1.9                     | 1.8                     | 96.9       |
| 1.7                     | 1.8                     | 96.9       |
|                         |                         |            |
| 11.3                    | 14.5                    | 85.7       |
| 7.8                     | 12.2                    | 86         |
| 11.5                    | 9.7                     | 86.9       |
| 7.6                     | 8.4                     | 87.7       |

| Unique to sample type 1 | Unique to sample type 2 | Concordant |
|-------------------------|-------------------------|------------|
| All exons               |                         |            |
| SNVs                    |                         |            |
| 1.5                     | 1.8                     | 96.7       |
| 1.5                     | 1.9                     | 96.6       |
| 1.6                     | 1.5                     | 97.2       |
| 1.5                     | 1.5                     | 96.9       |
| Indels                  |                         |            |
| 5.7                     | 8.5                     | 86.6       |
| 5.8                     | 8.3                     | 86.2       |
| 6.6                     | 6.5                     | 87.7       |
| 6.6                     | 5.7                     | 86.7       |

| Unique to sample type 1 | Unique to sample type 2 | Concordant |
|-------------------------|-------------------------|------------|
| Introns                 |                         |            |
|                         |                         |            |
| 1.6                     | 1.7                     | 96.1       |
| 1.6                     | 1.8                     | 95.8       |
| 1.5                     | 1.3                     | 96.5       |
| 1.5                     | 1.6                     | 96.2       |
|                         |                         |            |
| 5.8                     | 7.6                     | 85.7       |
| 6.1                     | 7.7                     | 85.1       |
| 6                       | 6.3                     | 86.8       |
| 6.6                     | 6.7                     | 85         |

| Unique to sample type 1   | Unique to sample type 2 |
|---------------------------|-------------------------|
| <b>Intergenic regions</b> |                         |
|                           |                         |
| 1.9                       | 2                       |
| 2                         | 2.1                     |
| 1.9                       | 1.6                     |
| 1.8                       | 2                       |
|                           |                         |
| 5.9                       | 8.4                     |
| 6.4                       | 8.4                     |
| 6.4                       | 6.8                     |
| 6.9                       | 8.1                     |

|                 |                     | Concordant |
|-----------------|---------------------|------------|
| Sample Type 1   | Sample Type 2       |            |
| Blood           | Non-enriched saliva | 96.2       |
| Blood           | Non-enriched buccal | 97         |
| Enriched saliva | Non-enriched saliva | 96.4       |
| Enriched buccal | Non-enriched buccal | 96.6       |
| Blood           | Non-enriched saliva | 81.1       |
| Blood           | Non-enriched buccal | 82.4       |
| Enriched saliva | Non-enriched saliva | 81.9       |
| Enriched buccal | Non-enriched buccal | 81.8       |



| Unique to sample type 1 | Unique to sample type 2 | Concordant |
|-------------------------|-------------------------|------------|
| Coding exons            |                         |            |
|                         |                         |            |
| 1.3                     | 2.5                     | 96.7       |
| 1.2                     | 1.8                     | 97.4       |
| 1.8                     | 1.9                     | 96.9       |
| 1.6                     | 1.7                     | 97         |
|                         |                         |            |
| 9.6                     | 9.3                     | 87.8       |
| 4.9                     | 12.7                    | 87.5       |
| 12                      | 6.1                     | 87.7       |
| 7.8                     | 10.4                    | 87.6       |

| Unique to sample type 1 | Unique to sample type 2 | Concordant |
|-------------------------|-------------------------|------------|
| All exons               |                         |            |
| SNVs                    |                         |            |
| 1.1                     | 2.1                     | 97.1       |
| 1.1                     | 1.5                     | 97.3       |
| 1.4                     | 1.7                     | 96.9       |
| 1.6                     | 1.4                     | 97.2       |
| Indels                  |                         |            |
| 6.4                     | 5.8                     | 87.6       |
| 5.8                     | 6.7                     | 87.5       |
| 6.7                     | 5.6                     | 86.7       |
| 6.2                     | 6.1                     | 87.7       |

| Unique to sample type 1 | Unique to sample type 2 | Concordant |
|-------------------------|-------------------------|------------|
| Introns                 |                         |            |
|                         |                         |            |
| 1.2                     | 1.7                     | 96.4       |
| 1.3                     | 1.4                     | 96.7       |
| 1.3                     | 1.7                     | 96.1       |
| 1.6                     | 1.2                     | 96.5       |
|                         |                         |            |
| 6                       | 6.4                     | 87.2       |
| 5.9                     | 6.6                     | 86.7       |
| 6.3                     | 7                       | 85.1       |
| 6.4                     | 6                       | 86.6       |

| Unique to sample type 1   | Unique to sample type 2 |
|---------------------------|-------------------------|
| <b>Intergenic regions</b> |                         |
|                           |                         |
| 1.4                       | 2.2                     |
| 1.5                       | 1.7                     |
| 1.5                       | 2.4                     |
| 1.9                       | 1.6                     |
|                           |                         |
| 5.9                       | 6.9                     |
| 6.2                       | 7                       |
| 6.2                       | 8.7                     |
| 6.7                       | 6.7                     |

|                 |                     | Concordant |
|-----------------|---------------------|------------|
| Sample Type 1   | Sample Type 2       |            |
| Blood           | Non-enriched saliva | 58.9       |
| Blood           | Non-enriched buccal | 65.3       |
| Enriched saliva | Non-enriched saliva | 64         |
| Enriched buccal | Non-enriched buccal | 61.5       |
| Blood           | Non-enriched saliva | 60         |
| Blood           | Non-enriched buccal | 50         |
| Enriched saliva | Non-enriched saliva | 80         |
| Enriched buccal | Non-enriched buccal | 41.7       |

| Unique to sample type 1 | Unique to sample type 2 | Concordant |
|-------------------------|-------------------------|------------|
| Coding exons            |                         |            |
|                         |                         |            |
| 14.3                    | 26.8                    | 68.4       |
| 18.4                    | 16.3                    | 64.8       |
| 4                       | 32                      | 69.2       |
| 23.1                    | 15.4                    | 63.4       |
|                         |                         |            |
| 10                      | 30                      | 68.3       |
| 20                      | 30                      | 65.5       |
| 10                      | 10                      | 76.2       |
| 33.3                    | 25                      | 65.5       |

| Unique to sample type 1 | Unique to sample type 2 | Concordant |
|-------------------------|-------------------------|------------|
| All exons               |                         |            |
| SNVs                    |                         |            |
| 14.7                    | 16.9                    | 64.5       |
| 13.1                    | 22.1                    | 49.9       |
| 15.5                    | 15.3                    | 66.3       |
| 8.4                     | 28.3                    | 46.5       |
| Indels                  |                         |            |
| 13.4                    | 18.3                    | 65.2       |
| 14.3                    | 20.2                    | 62.9       |
| 11.2                    | 12.5                    | 66.5       |
| 17.2                    | 17.2                    | 65.8       |

| Unique to sample type 1 | Unique to sample type 2 | Concordant |
|-------------------------|-------------------------|------------|
| Introns                 |                         |            |
|                         |                         |            |
| 19                      | 16.5                    | 57.5       |
| 12.6                    | 37.5                    | 43.8       |
| 19.5                    | 14.1                    | 59.1       |
| 9.4                     | 44.1                    | 41.4       |
|                         |                         |            |
| 16.3                    | 18.5                    | 62.7       |
| 18.1                    | 19                      | 61.3       |
| 17.5                    | 15.9                    | 65         |
| 17.5                    | 16.6                    | 62.9       |



| Unique to sample type 1   | Unique to sample type 2 |
|---------------------------|-------------------------|
| <b>Intergenic regions</b> |                         |
|                           |                         |
| 23.9                      | 18.6                    |
| 14.2                      | 42                      |
| 26.8                      | 14.1                    |
| 8                         | 50.6                    |
|                           |                         |
| 15.7                      | 21.6                    |
| 16                        | 22.7                    |
| 18                        | 16.9                    |
| 16.3                      | 20.8                    |

|                 |                     | Concordant |
|-----------------|---------------------|------------|
| Sample Type 1   | Sample Type 2       |            |
| Blood           | Non-enriched saliva | 3.6        |
| Blood           | Non-enriched buccal | 25.5       |
| Enriched saliva | Non-enriched saliva | 5.9        |
| Enriched buccal | Non-enriched buccal | 22.8       |
| Blood           | Non-enriched saliva | 87.5       |
| Blood           | Non-enriched buccal | 77.8       |
| Enriched saliva | Non-enriched saliva | 77.8       |
| Enriched buccal | Non-enriched buccal | 77.8       |

| Unique to sample type 1 | Unique to sample type 2 | Concordant |
|-------------------------|-------------------------|------------|
| Coding exons            |                         |            |
|                         |                         |            |
| 1.2                     | 95.3                    | 26.1       |
| 8.5                     | 66                      | 59.2       |
| 5.9                     | 88.2                    | 27.5       |
| 24.6                    | 52.6                    | 52.8       |
|                         |                         |            |
| 12.5                    | 0                       | 72.5       |
| 11.1                    | 11.1                    | 72.3       |
| 22.2                    | 0                       | 72.1       |
| 11.1                    | 11.1                    | 67.2       |

| Unique to sample type 1 | Unique to sample type 2 | Concordant |
|-------------------------|-------------------------|------------|
| All exons               |                         |            |
| SNVs                    |                         |            |
| 5.1                     | 68.9                    | 45.2       |
| 17.2                    | 23.7                    | 56.2       |
| 9.1                     | 63.4                    | 45.3       |
| 27.5                    | 19.7                    | 54.8       |
| Indels                  |                         |            |
| 13                      | 14.5                    | 61.8       |
| 18.5                    | 9.2                     | 62         |
| 11.8                    | 16.2                    | 61.9       |
| 17.2                    | 15.6                    | 63.4       |

| Unique to sample type 1 | Unique to sample type 2 | Concordant |
|-------------------------|-------------------------|------------|
| Introns                 |                         |            |
| 10.4                    | 44.4                    | 54.4       |
| 26.9                    | 16.9                    | 55.2       |
| 12.1                    | 42.6                    | 54.2       |
| 29.1                    | 16.1                    | 53.1       |
| 20.7                    | 17.5                    | 62.6       |
| 19                      | 19                      | 63.3       |
| 21.5                    | 16.6                    | 61.6       |
| 19.3                    | 17.4                    | 63.1       |

| Unique to sample type 1   | Unique to sample type 2 |
|---------------------------|-------------------------|
| <b>Intergenic regions</b> |                         |
|                           |                         |
| 12.8                      | 32.8                    |
| 32                        | 12.9                    |
| 14.1                      | 31.7                    |
| 34.9                      | 12                      |
|                           |                         |
| 19.4                      | 18                      |
| 19                        | 17.7                    |
| 21.3                      | 17.1                    |
| 19.9                      | 17                      |

|                 |                     | Concordant |
|-----------------|---------------------|------------|
| Sample Type 1   | Sample Type 2       |            |
| Blood           | Non-enriched saliva | 16.7       |
| Blood           | Non-enriched buccal | 42.3       |
| Enriched saliva | Non-enriched saliva | 15.5       |
| Enriched buccal | Non-enriched buccal | 39.3       |
| Blood           | Non-enriched saliva | 83.3       |
| Blood           | Non-enriched buccal | 66.7       |
| Enriched saliva | Non-enriched saliva | 100        |
| Enriched buccal | Non-enriched buccal | 100        |

| Unique to sample type 1 | Unique to sample type 2 | Concordant |
|-------------------------|-------------------------|------------|
| Coding exons            |                         |            |
| 1.5                     | 81.8                    | 58.2       |
| 3.8                     | 53.8                    | 53.9       |
| 8.5                     | 76.1                    | 52.5       |
| 10.7                    | 50                      | 56         |
| 16.7                    | 0                       | 74.6       |
| 33.3                    | 0                       | 72.6       |
| 0                       | 0                       | 72.3       |
| 0                       | 0                       | 82.8       |



| Unique to sample type 1 | Unique to sample type 2 | Concordant |
|-------------------------|-------------------------|------------|
| All exons               |                         |            |
| SNVs                    |                         |            |
| 14.5                    | 27.3                    | 62.2       |
| 17.7                    | 28.4                    | 38.5       |
| 16.7                    | 30.9                    | 61.2       |
| 17                      | 27.1                    | 37.6       |
| Indels                  |                         |            |
| 9.5                     | 15.9                    | 64.9       |
| 12.9                    | 14.5                    | 64.8       |
| 12.3                    | 15.4                    | 65.4       |
| 6.9                     | 10.3                    | 66.1       |

| Unique to sample type 1 | Unique to sample type 2 | Concordant |
|-------------------------|-------------------------|------------|
| Introns                 |                         |            |
| 15.5                    | 22.3                    | 62.3       |
| 10                      | 51.5                    | 44.9       |
| 16.5                    | 22.3                    | 60.4       |
| 13.8                    | 48.6                    | 43.3       |
| 15.5                    | 19.6                    | 58.3       |
| 15.1                    | 20                      | 60.4       |
| 16.9                    | 17.8                    | 59.8       |
| 18.2                    | 15.7                    | 60.2       |

| Unique to sample type 1   | Unique to sample type 2 |
|---------------------------|-------------------------|
| <b>Intergenic regions</b> |                         |
|                           |                         |
| 17.8                      | 19.9                    |
| 13.1                      | 41.9                    |
| 19.8                      | 19.8                    |
| 17.7                      | 39                      |
|                           |                         |
| 15.3                      | 26.3                    |
| 14.8                      | 24.9                    |
| 18.5                      | 21.6                    |
| 18.5                      | 21.3                    |

|                 |                     | Concordant |
|-----------------|---------------------|------------|
| Sample Type 1   | Sample Type 2       |            |
| Blood           | Non-enriched saliva | 24.9       |
| Blood           | Non-enriched buccal | 70.7       |
| Enriched saliva | Non-enriched saliva | 23.8       |
| Enriched buccal | Non-enriched buccal | 62.1       |
| Blood           | Non-enriched saliva | 61.5       |
| Blood           | Non-enriched buccal | 75         |
| Enriched saliva | Non-enriched saliva | 76.9       |
| Enriched buccal | Non-enriched buccal | 80         |

| Unique to sample type 1 | Unique to sample type 2 | Concordant |
|-------------------------|-------------------------|------------|
| Coding exons            |                         |            |
|                         |                         |            |
| 1.5                     | 73.7                    | 44.1       |
| 5.2                     | 24.1                    | 75.9       |
| 4.4                     | 71.8                    | 43         |
| 16.7                    | 21.2                    | 70.2       |
|                         |                         |            |
| 7.7                     | 30.8                    | 66.7       |
| 0                       | 25                      | 69.8       |
| 7.7                     | 15.4                    | 70.7       |
| 20                      | 0                       | 71.7       |

| Unique to sample type 1 | Unique to sample type 2 | Concordant |
|-------------------------|-------------------------|------------|
| All exons               |                         |            |
| SNVs                    |                         |            |
| 3                       | 52.9                    | 57.2       |
| 5.6                     | 18.5                    | 58.9       |
| 9.8                     | 47.2                    | 56.9       |
| 14.1                    | 15.6                    | 59.9       |
| Indels                  |                         |            |
| 12.9                    | 20.4                    | 67.4       |
| 7.3                     | 22.9                    | 67.7       |
| 18.2                    | 11.1                    | 65.2       |
| 16                      | 12.3                    | 67.9       |

| Unique to sample type 1 | Unique to sample type 2 | Concordant |
|-------------------------|-------------------------|------------|
| Introns                 |                         |            |
| 6.7                     | 36.2                    | 55.5       |
| 7.5                     | 33.7                    | 53.3       |
| 11                      | 32.1                    | 56.1       |
| 9.6                     | 30.5                    | 54.9       |
| 15.8                    | 16.8                    | 64.8       |
| 15.6                    | 16.7                    | 65         |
| 17.4                    | 17.4                    | 62.2       |
| 17.6                    | 14.5                    | 66.9       |

| Unique to sample type 1   | Unique to sample type 2 |
|---------------------------|-------------------------|
| <b>Intergenic regions</b> |                         |
|                           |                         |
| 9.9                       | 34.6                    |
| 9.5                       | 37.2                    |
| 15.6                      | 28.3                    |
| 13                        | 32.2                    |
|                           |                         |
| 15.5                      | 19.7                    |
| 14                        | 21                      |
| 19.7                      | 18.1                    |
| 17.7                      | 15.4                    |



|                 |                     | Concordant |
|-----------------|---------------------|------------|
| Sample type 1   | Sample type 2       |            |
| Blood           | Non-enriched saliva | 4          |
| Blood           | Non-enriched buccal | 1          |
| Enriched saliva | Non-enriched saliva | 4          |
| Enriched buccal | Non-enriched buccal | 1          |
| Blood           | Non-enriched saliva | 1          |
| Blood           | Non-enriched buccal | 1          |
| Enriched saliva | Non-enriched saliva | 1          |
| Enriched buccal | Non-enriched buccal | 0          |

| Unique to sample type 1 | Unique to sample type 2 | Concordant |
|-------------------------|-------------------------|------------|
| [1 kb,5 kb]             |                         |            |
| Deletions               |                         |            |
| 2/2                     | 1/1                     | 3          |
| 5/5                     | 0/0                     | 2          |
| 1/1                     | 1/1                     | 3          |
| 0/0                     | 0/0                     | 0          |
| Duplications            |                         |            |
| 0/0                     | 0/0                     | 0          |
| 0/0                     | 0/1                     | 0          |
| 0/0                     | 0/0                     | 0          |
| 0/0                     | 1/2                     | 0          |

| Unique to sample type 1 | Unique to sample type 2 | Concordant |
|-------------------------|-------------------------|------------|
| [5 kb,10 kb)            |                         |            |
| 0/0                     | 0/0                     | 4          |
| 1/1                     | 1/1                     | 3          |
| 0/0                     | 0/0                     | 3          |
| 0/0                     | 2/3                     | 1          |
| 0/0                     | 0/0                     | 3          |
| 0/0                     | 0/0                     | 2          |
| 0/1                     | 0/0                     | 2          |
| 0/0                     | 0/0                     | 1          |

| Unique to sample type 1 | Unique to sample type 2 |
|-------------------------|-------------------------|
| [10 kb,...)             |                         |
|                         |                         |
| 0/0                     | 0/0                     |
| 1/1                     | 0/0                     |
| 0/0                     | 1/1                     |
| 0/1                     | 2/2                     |
|                         |                         |
| 0/0                     | 0/0                     |
| 1/1                     | 0/0                     |
| 0/0                     | 1/1                     |
| 0/3                     | 1/1                     |

|                 |                     | Concordant |
|-----------------|---------------------|------------|
| Sample type 1   | Sample type 2       |            |
| Blood           | Non-enriched saliva | 2          |
| Blood           | Non-enriched buccal | 4          |
| Enriched saliva | Non-enriched saliva | 0          |
| Enriched buccal | Non-enriched buccal | 0          |
| Blood           | Non-enriched saliva | 0          |
| Blood           | Non-enriched buccal | 0          |
| Enriched saliva | Non-enriched saliva | 0          |
| Enriched buccal | Non-enriched buccal | 0          |

| Unique to sample type 1 | Unique to sample type 2 | Concordant |
|-------------------------|-------------------------|------------|
| [1 kb,5 kb]             |                         |            |
| Deletions               |                         |            |
| 4/4                     | 1/2                     | 1          |
| 2/2                     | 1/1                     | 2          |
| 2/2                     | 3/4                     | 1          |
| 0/0                     | 5/5                     | 1          |
| Duplications            |                         |            |
| 0/0                     | 0/0                     | 0          |
| 0/0                     | 0/1                     | 0          |
| 0/0                     | 0/0                     | 0          |
| 0/0                     | 0/1                     | 0          |

| Unique to sample type 1 | Unique to sample type 2 | Concordant |
|-------------------------|-------------------------|------------|
| [5 kb,10 kb)            |                         |            |
| 1/1                     | 0/0                     | 2          |
| 0/0                     | 1/1                     | 2          |
| 2/2                     | 0/0                     | 2          |
| 0/0                     | 2/2                     | 0          |
| 0/0                     | 0/0                     | 2          |
| 0/0                     | 0/0                     | 2          |
| 0/1                     | 0/0                     | 2          |
| 0/0                     | 0/0                     | 2          |

| Unique to sample type 1 | Unique to sample type 2 |
|-------------------------|-------------------------|
| [10 kb,...)             |                         |
|                         |                         |
| 0/0                     | 0/0                     |
| 0/0                     | 0/0                     |
| 0/0                     | 0/0                     |
| 0/5                     | 2/2                     |
|                         |                         |
| 0/0                     | 0/0                     |
| 0/0                     | 0/0                     |
| 0/1                     | 0/0                     |
| 0/1                     | 0/0                     |



|                 |                     | Concordant |
|-----------------|---------------------|------------|
| Sample type 1   | Sample type 2       |            |
| Blood           | Non-enriched saliva | 2          |
| Blood           | Non-enriched buccal | 3          |
| Enriched saliva | Non-enriched saliva | 1          |
| Enriched buccal | Non-enriched buccal | 0          |
| Blood           | Non-enriched saliva | 0          |
| Blood           | Non-enriched buccal | 0          |
| Enriched saliva | Non-enriched saliva | 0          |
| Enriched buccal | Non-enriched buccal | 0          |

| Unique to sample type 1 | Unique to sample type 2 | Concordant |
|-------------------------|-------------------------|------------|
| [1 kb,5 kb]             |                         |            |
| Deletions               |                         |            |
| 2/2                     | 3/3                     | 4          |
| 1/1                     | 0/0                     | 4          |
| 3/3                     | 4/4                     | 4          |
| 0/0                     | 3/3                     | 0          |
| Duplications            |                         |            |
| 1/1                     | 0/0                     | 0          |
| 1/1                     | 0/2                     | 1          |
| 0/1                     | 0/0                     | 0          |
| 0/0                     | 1/3                     | 0          |

| Unique to sample type 1 | Unique to sample type 2 | Concordant |
|-------------------------|-------------------------|------------|
| [5 kb,10 kb)            |                         |            |
| 0/0                     | 0/0                     | 3          |
| 0/0                     | 1/1                     | 3          |
| 0/0                     | 0/0                     | 3          |
| 0/1                     | 5/5                     | 0          |
| 2/2                     | 0/0                     | 0          |
| 1/1                     | 0/0                     | 0          |
| 0/0                     | 0/0                     | 0          |
| 0/0                     | 0/0                     | 0          |

| Unique to sample type 1 | Unique to sample type 2 |
|-------------------------|-------------------------|
| [10 kb,...)             |                         |
|                         |                         |
| 0/0                     | 0/0                     |
| 0/0                     | 0/0                     |
| 0/2                     | 0/0                     |
| 0/1                     | 3/3                     |
|                         |                         |
| 0/0                     | 0/0                     |
| 0/0                     | 0/0                     |
| 0/0                     | 0/0                     |
| 0/2                     | 0/0                     |

|                 |                     | Concordant |
|-----------------|---------------------|------------|
| Sample type 1   | Sample type 2       |            |
| Blood           | Non-enriched saliva | 2          |
| Blood           | Non-enriched buccal | 5          |
| Enriched saliva | Non-enriched saliva | 1          |
| Enriched buccal | Non-enriched buccal | 2          |
| Blood           | Non-enriched saliva | 1          |
| Blood           | Non-enriched buccal | 1          |
| Enriched saliva | Non-enriched saliva | 1          |
| Enriched buccal | Non-enriched buccal | 1          |

| Unique to sample type 1 | Unique to sample type 2 | Concordant |
|-------------------------|-------------------------|------------|
| [1 kb,5 kb]             |                         |            |
| Deletions               |                         |            |
| 4/4                     | 2/2                     | 6          |
| 1/1                     | 2/2                     | 6          |
| 0/0                     | 3/3                     | 1          |
| 0/0                     | 5/5                     | 4          |
| Duplications            |                         |            |
| 0/0                     | 0/0                     | 1          |
| 0/0                     | 0/3                     | 1          |
| 0/0                     | 0/0                     | 0          |
| 0/0                     | 0/3                     | 0          |

| Unique to sample type 1 | Unique to sample type 2 | Concordant |
|-------------------------|-------------------------|------------|
| [5 kb,10 kb)            |                         |            |
| 1/1                     | 0/0                     | 2          |
| 1/1                     | 0/0                     | 2          |
| 0/0                     | 5/5                     | 0          |
| 0/0                     | 2/2                     | 1          |
| 0/0                     | 0/1                     | 4          |
| 0/0                     | 0/0                     | 4          |
| 0/0                     | 1/2                     | 1          |
| 0/0                     | 1/1                     | 4          |

| Unique to sample type 1 | Unique to sample type 2 |
|-------------------------|-------------------------|
| [10 kb,...)             |                         |
|                         |                         |
| 0/0                     | 0/0                     |
| 0/0                     | 0/0                     |
| 0/0                     | 2/2                     |
| 0/3                     | 1/1                     |
|                         |                         |
| 1/1                     | 0/0                     |
| 1/1                     | 0/0                     |
| 0/2                     | 3/3                     |
| 0/0                     | 0/0                     |



|                 |                     | Concordant |
|-----------------|---------------------|------------|
| Sample type 1   | Sample type 2       |            |
| Blood           | Non-enriched saliva | 145        |
| Blood           | Non-enriched buccal | 98         |
| Enriched saliva | Non-enriched saliva | 134        |
| Enriched buccal | Non-enriched buccal | 37         |
| Blood           | Non-enriched saliva | 25         |
| Blood           | Non-enriched buccal | 20         |
| Enriched saliva | Non-enriched saliva | 26         |
| Enriched buccal | Non-enriched buccal | 7          |

| Unique to sample type 1 | Unique to sample type 2 | Concordant |
|-------------------------|-------------------------|------------|
| [1 kb,5 kb]             |                         |            |
| Deletions               |                         |            |
| 51 (7/7)                | 38 (6/6)                | 69         |
| 98 (11/11)              | 13 (4/4)                | 54         |
| 28 (7/7)                | 49 (3/4)                | 71         |
| 2 (2/2)                 | 75 (7/8)                | 15         |
| Duplications            |                         |            |
| 10 (3/4)                | 4 (1/3)                 | 12         |
| 15 (4/7)                | 11 (2/7)                | 9          |
| 8 (3/6)                 | 3 (2/3)                 | 10         |
| 0 (0/0)                 | 23 (4/11)               | 2          |

| Unique to sample type 1 | Unique to sample type 2 | Concordant |
|-------------------------|-------------------------|------------|
| [5 kb,10 kb)            |                         |            |
|                         |                         |            |
| 8 (5/5)                 | 5 (4/4)                 | 38         |
| 23 (11/11)              | 3 (2/2)                 | 36         |
| 3 (3/3)                 | 3 (3/3)                 | 38         |
| 3 (3/3)                 | 40 (5/5)                | 11         |
|                         |                         |            |
| 3 (0/3)                 | 1 (0/1)                 | 36         |
| 6 (2/6)                 | 2 (0/2)                 | 34         |
| 1 (1/1)                 | 3 (0/3)                 | 35         |
| 1 (1/1)                 | 10 (1/4)                | 20         |

| Unique to sample type 1 | Unique to sample type 2 |
|-------------------------|-------------------------|
| [10 kb,...)             |                         |
|                         |                         |
| 1 (1/1)                 | 0 (0/0)                 |
| 3 (3/3)                 | 4 (2/4)                 |
| 2 (2/2)                 | 0 (0/0)                 |
| 0 (0/0)                 | 30 (5/6)                |
|                         |                         |
| 4 (0/3)                 | 5 (0/4)                 |
| 6 (0/6)                 | 3 (0/3)                 |
| 7 (0/6)                 | 6 (0/6)                 |
| 6 (0/6)                 | 17 (1/5)                |

|                 |                     | Concordant |
|-----------------|---------------------|------------|
| Sample type 1   | Sample type 2       |            |
| Blood           | Non-enriched saliva | 107        |
| Blood           | Non-enriched buccal | 143        |
| Enriched saliva | Non-enriched saliva | 88         |
| Enriched buccal | Non-enriched buccal | 69         |
| Blood           | Non-enriched saliva | 32         |
| Blood           | Non-enriched buccal | 35         |
| Enriched saliva | Non-enriched saliva | 28         |
| Enriched buccal | Non-enriched buccal | 22         |

| Unique to sample type 1 | Unique to sample type 2 | Concordant |
|-------------------------|-------------------------|------------|
| [1 kb,5 kb]             |                         |            |
| Deletions               |                         |            |
| 85 (9/9)                | 12 (5/5)                | 52         |
| 49 (8/8)                | 26 (6/6)                | 72         |
| 48 (6/6)                | 31 (4/4)                | 51         |
| 6 (5/5)                 | 101 (11/11)             | 34         |
| Duplications            |                         |            |
| 7 (2/6)                 | 5 (1/5)                 | 18         |
| 4 (0/3)                 | 4 (1/4)                 | 19         |
| 3 (2/3)                 | 9 (1/5)                 | 14         |
| 2 (0/2)                 | 17 (3/8)                | 9          |

| Unique to sample type 1 | Unique to sample type 2 | Concordant |
|-------------------------|-------------------------|------------|
| [5 kb,10 kb)            |                         |            |
|                         |                         |            |
| 24 (11/11)              | 2 (2/2)                 | 34         |
| 4 (4/4)                 | 2 (2/2)                 | 37         |
| 24 (11/11)              | 3 (3/3)                 | 36         |
| 2 (1/2)                 | 40 (10/10)              | 21         |
|                         |                         |            |
| 2 (2/2)                 | 0 (0/0)                 | 42         |
| 1 (1/1)                 | 1 (1/1)                 | 40         |
| 2 (2/2)                 | 3 (2/3)                 | 38         |
| 0 (0/0)                 | 11 (4/7)                | 34         |

| Unique to sample type 1 | Unique to sample type 2 |
|-------------------------|-------------------------|
| [10 kb,...)             |                         |
|                         |                         |
| 7 (5/5)                 | 3 (3/3)                 |
| 4 (3/3)                 | 2 (2/2)                 |
| 3 (3/3)                 | 1 (1/1)                 |
| 7 (2/4)                 | 17 (5/5)                |
|                         |                         |
| 0 (0/0)                 | 2 (0/2)                 |
| 2 (0/0)                 | 2 (0/2)                 |
| 6 (0/3)                 | 7 (0/4)                 |
| 8 (0/5)                 | 8 (1/4)                 |



|                 |                     | Concordant |
|-----------------|---------------------|------------|
| Sample type 1   | Sample type 2       |            |
| Blood           | Non-enriched saliva | 122        |
| Blood           | Non-enriched buccal | 109        |
| Enriched saliva | Non-enriched saliva | 113        |
| Enriched buccal | Non-enriched buccal | 39         |
| Blood           | Non-enriched saliva | 31         |
| Blood           | Non-enriched buccal | 27         |
| Enriched saliva | Non-enriched saliva | 28         |
| Enriched buccal | Non-enriched buccal | 10         |

| Unique to sample type 1 | Unique to sample type 2 | Concordant |
|-------------------------|-------------------------|------------|
| [1 kb,5 kb]             |                         |            |
| Deletions               |                         |            |
| 39 (7/7)                | 48 (7/7)                | 55         |
| 52 (6/6)                | 39 (5/5)                | 57         |
| 23 (4/4)                | 56 (5/5)                | 53         |
| 4 (4/4)                 | 109 (11/11)             | 16         |
| Duplications            |                         |            |
| 3 (1/3)                 | 5 (3/4)                 | 9          |
| 7 (1/6)                 | 10 (2/6)                | 8          |
| 1 (0/1)                 | 8 (2/5)                 | 9          |
| 1 (0/1)                 | 26 (3/8)                | 3          |

| Unique to sample type 1 | Unique to sample type 2 | Concordant |
|-------------------------|-------------------------|------------|
| [5 kb,10 kb)            |                         |            |
|                         |                         |            |
| 7 (5/5)                 | 4 (4/4)                 | 39         |
| 5 (4/4)                 | 3 (2/2)                 | 39         |
| 7 (4/4)                 | 7 (4/4)                 | 38         |
| 0 (0/0)                 | 44 (10/10)              | 11         |
|                         |                         |            |
| 3 (2/3)                 | 2 (1/2)                 | 35         |
| 4 (3/4)                 | 6 (1/6)                 | 35         |
| 3 (0/3)                 | 2 (2/2)                 | 32         |
| 0 (0/0)                 | 13 (3/10)               | 24         |

| Unique to sample type 1 | Unique to sample type 2 |
|-------------------------|-------------------------|
| [10 kb,...)             |                         |
|                         |                         |
| 2 (2/2)                 | 1 (0/1)                 |
| 2 (2/2)                 | 2 (2/2)                 |
| 2 (2/2)                 | 2 (1/2)                 |
| 0 (0/0)                 | 30 (7/7)                |
|                         |                         |
| 2 (1/2)                 | 1 (0/1)                 |
| 2 (0/1)                 | 3 (0/2)                 |
| 7 (1/4)                 | 4 (1/3)                 |
| 7 (0/4)                 | 13 (2/6)                |

|                 |                     | Concordant |
|-----------------|---------------------|------------|
| Sample type 1   | Sample type 2       |            |
| Blood           | Non-enriched saliva | 89         |
| Blood           | Non-enriched buccal | 110        |
| Enriched saliva | Non-enriched saliva | 24         |
| Enriched buccal | Non-enriched buccal | 64         |
| Blood           | Non-enriched saliva | 19         |
| Blood           | Non-enriched buccal | 23         |
| Enriched saliva | Non-enriched saliva | 3          |
| Enriched buccal | Non-enriched buccal | 10         |

| Unique to sample type 1 | Unique to sample type 2 | Concordant |
|-------------------------|-------------------------|------------|
| [1 kb,5 kb]             |                         |            |
| Deletions               |                         |            |
| 69 (9/9)                | 19 (5/5)                | 46         |
| 48 (10/10)              | 29 (4/4)                | 65         |
| 1 (1/1)                 | 84 (10/10)              | 15         |
| 6 (3/3)                 | 75 (7/7)                | 39         |
| Duplications            |                         |            |
| 14 (4/8)                | 3 (1/3)                 | 10         |
| 10 (2/5)                | 6 (0/5)                 | 12         |
| 0 (0/0)                 | 19 (2/6)                | 0          |
| 0 (0/0)                 | 18 (2/9)                | 8          |

| Unique to sample type 1 | Unique to sample type 2 | Concordant |
|-------------------------|-------------------------|------------|
| [5 kb,10 kb)            |                         |            |
|                         |                         |            |
| 25 (8/8)                | 3 (3/3)                 | 36         |
| 6 (4/4)                 | 5 (4/4)                 | 37         |
| 3 (3/3)                 | 34 (9/9)                | 11         |
| 2 (2/2)                 | 30 (9/9)                | 28         |
|                         |                         |            |
| 5 (2/5)                 | 0 (0/0)                 | 37         |
| 3 (1/3)                 | 1 (0/1)                 | 37         |
| 0 (0/0)                 | 10 (3/4)                | 18         |
| 0 (0/0)                 | 6 (4/6)                 | 32         |

| Unique to sample type 1 | Unique to sample type 2 |
|-------------------------|-------------------------|
| [10 kb,...)             |                         |
|                         |                         |
| 5 (4/4)                 | 0 (0/0)                 |
| 4 (3/3)                 | 1 (1/1)                 |
| 0 (0/0)                 | 25 (6/6)                |
| 5 (2/5)                 | 11 (6/6)                |
|                         |                         |
| 3 (0/3)                 | 6 (0/5)                 |
| 3 (0/3)                 | 3 (1/3)                 |
| 7 (0/4)                 | 25 (3/9)                |
| 12 (0/7)                | 8 (1/4)                 |



| Sample type         | [1 kb,5 kb) | [5 kb,10 kb) |
|---------------------|-------------|--------------|
| Deletions           |             |              |
| Blood               | 4/6         | 13/15        |
| Non-enriched saliva | 7/8         | 16/17        |
| Enriched saliva     | 3/3         | 8/8          |
| Non-enriched buccal | 0/0         | 3/5          |
| Enriched buccal     | 0/0         | 0/0          |
| Duplications        |             |              |
| Blood               | 1/7         | 1/7          |
| Non-enriched saliva | 0/4         | 1/5          |
| Enriched saliva     | 0/5         | 0/7          |
| Non-enriched buccal | 0/3         | 0/9          |
| Enriched buccal     | 0/4         | 0/0          |

|                    |
|--------------------|
| <b>[10 kb,...)</b> |
|                    |
| 15/22              |
| 11/15              |
| 11/15              |
| 7/15               |
| 4/34               |
|                    |
| 1/16               |
| 4/16               |
| 1/14               |
| 1/13               |
| 1/11               |

| Sample type         | [1 kb,5 kb) | [5 kb,10 kb) |
|---------------------|-------------|--------------|
| Deletions           |             |              |
| Blood               | 4/6         | 7/9          |
| Non-enriched saliva | 2/7         | 4/5          |
| Enriched saliva     | 0/1         | 5/7          |
| Non-enriched buccal | 5/10        | 9/11         |
| Enriched buccal     | 0/0         | 1/1          |
| Duplications        |             |              |
| Blood               | 0/3         | 3/9          |
| Non-enriched saliva | 0/2         | 1/2          |
| Enriched saliva     | 1/5         | 0/6          |
| Non-enriched buccal | 0/4         | 3/5          |
| Enriched buccal     | 0/1         | 0/0          |

|                    |
|--------------------|
| <b>[10 kb,...)</b> |
|                    |
| 14/21              |
| 11/19              |
| 10/15              |
| 12/17              |
| 5/51               |
|                    |
| 7/15               |
| 6/20               |
| 7/18               |
| 8/19               |
| 4/15               |

| Sample type         | [1 kb,5 kb) | [5 kb,10 kb) |
|---------------------|-------------|--------------|
| Deletions           |             |              |
| Blood               | 5/7         | 5/7          |
| Non-enriched saliva | 3/7         | 8/10         |
| Enriched saliva     | 0/0         | 3/5          |
| Non-enriched buccal | 2/2         | 6/9          |
| Enriched buccal     | 0/0         | 0/0          |
| Duplications        |             |              |
| Blood               | 1/11        | 1/5          |
| Non-enriched saliva | 2/15        | 1/4          |
| Enriched saliva     | 0/11        | 2/6          |
| Non-enriched buccal | 0/9         | 1/3          |
| Enriched buccal     | 0/7         | 0/4          |

|                    |
|--------------------|
| <b>[10 kb,...)</b> |
|                    |
| 12/15              |
| 12/18              |
| 13/22              |
| 8/16               |
| 3/25               |
|                    |
| 6/17               |
| 3/15               |
| 3/14               |
| 4/16               |
| 2/8                |

| Sample type         | [1 kb,5 kb) | [5 kb,10 kb) |
|---------------------|-------------|--------------|
| Deletions           |             |              |
| Blood               | 2/3         | 8/11         |
| Non-enriched saliva | 3/5         | 7/7          |
| Enriched saliva     | 0/0         | 0/0          |
| Non-enriched buccal | 2/4         | 8/9          |
| Enriched buccal     | 0/1         | 1/1          |
| Duplications        |             |              |
| Blood               | 0/1         | 1/5          |
| Non-enriched saliva | 1/6         | 3/5          |
| Enriched saliva     | 0/2         | 0/3          |
| Non-enriched buccal | 0/4         | 0/4          |
| Enriched buccal     | 0/2         | 0/1          |

|                    |
|--------------------|
| <b>[10 kb,...)</b> |
|                    |
| 15/22              |
| 17/23              |
| 2/11               |
| 16/22              |
| 9/35               |
|                    |
| 4/18               |
| 4/22               |
| 1/20               |
| 6/23               |
| 2/14               |
