# Supplementary material for: Impact of DNA source on genetic variant detection from human whole-genome sequencing data
Source: PubMed Central journal article supplement — J Med Genet. 2019 Sep 12;56(12):809–17. doi: 10.1136/jmedgenet-2019-106281 (PMC6929712; doi:10.1136/jmedgenet-2019-106281), 2019-09-12
Supplement: jmedgenet-2019-106281supp004.pdf [file jmedgenet-2019-106281supp004.pdf]

| CHR | POS       | REF       | ALT | Individual | Known/nove | Detected in t |       |
|-----|-----------|-----------|-----|------------|------------|---------------|-------|
| Y   | 15        | 63178231  | A   | T          | PGPC-0002  | novel         | B_NE  |
|     |           | 13471776  | C   | T          | PGPC-0002  | novel         | B_NE  |
|     | 1         | 174284228 | T   | G          | PGPC-0002  | novel         | B_NE  |
|     | 17        | 21554198  | G   | A          | PGPC-0002  | novel         | B_NE  |
|     | 12        | 60984678  | A   | G          | PGPC-0002  | known         | B_NE  |
|     | 6         | 57410035  | C   | T          | PGPC-0002  | novel         | B_NE  |
|     | 9         | 11577032  | T   | A          | PGPC-0002  | known         | B_NE  |
|     | 11        | 71893039  | A   | C          | PGPC-0002  | known         | B_NE  |
|     | 13        | 72684792  | G   | A          | PGPC-0002  | known         | B_NE  |
|     | 9         | 139297795 | T   | C          | PGPC-0002  | known         | B_NE  |
|     | 7         | 143485941 | A   | G          | PGPC-0002  | known         | B_NE  |
|     | 6         | 57394151  | A   | G          | PGPC-0002  | novel         | S_NE  |
|     | 14        | 47248513  | G   | A          | PGPC-0002  | novel         | B_NE  |
|     | 8         | 12426419  | G   | C          | PGPC-0002  | novel         | B_WE  |
|     | 6         | 5135188   | A   | G          | PGPC-0002  | known         | B_WE  |
|     | 6         | 57335343  | C   | G          | PGPC-0002  | novel         | B_WE  |
|     | 17        | 21304564  | C   | A          | PGPC-0002  | novel         | B_WE  |
|     | 7         | 117550462 | A   | T          | PGPC-0002  | known         | B_WE  |
|     | 12        | 62827820  | C   | T          | PGPC-0002  | novel         | B_WE  |
|     | 11        | 84628787  | G   | A          | PGPC-0002  | known         | B_WE  |
|     | 7         | 158671128 | C   | T          | PGPC-0002  | known         | Blood |
|     | 3         | 118281605 | A   | T          | PGPC-0002  | known         | S_NE  |
|     | 21        | 10911768  | A   | T          | PGPC-0002  | known         | Blood |
|     | 4         | 166115671 | A   | G          | PGPC-0002  | known         | B_NE  |
|     | 6         | 32451753  | C   | T          | PGPC-0002  | novel         | Blood |
|     | 4         | 4041866   | A   | T          | PGPC-0002  | known         | Blood |
|     | 20        | 30250926  | T   | C          | PGPC-0002  | known         | Blood |
|     | 17        | 21556181  | A   | G          | PGPC-0002  | novel         | Blood |
|     | 7         | 100611071 | T   | C          | PGPC-0002  | known         | Blood |
|     | 6         | 32519811  | T   | A          | PGPC-0002  | novel         | Blood |
|     | 9         | 137642980 | G   | A          | PGPC-0050  | known         | S_NE  |
|     | 6         | 57399988  | G   | A          | PGPC-0002  | novel         | S_NE  |
|     | 6         | 61914521  | T   | C          | PGPC-0002  | novel         | S_NE  |
| 17  | 21554977  | A         | G   | PGPC-0002  | novel      | S_NE          |       |
| 10  | 49798218  | C         | G   | PGPC-0002  | known      | S_NE          |       |
| 6   | 114463871 | C         | T   | PGPC-0002  | novel      | S_NE          |       |
| 2   | 151866637 | A         | T   | PGPC-0002  | novel      | S_NE          |       |
| 3   | 122498977 | C         | T   | PGPC-0002  | known      | S_NE          |       |
| 6   | 42599807  | A         | T   | PGPC-0002  | novel      | S_NE          |       |
| 1   | 171620488 | C         | A   | PGPC-0002  | known      | S_NE          |       |

|    |    |           |   |   |           |       |       |
|----|----|-----------|---|---|-----------|-------|-------|
|    | 10 | 42774391  | G | A | PGPC-0002 | novel | S_NE  |
|    | 2  | 196432669 | G | C | PGPC-0002 | known | S_NE  |
|    | 14 | 37822050  | C | G | PGPC-0002 | known | S_NE  |
|    | 17 | 47037254  | C | A | PGPC-0002 | known | S_NE  |
|    | 17 | 21303512  | A | G | PGPC-0002 | novel | S_NE  |
|    | 9  | 76846921  | A | G | PGPC-0002 | novel | B_WE  |
|    | 13 | 111190975 | G | T | PGPC-0002 | novel | S_NE  |
|    | 11 | 99760161  | G | T | PGPC-0002 | known | S_WE  |
|    | 4  | 49207449  | G | T | PGPC-0002 | known | S_WE  |
|    | 14 | 20307689  | A | C | PGPC-0002 | known | S_WE  |
|    | 9  | 111225394 | C | T | PGPC-0005 | known | B_NE  |
|    | 11 | 83258187  | T | C | PGPC-0005 | known | B_NE  |
|    | 7  | 157680216 | C | T | PGPC-0005 | known | B_NE  |
|    | 4  | 49156854  | A | T | PGPC-0005 | novel | B_NE  |
|    | 6  | 57472038  | A | G | PGPC-0005 | novel | B_NE  |
|    | 6  | 57410856  | C | T | PGPC-0005 | novel | B_NE  |
| X  |    | 10564594  | G | A | PGPC-0005 | novel | B_NE  |
|    | 21 | 40681579  | C | T | PGPC-0005 | novel | B_NE  |
|    | 10 | 123714945 | A | G | PGPC-0005 | known | B_WE  |
|    | 6  | 32451196  | T | C | PGPC-0005 | novel | B_WE  |
|    | 6  | 57477910  | G | A | PGPC-0005 | novel | B_WE  |
| MT |    | 16390     | G | A | PGPC-0005 | novel | B_WE  |
|    | 9  | 66461633  | C | T | PGPC-0005 | novel | B_WE  |
|    | 11 | 24979786  | T | C | PGPC-0005 | known | B_WE  |
|    | 2  | 8379316   | C | G | PGPC-0005 | novel | S_NE  |
|    | 5  | 156585082 | A | C | PGPC-0005 | known | Blood |
|    | 6  | 57406639  | T | A | PGPC-0005 | novel | Blood |
|    | 1  | 149252801 | T | C | PGPC-0005 | known | Blood |
|    | 1  | 240134790 | T | C | PGPC-0005 | known | Blood |
|    | 10 | 127847220 | G | A | PGPC-0005 | known | Blood |
|    | 13 | 38416480  | C | T | PGPC-0005 | novel | Blood |
| Y  |    | 13478246  | C | T | PGPC-0005 | novel | Blood |
|    | 6  | 32607657  | G | C | PGPC-0005 | known | Blood |
|    | 1  | 144550868 | C | T | PGPC-0005 | known | Blood |
|    | 6  | 57407252  | C | G | PGPC-0005 | novel | Blood |
|    | 4  | 188353629 | C | G | PGPC-0005 | novel | Blood |
|    | 6  | 53053040  | T | C | PGPC-0005 | novel | Blood |
|    | 7  | 151937345 | G | A | PGPC-0005 | novel | Blood |
|    | 6  | 57390817  | G | A | PGPC-0005 | novel | Blood |
|    | 5  | 32215941  | T | A | PGPC-0005 | known | Blood |
|    | 1  | 195164160 | G | A | PGPC-0005 | known | Blood |

|   |    |           |   |   |           |       |       |
|---|----|-----------|---|---|-----------|-------|-------|
|   | 6  | 35575542  | G | A | PGPC-0005 | novel | S_NE  |
|   | 11 | 116853686 | T | A | PGPC-0005 | known | S_NE  |
|   | 13 | 50296520  | T | G | PGPC-0005 | novel | S_NE  |
|   | 6  | 153494823 | G | A | PGPC-0005 | novel | S_NE  |
|   | 7  | 113317312 | C | T | PGPC-0005 | novel | S_NE  |
|   | 20 | 29436465  | A | C | PGPC-0005 | novel | S_NE  |
|   | 6  | 26815653  | T | C | PGPC-0005 | known | S_NE  |
|   | 14 | 104992524 | A | C | PGPC-0005 | known | S_NE  |
|   | 16 | 74448176  | G | A | PGPC-0005 | known | S_NE  |
|   | 22 | 32299388  | T | C | PGPC-0005 | known | S_NE  |
|   | 6  | 57442990  | G | A | PGPC-0005 | novel | S_WE  |
|   | 2  | 142396034 | C | A | PGPC-0005 | known | S_WE  |
|   | 13 | 76311935  | A | C | PGPC-0005 | novel | B_WE  |
|   | 22 | 44609523  | C | A | PGPC-0005 | known | S_WE  |
|   | 6  | 32553750  | C | G | PGPC-0005 | novel | S_WE  |
|   | 12 | 112319207 | C | T | PGPC-0005 | known | S_WE  |
|   | 5  | 20242712  | A | T | PGPC-0005 | known | S_WE  |
|   | 6  | 32632324  | A | G | PGPC-0005 | novel | S_WE  |
|   | 6  | 32632385  | C | A | PGPC-0006 | novel | B_NE  |
|   | 5  | 62540627  | T | G | PGPC-0006 | novel | B_NE  |
|   | 21 | 21938902  | G | T | PGPC-0006 | known | B_NE  |
|   | 1  | 178681810 | A | G | PGPC-0006 | known | B_NE  |
| X |    | 110818069 | A | G | PGPC-0006 | novel | B_NE  |
|   | 13 | 109218133 | C | T | PGPC-0050 | novel | B_NE  |
|   | 2  | 113876078 | C | G | PGPC-0006 | known | B_NE  |
|   | 11 | 75539850  | A | T | PGPC-0006 | novel | B_NE  |
|   | 3  | 1451449   | C | G | PGPC-0006 | novel | B_NE  |
|   | 12 | 61779392  | A | C | PGPC-0006 | novel | B_NE  |
|   | 12 | 2339806   | A | T | PGPC-0006 | novel | B_NE  |
|   | 6  | 5499020   | A | T | PGPC-0006 | novel | B_NE  |
|   | 2  | 91825487  | G | A | PGPC-0006 | known | B_WE  |
|   | 13 | 47220219  | C | G | PGPC-0006 | novel | B_WE  |
|   | 5  | 178977513 | T | C | PGPC-0006 | novel | B_WE  |
|   | 8  | 75226159  | A | C | PGPC-0006 | known | B_WE  |
|   | 19 | 21832380  | C | G | PGPC-0006 | known | Blood |
|   | 17 | 21318629  | C | T | PGPC-0006 | known | Blood |
|   | 4  | 190294474 | T | A | PGPC-0006 | novel | S_NE  |
|   | 6  | 32543043  | G | A | PGPC-0006 | novel | Blood |
| Y |    | 59004990  | G | C | PGPC-0006 | novel | Blood |
|   | 11 | 102870149 | C | T | PGPC-0006 | novel | Blood |
|   | 14 | 64066431  | C | T | PGPC-0006 | known | Blood |

|   |    |           |   |   |           |       |       |
|---|----|-----------|---|---|-----------|-------|-------|
|   | 7  | 12894055  | A | C | PGPC-0006 | known | Blood |
|   | 15 | 95356999  | T | C | PGPC-0006 | known | Blood |
|   | 20 | 6307732   | A | G | PGPC-0006 | novel | Blood |
|   | 1  | 236796220 | G | T | PGPC-0006 | known | Blood |
|   | 2  | 184392666 | C | A | PGPC-0006 | novel | Blood |
|   | 8  | 649941    | G | A | PGPC-0006 | known | Blood |
|   | 4  | 176768743 | A | G | PGPC-0006 | known | Blood |
|   | 8  | 1130930   | G | A | PGPC-0006 | known | Blood |
|   | 6  | 91380791  | G | A | PGPC-0006 | known | Blood |
|   | 6  | 57470202  | G | A | PGPC-0006 | novel | S_NE  |
|   | 2  | 182010947 | A | G | PGPC-0006 | known | S_NE  |
|   | 1  | 31128111  | A | G | PGPC-0006 | novel | S_NE  |
|   | 8  | 96465195  | C | T | PGPC-0006 | novel | S_NE  |
|   | 9  | 94604338  | A | C | PGPC-0006 | novel | S_NE  |
|   | 12 | 78342468  | A | C | PGPC-0006 | known | S_NE  |
|   | 12 | 15231920  | G | A | PGPC-0006 | known | S_NE  |
|   | 2  | 159269647 | T | G | PGPC-0006 | novel | S_NE  |
|   | 9  | 103341602 | T | C | PGPC-0006 | novel | S_NE  |
|   | 8  | 752036    | A | G | PGPC-0006 | novel | S_NE  |
|   | 22 | 45957047  | C | T | PGPC-0006 | known | S_NE  |
|   | 10 | 18054160  | G | A | PGPC-0006 | known | S_WE  |
|   | 8  | 12448796  | C | T | PGPC-0006 | novel | S_WE  |
|   | 6  | 29925243  | C | G | PGPC-0006 | known | S_WE  |
|   | 2  | 104064668 | A | G | PGPC-0006 | novel | S_WE  |
|   | 21 | 9538267   | C | A | PGPC-0006 | known | S_WE  |
|   | 1  | 143175875 | A | G | PGPC-0006 | novel | S_WE  |
|   | 6  | 57411649  | C | T | PGPC-0050 | novel | B_NE  |
|   | 2  | 156861890 | G | T | PGPC-0050 | novel | B_NE  |
|   | 2  | 101695241 | C | A | PGPC-0050 | known | B_NE  |
|   | 13 | 114841031 | T | G | PGPC-0050 | known | B_NE  |
|   | 6  | 32520099  | G | A | PGPC-0050 | novel | B_NE  |
|   | 6  | 32519878  | A | T | PGPC-0050 | novel | B_NE  |
|   | 6  | 10540762  | T | C | PGPC-0050 | known | B_NE  |
|   | 11 | 18964025  | C | A | PGPC-0050 | known | B_NE  |
| X |    | 71307518  | A | G | PGPC-0050 | novel | B_NE  |
|   | 12 | 49395819  | A | G | PGPC-0050 | novel | B_NE  |
|   | 4  | 46271537  | T | C | PGPC-0050 | novel | B_NE  |
|   | 6  | 32500862  | T | C | PGPC-0050 | known | B_NE  |
|   | 4  | 159415310 | G | A | PGPC-0050 | novel | B_NE  |
|   | 12 | 124901681 | A | G | PGPC-0050 | novel | B_NE  |
|   | 4  | 144770092 | A | G | PGPC-0050 | known | B_NE  |

|   |    |           |   |            |           |       |       |
|---|----|-----------|---|------------|-----------|-------|-------|
|   | 10 | 127584509 | G | A          | PGPC-0050 | known | B_NE  |
|   | 7  | 157639809 | C | T          | PGPC-0050 | known | B_WE  |
|   | 3  | 56732902  | A | T          | PGPC-0050 | novel | B_WE  |
|   | 6  | 32519857  | A | T          | PGPC-0050 | novel | B_WE  |
|   | 6  | 57457779  | G | C          | PGPC-0050 | novel | B_WE  |
|   | 16 | 33535651  | A | C          | PGPC-0050 | novel | B_WE  |
|   | 20 | 129736    | G | A          | PGPC-0050 | known | Blood |
|   | 1  | 212494048 | C | T          | PGPC-0050 | known | Blood |
|   | 2  | 241434794 | G | A          | PGPC-0050 | novel | Blood |
|   | 6  | 57435698  | C | T          | PGPC-0050 | novel | Blood |
|   | 6  | 32541564  | A | G          | PGPC-0050 | novel | Blood |
| X |    | 55313361  | T | C          | PGPC-0050 | known | Blood |
|   | 6  | 50096882  | G | A          | PGPC-0050 | known | Blood |
|   | 6  | 32518914  | T | A          | PGPC-0050 | novel | Blood |
|   | 4  | 149055794 | C | T          | PGPC-0050 | novel | Blood |
| X |    | 23700970  | A | T          | PGPC-0050 | novel | Blood |
|   | 11 | 114839307 | T | C          | PGPC-0050 | known | Blood |
|   | 15 | 99265945  | G | A          | PGPC-0050 | novel | S_NE  |
|   | 13 | 107444007 | C | T          | PGPC-0006 | known | S_NE  |
|   | 10 | 3473425   | T | G          | PGPC-0050 | known | S_NE  |
|   | 5  | 51322694  | A | C          | PGPC-0050 | novel | S_NE  |
| X |    | 116395085 | G | A          | PGPC-0050 | known | S_NE  |
|   | 18 | 2748323   | T | C          | PGPC-0050 | known | S_NE  |
|   | 1  | 192011630 | T | A          | PGPC-0050 | novel | S_NE  |
|   | 7  | 152493972 | T | G          | PGPC-0050 | known | S_WE  |
|   | 7  | 158261703 | C | G          | PGPC-0050 | known | S_WE  |
|   | 1  | 190874464 | G | T          | PGPC-0050 | known | S_WE  |
|   | 6  | 32519792  | A | T          | PGPC-0050 | novel | S_WE  |
|   | 6  | 57403997  | G | A          | PGPC-0050 | novel | S_WE  |
| Y |    | 13690348  | A | T          | PGPC-0050 | novel | S_WE  |
|   | 6  | 169467419 | C | A          | PGPC-0050 | known | S_WE  |
|   | 17 | 21247633  | C | G          | PGPC-0002 | novel | S_WE  |
|   | 3  | 197118097 | G | A          | PGPC-0002 | known | S_NE  |
|   | 4  | 49560744  | C | A          | PGPC-0005 | novel | S_NE  |
|   | 9  | 138870278 | C | T          | PGPC-0005 | known | B_NE  |
|   | 8  | 1509902   | T | A          | PGPC-0006 | known | S_WE  |
|   | 1  | 244537889 | C | T          | PGPC-0002 | novel | B_WE  |
|   | 3  | 194776260 | C | CCCTCCATGA | PGPC-0006 | novel | Blood |
|   | 15 | 24142418  | C | CG         | PGPC-0050 | known | Blood |
| X |    | 114343596 | T | TA         | PGPC-0006 | known | Blood |
|   | 6  | 32549061  | G | GC         | PGPC-0002 | novel | Blood |

|   |    |           |       |            |           |       |       |
|---|----|-----------|-------|------------|-----------|-------|-------|
|   | 10 | 1997895   | AG    | A          | PGPC-0002 | known | Blood |
|   | 14 | 24983000  | C     | CTTCAAATGA | PGPC-0050 | novel | Blood |
|   | 4  | 62707025  | C     | CACTT      | PGPC-0005 | known | Blood |
|   | 4  | 165807303 | A     | AGCTTAAGG  | PGPC-0005 | novel | Blood |
|   | 3  | 162689004 | ATAT  | A          | PGPC-0005 | known | Blood |
|   | 2  | 2523850   | T     | TCAGGACGA  | PGPC-0006 | novel | Blood |
|   | 4  | 66720569  | AAAC  | A          | PGPC-0050 | known | Blood |
|   | 1  | 110985351 | CAT   | C          | PGPC-0005 | known | Blood |
|   | 8  | 108814761 | C     | CAT        | PGPC-0002 | known | Blood |
|   | 6  | 32543024  | AAC   | A          | PGPC-0002 | novel | Blood |
|   | 10 | 42769801  | A     | AC         | PGPC-0005 | novel | Blood |
|   | 10 | 43558523  | TAAA  | T          | PGPC-0006 | known | Blood |
|   | 2  | 715373    | A     | ACCTTCCAGA | PGPC-0050 | novel | Blood |
|   | 21 | 26589170  | TATC  | T          | PGPC-0050 | novel | Blood |
|   | 2  | 142117214 | AC    | A          | PGPC-0005 | known | Blood |
|   | 6  | 116397122 | C     | CTT        | PGPC-0050 | known | Blood |
|   | 9  | 97217465  | A     | ATTTTT     | PGPC-0050 | novel | Blood |
| Y |    | 9985025   | A     | AG         | PGPC-0050 | novel | Blood |
|   | 6  | 32604008  | A     | ATTC       | PGPC-0002 | novel | Blood |
|   | 1  | 27356982  | AT    | A          | PGPC-0006 | known | Blood |
|   | 12 | 4907256   | C     | CT         | PGPC-0050 | known | Blood |
|   | 6  | 32543426  | AT    | A          | PGPC-0005 | novel | S_NE  |
|   | 12 | 106438188 | G     | GTA        | PGPC-0050 | novel | S_NE  |
|   | 7  | 145425773 | T     | TAAAAAGGC  | PGPC-0002 | novel | S_NE  |
|   | 12 | 132582964 | AGTCT | A          | PGPC-0002 | known | S_NE  |
|   | 9  | 31294886  | TAACA | T          | PGPC-0006 | known | S_NE  |
|   | 14 | 39864450  | A     | AAAG       | PGPC-0006 | novel | S_NE  |
|   | 9  | 120316009 | T     | TAAAAAAA   | PGPC-0005 | novel | S_NE  |
|   | 3  | 121976471 | CTG   | C          | PGPC-0006 | known | S_NE  |
|   | 1  | 64061275  | A     | ATCACT     | PGPC-0006 | known | S_NE  |
|   | 6  | 32451922  | T     | TCAC       | PGPC-0002 | novel | S_NE  |
|   | 8  | 16414226  | A     | ATTTTT     | PGPC-0006 | novel | S_NE  |
|   | 16 | 23140719  | CTAAT | C          | PGPC-0005 | known | S_NE  |
|   | 6  | 98334719  | CTT   | C          | PGPC-0002 | known | S_NE  |
|   | 12 | 87313736  | T     | TA         | PGPC-0050 | known | S_NE  |
|   | 2  | 228193036 | AC    | A          | PGPC-0050 | known | S_NE  |
|   | 11 | 73227144  | T     | TA         | PGPC-0050 | known | S_NE  |
|   | 6  | 170258164 | G     | GCTGTGCCTC | PGPC-0002 | novel | S_NE  |
|   | 7  | 99451082  | CT    | C          | PGPC-0006 | known | S_NE  |
|   | 7  | 7637148   | T     | TATATAAAA  | PGPC-0050 | novel | S_NE  |
|   | 12 | 56438149  | T     | TG         | PGPC-0002 | novel | S_NE  |

|   |    |           |             |             |           |       |       |
|---|----|-----------|-------------|-------------|-----------|-------|-------|
|   | 12 | 132897214 | G           | GCCTGGGAG   | PGPC-0006 | novel | S_NE  |
|   | 15 | 81565295  | G           | GTTA        | PGPC-0002 | known | S_NE  |
|   | 2  | 12343711  | A           | ATAGGGGAT   | PGPC-0005 | known | S_NE  |
|   | 7  | 18918325  | TTATACTGAAT |             | PGPC-0050 | novel | S_NE  |
|   | 5  | 28357263  | T           | TCTTGGTAAAP | PGPC-0050 | known | S_NE  |
|   | 10 | 102324323 | C           | CG          | PGPC-0005 | known | Blood |
|   | 17 | 12925316  | A           | AGAATCAGG   | PGPC-0002 | known | Blood |
|   | 10 | 105016976 | CA          | C           | PGPC-0050 | novel | Blood |
|   | 18 | 7172510   | G           | GATATATGAC  | PGPC-0006 | novel | Blood |
|   | 3  | 195539316 | G           | GTGGCAGAC   | PGPC-0050 | novel | Blood |
|   | 11 | 105573416 | C           | CTT         | PGPC-0006 | novel | Blood |
|   | 21 | 9881324   | AC          | A           | PGPC-0050 | novel | Blood |
|   | 8  | 138751997 | G           | GCTTTTGTG   | PGPC-0002 | novel | Blood |
|   | 12 | 113364366 | A           | AG          | PGPC-0002 | known | Blood |
|   | 6  | 164672487 | TGA         | T           | PGPC-0006 | known | Blood |
|   | 13 | 91149408  | A           | AGTGCTTTCA  | PGPC-0002 | novel | Blood |
|   | 10 | 55450239  | AT          | A           | PGPC-0005 | known | Blood |
|   | 2  | 22883125  | ACAAT       | A           | PGPC-0050 | known | Blood |
|   | 8  | 123217509 | C           | CCCAAGACT   | PGPC-0050 | known | Blood |
|   | 15 | 20686631  | AT          | A           | PGPC-0005 | novel | Blood |
|   | 13 | 100746470 | G           | GA          | PGPC-0005 | known | Blood |
|   | 14 | 34766978  | AGGGCAGGAA  |             | PGPC-0005 | known | Blood |
|   | 10 | 106010175 | C           | CT          | PGPC-0002 | novel | Blood |
|   | 6  | 43714420  | CA          | C           | PGPC-0050 | known | Blood |
|   | 11 | 134623601 | CT          | C           | PGPC-0006 | known | Blood |
|   | 5  | 20879520  | A           | ACCT        | PGPC-0002 | known | Blood |
|   | 7  | 481341    | TAA         | T           | PGPC-0002 | known | Blood |
|   | 17 | 39017154  | ATGAATGATCA |             | PGPC-0006 | known | Blood |
| Y |    | 25309865  | C           | CT          | PGPC-0050 | novel | Blood |
|   | 15 | 84838947  | G           | GACAC       | PGPC-0050 | known | Blood |
|   | 7  | 64280463  | G           | GTTCAATTCA  | PGPC-0005 | novel | B_NE  |
|   | 3  | 78267969  | TGGA        | T           | PGPC-0050 | known | B_NE  |
|   | 1  | 176912002 | A           | ATATATATAT  | PGPC-0006 | novel | B_NE  |
|   | 6  | 32594816  | G           | GGAT        | PGPC-0002 | novel | B_NE  |
|   | 1  | 237938281 | C           | CTTTAT      | PGPC-0002 | known | B_NE  |
|   | 6  | 29955301  | TG          | T           | PGPC-0006 | known | B_NE  |
|   | 3  | 159681266 | G           | GTAGCTAGG   | PGPC-0002 | novel | B_NE  |
|   | 14 | 43204475  | G           | GTTC        | PGPC-0005 | known | B_NE  |
|   | 3  | 32044179  | A           | AGTCTAAGA   | PGPC-0006 | novel | B_NE  |
|   | 20 | 59175217  | C           | CCAGGCCCC   | PGPC-0050 | novel | B_NE  |
|   | 4  | 178275405 | G           | GT          | PGPC-0050 | novel | B_NE  |

|   |    |           |           |            |           |       |      |
|---|----|-----------|-----------|------------|-----------|-------|------|
|   | 13 | 71177137  | A         | AT         | PGPC-0002 | known | B_NE |
|   | 6  | 64895264  | T         | TAA        | PGPC-0050 | known | B_NE |
|   | 6  | 343374    | T         | TGGGGCAGC  | PGPC-0005 | novel | B_NE |
|   | 15 | 65192847  | A         | AAAG       | PGPC-0006 | novel | B_NE |
|   | 12 | 59946361  | T         | TG         | PGPC-0050 | novel | B_NE |
|   | 10 | 318411    | AACTC     | A          | PGPC-0006 | known | B_NE |
|   | 6  | 169250530 | GTGGGCAGA | G          | PGPC-0002 | known | B_NE |
|   | 10 | 7829044   | GC        | G          | PGPC-0005 | known | B_NE |
|   | 4  | 84106823  | C         | CGG        | PGPC-0050 | known | B_NE |
|   | 4  | 23721683  | G         | GAGTTCTTAG | PGPC-0005 | novel | B_NE |
| X |    | 155214150 | T         | TCTCTCGGA  | PGPC-0005 | known | B_NE |
|   | 21 | 17183761  | G         | GT         | PGPC-0002 | known | B_NE |
|   | 6  | 57438854  | A         | AG         | PGPC-0050 | novel | B_NE |
|   | 4  | 157644172 | A         | AGACT      | PGPC-0050 | known | B_NE |
|   | 7  | 62654516  | ATGT      | A          | PGPC-0002 | known | S_WE |
|   | 6  | 57490337  | A         | ACT        | PGPC-0006 | novel | S_WE |
|   | 16 | 33519332  | CT        | C          | PGPC-0002 | novel | S_WE |
| Y |    | 58999857  | G         | GA         | PGPC-0006 | novel | S_WE |
|   | 6  | 32473452  | T         | TG         | PGPC-0006 | novel | S_WE |
|   | 6  | 10582963  | TC        | T          | PGPC-0006 | known | S_WE |
|   | 2  | 190494414 | C         | CCCT       | PGPC-0002 | novel | S_WE |
|   | 21 | 36526981  | T         | TAA        | PGPC-0006 | known | S_WE |
|   | 14 | 99132908  | A         | AAAAAAAAA  | PGPC-0005 | novel | S_WE |
|   | 17 | 78575082  | G         | GGGTGTCCC  | PGPC-0050 | novel | S_WE |
|   | 9  | 71179761  | TTCTC     | T          | PGPC-0006 | known | S_WE |
|   | 22 | 35241444  | A         | ATATATATAT | PGPC-0050 | novel | S_WE |
|   | 2  | 166905968 | C         | CTT        | PGPC-0005 | known | S_WE |
|   | 1  | 239487016 | A         | ATATATATAA | PGPC-0002 | novel | S_WE |
|   | 11 | 55884789  | AT        | A          | PGPC-0002 | known | S_WE |
|   | 11 | 68671280  | G         | GCCGCCGCC  | PGPC-0050 | known | S_WE |
|   | 3  | 3873217   | C         | CAAAGCTGG  | PGPC-0006 | novel | S_WE |
|   | 3  | 158982698 | AC        | A          | PGPC-0005 | known | S_WE |
|   | 9  | 43770249  | AAG       | A          | PGPC-0005 | known | S_WE |
|   | 11 | 82892837  | TAC       | T          | PGPC-0006 | known | S_WE |
|   | 6  | 30416350  | A         | AAGGGTGAC  | PGPC-0005 | novel | S_WE |
|   | 11 | 17092011  | AG        | A          | PGPC-0005 | known | S_WE |
|   | 8  | 2216030   | GGCAGCAGA | G          | PGPC-0002 | novel | S_WE |
|   | 1  | 121402993 | CA        | C          | PGPC-0002 | known | S_WE |
|   | 1  | 9159714   | G         | GGCCAGTGC  | PGPC-0050 | novel | S_WE |
|   | 8  | 99496310  | C         | CTTAAAGACT | PGPC-0050 | known | S_NE |
|   | 13 | 43451581  | A         | ACC        | PGPC-0002 | novel | S_NE |



|   |    |           |         |            |           |       |      |
|---|----|-----------|---------|------------|-----------|-------|------|
|   | 8  | 3377336   | GT      | G          | PGPC-0005 | known | S_NE |
|   | 18 | 21440656  | GA      | G          | PGPC-0005 | novel | S_NE |
|   | 1  | 15759219  | CA      | C          | PGPC-0005 | known | S_NE |
|   | 7  | 115672337 | CTCTA   | C          | PGPC-0050 | novel | S_NE |
|   | 1  | 226329181 | ATT     | A          | PGPC-0006 | known | S_NE |
|   | 8  | 605791    | TTC     | T          | PGPC-0006 | known | S_NE |
|   | 1  | 23207028  | CAA     | C          | PGPC-0006 | novel | S_NE |
|   | 19 | 22285496  | G       | GT         | PGPC-0050 | novel | S_NE |
|   | 5  | 103926697 | G       | GCGACA     | PGPC-0006 | novel | S_NE |
|   | 13 | 100784524 | C       | CCATTACCCC | PGPC-0006 | novel | S_NE |
|   | 21 | 46153301  | G       | GGCATCT    | PGPC-0005 | known | S_NE |
|   | 6  | 11903452  | G       | GAAAAGGAA  | PGPC-0005 | novel | S_NE |
|   | 12 | 90846389  | G       | GTACTATGAC | PGPC-0005 | novel | S_NE |
|   | 18 | 3442283   | G       | GT         | PGPC-0006 | known | S_NE |
|   | 12 | 51487223  | A       | AT         | PGPC-0006 | known | S_NE |
|   | 6  | 32504428  | TGA     | T          | PGPC-0050 | novel | S_NE |
|   | 1  | 50847887  | C       | CT         | PGPC-0050 | known | S_NE |
|   | 2  | 142249660 | A       | AAAAAAAAA  | PGPC-0002 | novel | S_NE |
|   | 10 | 97993262  | AC      | A          | PGPC-0006 | known | S_NE |
|   | 9  | 39143166  | T       | TCA        | PGPC-0002 | known | S_NE |
|   | 11 | 117947224 | TG      | T          | PGPC-0002 | known | S_NE |
|   | 4  | 133125924 | CTGTT   | C          | PGPC-0002 | known | S_NE |
|   | 8  | 112755570 | A       | ATCT       | PGPC-0050 | known | S_NE |
| Y |    | 3720338   | C       | CT         | PGPC-0050 | novel | B_WE |
|   | 12 | 101954375 | TG      | T          | PGPC-0050 | known | B_WE |
|   | 16 | 32529960  | TGA     | T          | PGPC-0050 | novel | B_WE |
|   | 15 | 20635661  | CA      | C          | PGPC-0006 | known | B_WE |
|   | 21 | 19275434  | T       | TAAATAGAA  | PGPC-0050 | novel | B_WE |
|   | 2  | 228404173 | A       | AAAAAAAAAC | PGPC-0006 | known | B_WE |
|   | 8  | 134465077 | G       | GCCACCCCCA | PGPC-0006 | novel | B_WE |
|   | 4  | 4170469   | GC      | G          | PGPC-0002 | novel | B_WE |
|   | 6  | 38319280  | G       | GTTT       | PGPC-0002 | novel | B_WE |
|   | 21 | 43999638  | T       | TCATCAGACA | PGPC-0005 | novel | B_WE |
|   | 2  | 168420036 | C       | CCG        | PGPC-0002 | known | B_WE |
|   | 19 | 39407225  | A       | AG         | PGPC-0006 | known | B_WE |
|   | 12 | 85243634  | ATTTCAG | A          | PGPC-0050 | known | B_WE |
|   | 3  | 89022346  | A       | ATTTTATTTT | PGPC-0006 | novel | B_WE |
|   | 10 | 6210979   | G       | GCACGATCTC | PGPC-0006 | novel | B_WE |
|   | 8  | 137801535 | TGAAAA  | T          | PGPC-0005 | known | B_WE |
|   | 3  | 90459262  | TC      | T          | PGPC-0002 | known | B_WE |
|   | 5  | 493889    | G       | GC         | PGPC-0002 | known | B_WE |

|   |    |                   |            |           |       |      |
|---|----|-------------------|------------|-----------|-------|------|
|   | 21 | 10699426 TAGAC    | T          | PGPC-0005 | novel | B_WE |
|   | 2  | 188045463 A       | ATATCATGCA | PGPC-0006 | known | B_WE |
|   | 7  | 29720482 A        | AG         | PGPC-0005 | known | B_WE |
|   | 12 | 79289021 T        | TA         | PGPC-0002 | known | B_WE |
|   | 13 | 111131743 C       | CGGGGAGAA  | PGPC-0050 | novel | B_WE |
|   | 5  | 101557074 G       | GT         | PGPC-0002 | novel | B_WE |
|   | 12 | 90762875 CATGAAT  | C          | PGPC-0002 | known | B_WE |
|   | 7  | 6944295 A         | ACAAGTACTC | PGPC-0050 | novel | B_NE |
|   | 11 | 22333679 A        | AGAGAGAGA  | PGPC-0050 | novel | B_NE |
|   | 16 | 62797803 A        | AAAGTTTAC  | PGPC-0005 | known | B_NE |
|   | 8  | 2243104 CATGGGGAA | C          | PGPC-0005 | novel | B_NE |
|   | 9  | 117782744 TC      | T          | PGPC-0050 | novel | B_NE |
|   | 13 | 89438772 G        | GTTTT      | PGPC-0006 | novel | B_NE |
|   | 10 | 1209482 C         | CTGTGCTCGT | PGPC-0006 | novel | B_NE |
|   | 14 | 99132908 A        | AAAAAAAAA  | PGPC-0005 | novel | B_NE |
| Y |    | 5862555 CAT       | C          | PGPC-0005 | novel | B_NE |
|   | 2  | 133108115 CT      | C          | PGPC-0002 | novel | B_NE |
|   | 22 | 29873975 A        | AG         | PGPC-0002 | novel | B_NE |
|   | 9  | 132276934 G       | GCTGCAGAG  | PGPC-0006 | novel | B_NE |
|   | 2  | 16353626 CA       | C          | PGPC-0050 | known | B_NE |
|   | 10 | 125866034 C       | CT         | PGPC-0005 | known | B_NE |
|   | 20 | 61207306 C        | CGCCCTGCTC | PGPC-0006 | known | B_NE |
|   | 22 | 30281367 GA       | G          | PGPC-0005 | known | B_NE |
|   | 6  | 148630239 A       | AT         | PGPC-0006 | known | B_NE |
|   | 18 | 25446224 A        | ACT        | PGPC-0002 | known | B_NE |
|   | 10 | 57468148 AT       | A          | PGPC-0006 | known | B_NE |
|   | 14 | 60593068 T        | TTATG      | PGPC-0002 | novel | B_NE |
|   | 9  | 122531845 C       | CAAGGAAAA  | PGPC-0006 | novel | B_NE |
|   | 4  | 158843461 G       | GT         | PGPC-0002 | known | B_NE |
|   | 6  | 32557229 CA       | C          | PGPC-0005 | novel | B_NE |
|   | 12 | 72955104 CTA      | C          | PGPC-0006 | known | B_NE |
|   | 1  | 145183682 TG      | T          | PGPC-0002 | known | B_NE |

**...but not thi Variant type TRUE/FALSE**

|       |     |       |
|-------|-----|-------|
| B_WE  | SNV | TRUE  |
| B_WE  | SNV | FALSE |
| B_WE  | SNV | FALSE |
| Blood | SNV | FALSE |
| B_WE  | SNV | TRUE  |
| B_WE  | SNV | TRUE  |
| Blood | SNV | TRUE  |
| B_WE  | SNV | FALSE |
| B_WE  | SNV | TRUE  |
| B_WE  | SNV | FALSE |
| Blood | SNV | TRUE  |
| Blood | SNV | TRUE  |
| Blood | SNV | FALSE |
| B_NE  | SNV | TRUE  |
| B_NE  | SNV | FALSE |
| B_NE  | SNV | TRUE  |
| B_NE  | SNV | TRUE  |
| B_NE  | SNV | FALSE |
| Blood | SNV | FALSE |
| S_NE  | SNV | TRUE  |
| Blood | SNV | TRUE  |
| S_NE  | SNV | FALSE |
| S_NE  | SNV | TRUE  |
| B_NE  | SNV | FALSE |
| B_NE  | SNV | FALSE |
| S_NE  | SNV | FALSE |
| B_NE  | SNV | FALSE |
| S_WE  | SNV | FALSE |
| S_WE  | SNV | TRUE  |
| S_WE  | SNV | FALSE |
| Blood | SNV | TRUE  |
| Blood | SNV | TRUE  |
| Blood | SNV | FALSE |
| S_WE  | SNV | FALSE |
| Blood | SNV | FALSE |
| Blood | SNV | FALSE |
| Blood | SNV | FALSE |

|       |     |       |
|-------|-----|-------|
| S_WE  | SNV | TRUE  |
| S_WE  | SNV | FALSE |
| Blood | SNV | FALSE |
| Blood | SNV | FALSE |
| S_WE  | SNV | FALSE |
| B_NE  | SNV | TRUE  |
| S_WE  | SNV | FALSE |
| S_NE  | SNV | TRUE  |
| S_NE  | SNV | FALSE |
| S_NE  | SNV | TRUE  |
| Blood | SNV | FALSE |
| Blood | SNV | TRUE  |
| B_WE  | SNV | FALSE |
| B_WE  | SNV | FALSE |
| Blood | SNV | TRUE  |
| Blood | SNV | TRUE  |
| B_WE  | SNV | FALSE |
| Blood | SNV | FALSE |
| B_NE  | SNV | FALSE |
| B_NE  | SNV | FALSE |
| B_NE  | SNV | TRUE  |
| B_NE  | SNV | FALSE |
| B_NE  | SNV | TRUE  |
| B_NE  | SNV | TRUE  |
| S_WE  | SNV | FALSE |
| B_NE  | SNV | TRUE  |
| S_NE  | SNV | FALSE |
| B_NE  | SNV | TRUE  |
| S_NE  | SNV | FALSE |
| B_NE  | SNV | FALSE |
| S_NE  | SNV | FALSE |
| S_NE  | SNV | FALSE |
| S_NE  | SNV | FALSE |
| B_NE  | SNV | TRUE  |
| S_NE  | SNV | FALSE |

|       |     |       |
|-------|-----|-------|
| Blood | SNV | FALSE |
| S_WE  | SNV | FALSE |
| S_WE  | SNV | FALSE |
| S_WE  | SNV | FALSE |
| Blood | SNV | FALSE |
| Blood | SNV | FALSE |
| Blood | SNV | TRUE  |
| S_WE  | SNV | FALSE |
| S_WE  | SNV | FALSE |
| S_WE  | SNV | FALSE |
| S_NE  | SNV | FALSE |
| S_NE  | SNV | TRUE  |
| B_NE  | SNV | FALSE |
| S_NE  | SNV | FALSE |
| Blood | SNV | FALSE |
| B_WE  | SNV | FALSE |
| Blood | SNV | TRUE  |
| Blood | SNV | FALSE |
| Blood | SNV | FALSE |
| B_WE  | SNV | FALSE |
| B_WE  | SNV | TRUE  |
| Blood | SNV | FALSE |
| B_WE  | SNV | FALSE |
| Blood | SNV | FALSE |
| Blood | SNV | FALSE |
| B_NE  | SNV | TRUE  |
| B_NE  | SNV | FALSE |
| B_NE  | SNV | FALSE |
| B_NE  | SNV | TRUE  |
| B_NE  | SNV | TRUE  |
| S_NE  | SNV | TRUE  |
| Blood | SNV | FALSE |
| B_NE  | SNV | FALSE |
| S_NE  | SNV | FALSE |
| B_NE  | SNV | FALSE |
| B_NE  | SNV | TRUE  |

|       |     |       |
|-------|-----|-------|
| S_NE  | SNV | TRUE  |
| B_NE  | SNV | FALSE |
| B_NE  | SNV | TRUE  |
| S_NE  | SNV | FALSE |
| B_NE  | SNV | FALSE |
| S_NE  | SNV | FALSE |
| B_NE  | SNV | TRUE  |
| B_NE  | SNV | FALSE |
| S_NE  | SNV | TRUE  |
| S_WE  | SNV | TRUE  |
| Blood | SNV | FALSE |
| Blood | SNV | FALSE |
| S_WE  | SNV | FALSE |
| Blood | SNV | FALSE |
| Blood | SNV | TRUE  |
| Blood | SNV | TRUE  |
| S_WE  | SNV | FALSE |
| Blood | SNV | FALSE |
| Blood | SNV | FALSE |
| S_WE  | SNV | FALSE |
| S_NE  | SNV | TRUE  |
| S_NE  | SNV | TRUE  |
| S_NE  | SNV | FALSE |
| Blood | SNV | FALSE |
| B_WE  | SNV | FALSE |
| Blood | SNV | FALSE |
| Blood | SNV | FALSE |
| B_WE  | SNV | FALSE |
| Blood | SNV | FALSE |
| B_WE  | SNV | FALSE |
| Blood | SNV | FALSE |
| B_WE  | SNV | FALSE |
| B_WE  | SNV | FALSE |
| Blood | SNV | FALSE |
| Blood | SNV | FALSE |
| B_WE  | SNV | TRUE  |
| Blood | SNV | FALSE |
| B_WE  | SNV | TRUE  |

|       |       |       |
|-------|-------|-------|
| B_WE  | SNV   | TRUE  |
| B_NE  | SNV   | FALSE |
| B_NE  | SNV   | FALSE |
| B_NE  | SNV   | FALSE |
| B_NE  | SNV   | TRUE  |
| B_NE  | SNV   | FALSE |
| S_NE  | SNV   | FALSE |
| B_NE  | SNV   | FALSE |
| B_NE  | SNV   | FALSE |
| B_NE  | SNV   | TRUE  |
| S_NE  | SNV   | FALSE |
| B_NE  | SNV   | TRUE  |
| B_NE  | SNV   | TRUE  |
| S_NE  | SNV   | FALSE |
| S_NE  | SNV   | FALSE |
| S_NE  | SNV   | FALSE |
| S_NE  | SNV   | TRUE  |
| Blood | SNV   | FALSE |
| Blood | SNV   | TRUE  |
| Blood | SNV   | FALSE |
| S_WE  | SNV   | FALSE |
| S_WE  | SNV   | TRUE  |
| S_WE  | SNV   | FALSE |
| S_WE  | SNV   | FALSE |
| S_NE  | SNV   | TRUE  |
| S_NE  | SNV   | TRUE  |
| S_WE  | SNV   | FALSE |
| S_WE  | SNV   | FALSE |
| B_WE  | SNV   | FALSE |
| S_NE  | SNV   | FALSE |
| B_NE  | SNV   | FALSE |
| S_NE  | indel | FALSE |
| S_NE  | indel | TRUE  |
| S_NE  | indel | TRUE  |
| S_NE  | indel | FALSE |





|       |       |         |
|-------|-------|---------|
| Blood | indel | TRUE    |
| Blood | indel | FALSE   |
| Blood | indel | TRUE    |
| Blood | indel | TRUE    |
| Blood | indel | TRUE    |
| B_NE  | indel | FALSE   |
| B_NE  | indel | TRUE    |
| B_NE  | indel | FALSE   |
| B_NE  | indel | TRUE    |
| B_NE  | indel | TRUE    |
| B_NE  | indel | UNCLEAR |
| B_NE  | indel | FALSE   |
| B_NE  | indel | TRUE    |
| B_NE  | indel | UNCLEAR |
| B_NE  | indel | TRUE    |
| B_NE  | indel | FALSE   |
| B_NE  | indel | TRUE    |
| Blood | indel | TRUE    |
| Blood | indel | UNCLEAR |
| Blood | indel | TRUE    |
| Blood | indel | TRUE    |
| Blood | indel | TRUE    |
| Blood | indel | FALSE   |
| Blood | indel | TRUE    |

|       |       |       |
|-------|-------|-------|
| Blood | indel | TRUE  |
| Blood | indel | FALSE |
| Blood | indel | TRUE  |
| Blood | indel | FALSE |
| Blood | indel | FALSE |
| Blood | indel | FALSE |
| Blood | indel | TRUE  |
| Blood | indel | TRUE  |
| Blood | indel | TRUE  |
| S_NE  | indel | FALSE |
| S_NE  | indel | TRUE  |
| S_NE  | indel | FALSE |
| S_NE  | indel | TRUE  |
| S_NE  | indel | FALSE |
| S_NE  | indel | TRUE  |
| S_NE  | indel | FALSE |
| S_NE  | indel | TRUE  |
| S_NE  | indel | TRUE  |
| S_NE  | indel | FALSE |
| S_NE  | indel | FALSE |
| S_NE  | indel | FALSE |
| S_NE  | indel | TRUE  |
| S_WE  | indel | TRUE  |
| S_WE  | indel | FALSE |



|      |       |       |
|------|-------|-------|
| B_NE | indel | TRUE  |
| B_NE | indel | FALSE |
| B_NE | indel | TRUE  |
| B_WE | indel | TRUE  |
| B_WE | indel | FALSE |
| B_WE | indel | TRUE  |
| B_WE | indel | FALSE |
| B_WE | indel | TRUE  |
| B_WE | indel | FALSE |
| B_WE | indel | TRUE  |
| B_WE | indel | FALSE |
| B_WE | indel | TRUE  |
| B_WE | indel | FALSE |
| B_WE | indel | TRUE  |
| B_WE | indel | FALSE |
| B_WE | indel | TRUE  |
| B_WE | indel | TRUE  |

| CHR | POS | REF         | ALT | Individual | Known/nove | Detected in t |
|-----|-----|-------------|-----|------------|------------|---------------|
|     | 1   | 234614111 C | G   | PGPC-0002  | novel      | S_NE          |
|     | 1   | 234614116 C | T   | PGPC-0002  | novel      | S_NE          |
|     | 15  | 63353969 G  | T   | PGPC-0002  | novel      | S_NE          |
|     | 15  | 63353953 A  | G   | PGPC-0002  | novel      | S_NE          |
|     | 15  | 63353952 A  | G   | PGPC-0002  | novel      | S_NE          |
| Y   |     | 2846858 T   | C   | PGPC-0002  | novel      | S_NE          |
|     | 1   | 110301964 C | T   | PGPC-0002  | novel      | S_NE          |
|     | 1   | 234614122 T | G   | PGPC-0002  | novel      | S_NE          |
|     | 1   | 33625541 G  | C   | PGPC-0002  | novel      | S_NE          |
|     | 1   | 234614135 T | G   | PGPC-0002  | novel      | S_NE          |
|     | 1   | 234614155 A | C   | PGPC-0002  | novel      | S_NE          |
|     | 9   | 34372598 A  | T   | PGPC-0002  | novel      | S_NE          |
|     | 1   | 234614131 A | G   | PGPC-0002  | novel      | S_NE          |
|     | 1   | 33625526 C  | A   | PGPC-0002  | novel      | S_NE          |
|     | 1   | 234744635 C | G   | PGPC-0002  | novel      | S_NE          |
| X   |     | 53350304 C  | A   | PGPC-0005  | novel      | S_NE          |
|     | 6   | 16327915 A  | C   | PGPC-0005  | novel      | S_NE          |
|     | 19  | 15905029 G  | T   | PGPC-0005  | novel      | S_NE          |
|     | 2   | 135744628 C | A   | PGPC-0005  | novel      | S_NE          |
|     | 5   | 140475227 C | G   | PGPC-0005  | novel      | S_NE          |
| X   |     | 41075484 T  | C   | PGPC-0005  | novel      | S_NE          |
|     | 9   | 127660863 A | G   | PGPC-0005  | novel      | S_NE          |
|     | 22  | 29932642 G  | A   | PGPC-0005  | novel      | S_NE          |
|     | 2   | 167055396 T | G   | PGPC-0005  | novel      | S_NE          |
|     | 9   | 34490117 G  | T   | PGPC-0005  | novel      | S_NE          |
|     | 15  | 41277604 T  | G   | PGPC-0005  | novel      | S_NE          |
|     | 15  | 30001215 C  | G   | PGPC-0005  | novel      | S_NE          |
|     | 3   | 52293859 A  | C   | PGPC-0005  | novel      | S_NE          |
|     | 1   | 115537618 A | C   | PGPC-0005  | novel      | S_NE          |
|     | 8   | 52252247 G  | C   | PGPC-0005  | novel      | S_NE          |
|     | 2   | 61147567 A  | C   | PGPC-0006  | novel      | S_NE          |
|     | 4   | 13603510 C  | T   | PGPC-0006  | novel      | S_NE          |
|     | 2   | 158595041 G | T   | PGPC-0006  | novel      | S_NE          |
|     | 13  | 39264869 G  | T   | PGPC-0006  | novel      | S_NE          |
|     | 13  | 39264867 C  | A   | PGPC-0006  | novel      | S_NE          |
|     | 3   | 51671306 T  | A   | PGPC-0006  | novel      | S_NE          |
|     | 9   | 132402850 A | C   | PGPC-0006  | novel      | S_NE          |
|     | 1   | 17314930 A  | G   | PGPC-0006  | novel      | S_NE          |
| X   |     | 153762607 T | A   | PGPC-0006  | novel      | S_NE          |
|     | 1   | 231556991 C | T   | PGPC-0006  | novel      | S_NE          |
|     | 3   | 183907460 A | C   | PGPC-0006  | novel      | S_NE          |
|     | 1   | 17314920 T  | G   | PGPC-0006  | novel      | S_NE          |
|     | 1   | 231556979 C | A   | PGPC-0006  | novel      | S_NE          |
|     | 22  | 30188449 T  | G   | PGPC-0006  | novel      | S_NE          |
|     | 16  | 28331521 G  | C   | PGPC-0006  | novel      | S_NE          |

|   |    |             |   |           |       |      |
|---|----|-------------|---|-----------|-------|------|
| X |    | 73811809 T  | C | PGPC-0050 | novel | S_NE |
|   | 21 | 38538731 G  | T | PGPC-0050 | novel | S_NE |
|   | 15 | 40328587 C  | T | PGPC-0050 | novel | S_NE |
|   | 17 | 67189359 A  | T | PGPC-0050 | novel | S_NE |
|   | 3  | 51464964 A  | T | PGPC-0050 | novel | S_NE |
|   | 3  | 108159948 A | G | PGPC-0050 | novel | S_NE |
|   | 9  | 35043781 G  | A | PGPC-0050 | novel | S_NE |
|   | 8  | 41906036 C  | A | PGPC-0050 | novel | S_NE |
|   | 20 | 2559852 A   | T | PGPC-0050 | novel | S_NE |
| X |    | 23411602 C  | G | PGPC-0050 | novel | S_NE |
|   | 1  | 109337475 A | C | PGPC-0050 | novel | S_NE |
|   | 9  | 127660906 T | C | PGPC-0050 | novel | S_NE |
|   | 12 | 57036568 G  | C | PGPC-0050 | novel | S_NE |
| X |    | 57474974 G  | A | PGPC-0050 | novel | S_NE |
|   | 1  | 197059515 A | T | PGPC-0050 | novel | S_NE |

**...but not this: Variant type SNV due to s Gene**

|       |     |         |          |
|-------|-----|---------|----------|
| Blood | SNV | Yes     | TARPB1   |
| Blood | SNV | Yes     | TARPB1   |
| Blood | SNV | Yes     | TPM1     |
| Blood | SNV | Yes     | TPM1     |
| Blood | SNV | Yes     | TPM1     |
| Blood | SNV | Yes     | ZFY      |
| Blood | SNV | No      | EPS8L3   |
| Blood | SNV | Yes     | TARBP1   |
| Blood | SNV | Yes     | TRIM62   |
| Blood | SNV | Yes     | TARPB1   |
| Blood | SNV | Yes     | TARPB1   |
| Blood | SNV | Yes     | KIAA1161 |
| Blood | SNV | Yes     | TARPB1   |
| Blood | SNV | Yes     | TRIM62   |
| Blood | SNV | Yes     | TARPB1   |
| Blood | SNV | Yes     | IQSEC2   |
| Blood | SNV | No      | ATXN1    |
| Blood | SNV | Yes     | OR10H5   |
| Blood | SNV | Yes     | MAP3K19  |
| Blood | SNV | Yes     | PCDHB2   |
| Blood | SNV | Yes     | USP9X    |
| Blood | SNV | Yes     | GOLGA1   |
| Blood | SNV | Yes     | THOC5    |
| Blood | SNV | Yes     | SCN9A    |
| Blood | SNV | Yes     | DNAI1    |
| Blood | SNV | Yes     | INO80    |
| Blood | SNV | Yes     | TJP1     |
| Blood | SNV | Yes     | WDR82    |
| Blood | SNV | Yes     | SYCP1    |
| Blood | SNV | Yes     | PXDNL    |
| Blood | SNV | Unclear | REL      |
| Blood | SNV | No      | BOD1L1   |
| Blood | SNV | No      | ACVR1    |
| Blood | SNV | Yes     | FREM2    |
| Blood | SNV | Yes     | FREM2    |
| Blood | SNV | Yes     | RAD54L2  |
| Blood | SNV | Yes     | ASB6     |
| Blood | SNV | Unclear | ATP13A2  |
| Blood | SNV | Yes     | G6PD     |
| Blood | SNV | Yes     | EGLN1    |
| Blood | SNV | Yes     | ABCF3    |
| Blood | SNV | Yes     | ATP13A2  |
| Blood | SNV | Yes     | EGLN1    |
| Blood | SNV | Yes     | ASCC2    |
| Blood | SNV | Yes     | SBK1     |

|       |     |         |          |
|-------|-----|---------|----------|
| Blood | SNV | Unclear | RLIM     |
| Blood | SNV | Yes     | TTC3     |
| Blood | SNV | Yes     | SRP14    |
| Blood | SNV | Yes     | ABCA10   |
| Blood | SNV | Yes     | VPRBP    |
| Blood | SNV | Yes     | MYH15    |
| Blood | SNV | Yes     | C9Orf131 |
| Blood | SNV | Yes     | KAT6A    |
| Blood | SNV | Yes     | TMC2     |
| Blood | SNV | Yes     | PTCHD1   |
| Blood | SNV | Yes     | STXBP3   |
| Blood | SNV | Yes     | GOLGA1   |
| Blood | SNV | Yes     | ATP5B    |
| Blood | SNV | Yes     | FAAH2    |
| Blood | SNV | Yes     | ASPM     |
