# Supplementary material for: Impact of DNA source on genetic variant detection from human whole-genome sequencing data
Source: PubMed Central journal article supplement — J Med Genet. 2019 Sep 12;56(12):809–17. doi: 10.1136/jmedgenet-2019-106281 (PMC6929712; doi:10.1136/jmedgenet-2019-106281), 2019-09-12
Supplement: jmedgenet-2019-106281supp005.pdf [file jmedgenet-2019-106281supp005.pdf]

|           |                                          |
|-----------|------------------------------------------|
| PGPC-0005 | Epilepsy, myoclonic juvenile; Epilepsy,  |
| PGPC-0005 | Leukoencephalopathy, cystic, without     |
| PGPC-0005 | Shwachman-Diamond syndrome; Apl          |
| PGPC-0005 | Pendred syndrome; Deafness, autosol      |
| PGPC-0005 | Short -rib thoracic dysplasia 11 with o  |
| PGPC-0005 | Hyperoxaluria, primary, type III         |
| PGPC-0005 | Myoclonic dystonia                       |
| PGPC-0005 | Leber congenital amaurosis 10; Mecke     |
| PGPC-0005 | Niemann-pick disease, type C2            |
| PGPC-0005 | Amyotrophic lateral sclerosis 5, juveni  |
| PGPC-0005 | Progressive external ophthalmoplegia     |
| PGPC-0005 | Tuberous sclerosis 2; Lymphangioleior    |
| PGPC-0005 | Familial juvenile hyperuricemic nephri   |
| PGPC-0005 | Dyskeratosis congenita, autosomal do     |
| PGPC-0005 | Macular dystrophy, corneal, 1; Macula    |
| PGPC-0005 | Ichthyosiform erythroderma, congenit     |
| PGPC-0005 | Cardiomyopathy, dilated, 1N; Cardiorr    |
| PGPC-0005 | Breast-ovarian cancer, familial, suscep  |
| PGPC-0005 | Paramyotonia congenita; Hyperkalem       |
| PGPC-0005 | Hemophagocytic lymphohistiocytosis,      |
| PGPC-0005 | Camurati-Engelmann disease               |
| PGPC-0005 | Amyotrophic lateral sclerosis 8; Spinal  |
| PGPC-0005 | Epiphyseal dysplasia, multiple, 3        |
| PGPC-0005 | Li-Fraumeni syndrome 2                   |
| PGPC-0005 | Glucose/galactose malabsorption          |
| PGPC-0005 | Acyl-CoA dehydrogenase family, mem       |
| PGPC-0006 | Nephronophthisis 4; Senior-Loken syn     |
| PGPC-0006 | Amyotrophic lateral sclerosis 10, with   |
| PGPC-0006 | Homocystinuria due to MTHFR deficie      |
| PGPC-0006 | Cone-rod dystrophy 3; Retinitis pigme    |
| PGPC-0006 | Coenzyme Q10 deficiency; Progressiv      |
| PGPC-0006 | Ehlers-Danlos syndrome, type IV          |
| PGPC-0006 | Ichthyosis, harlequin; Ichthyosis, lame  |
| PGPC-0006 | Hemolytic uremic syndrome, atypical;     |
| PGPC-0006 | Growth hormone insensitivity syndror     |
| PGPC-0006 | Glucocorticoid resistance                |
| PGPC-0006 | Leukoencephalopathy, cystic, without     |
| PGPC-0006 | Ciliary dyskinesia, primary, 6           |
| PGPC-0006 | Exostoses, multiple, type 1              |
| PGPC-0006 | Refsum disease                           |
| PGPC-0006 | Niemann-Pick disease, type A; Niemar     |
| PGPC-0006 | T cell-negative, B cell-negative, natura |
| PGPC-0006 | Vitreoretinopathy, neovascular inflam    |
| PGPC-0006 | Deafness, autosomal recessive 2; Ush     |

|           |                                         |
|-----------|-----------------------------------------|
| PGPC-0006 | Hydroxymethylbilane synthase deficie    |
| PGPC-0006 | Retinal cone dystrophy 4                |
| PGPC-0006 | Lethal congenital contracture syndron   |
| PGPC-0006 | Deafness, autosomal recessive 1A; De    |
| PGPC-0006 | Spastic ataxia, Charlevoix-Saguenay ty  |
| PGPC-0006 | Breast-ovarian cancer, familial, suscep |
| PGPC-0006 | Bile acid malabsorption, primary        |
| PGPC-0006 | Hyperphenylalaninemia, BH4-deficien     |
| PGPC-0006 | Glaucoma 3, primary congenital, D; M    |
| PGPC-0006 | Albinism, oculocutaneous, type II; Alb  |
| PGPC-0006 | Progressive external ophthalmoplegia    |
| PGPC-0006 | Surfactant metabolism dysfunction, p    |
| PGPC-0006 | Familial Mediterranean fever            |
| PGPC-0006 | Familial juvenile hyperuricemic nephro  |
| PGPC-0006 | Leber congenital amaurosis 4; Retiniti  |
| PGPC-0006 | Ichthyosiform erythroderma, congenit    |
| PGPC-0006 | Frontotemporal lobar degeneration w     |
| PGPC-0006 | Hemophagocytic lymphohistiocytosis,     |
| PGPC-0006 | Liopdystrophy, partial, acquired; Epile |
| PGPC-0006 | Hypercholesterolemia, familial          |
| PGPC-0006 | Anemia, dyserythropoietic congenital,   |
| PGPC-0006 | Homocystinuria due to cystathionine l   |
| PGPC-0006 | Klippel-Feil syndrome 4, autosomal re   |
| PGPC-0006 | Immunodysregulation, polyendocrino      |
| PGPC-0050 | Microcephaly, primary autosomal rec     |
| PGPC-0050 | Congenital disorder of glycosylation, t |
| PGPC-0050 | Ventricular tachycardia, catecholamin   |
| PGPC-0050 | Miyoshi muscular dystrophy 1; Muscu     |
| PGPC-0050 | Paroxysmal extreme pain disorder        |
| PGPC-0050 | Hyperoxaluria, primary, type 1          |
| PGPC-0050 | Schizophrenia                           |
| PGPC-0050 | Infantile liver failure syndrome 1      |
| PGPC-0050 | Hemochromatosis                         |
| PGPC-0050 | Polycystic kidney disease, autosomal r  |
| PGPC-0050 | Parkinson disease 2, autosomal recess   |
| PGPC-0050 | Platelet glycoprotein IV deficiency     |
| PGPC-0050 | Pendred syndrome; Deafness, autoso      |
| PGPC-0050 | Cortical dysplasia-focal epilepsy syndr |
| PGPC-0050 | Exostoses, multiple, type 1             |
| PGPC-0050 | Candidiasis, familial, 2                |
| PGPC-0050 | Refsum disease                          |
| PGPC-0050 | Refsum disease                          |
| PGPC-0050 | Multiple endocrine neoplasia type I; H  |
| PGPC-0050 | Tyrosinemia, type III; Hawksinuria      |

|           |                                                             |
|-----------|-------------------------------------------------------------|
| PGPC-0050 | Cardiomyopathy, dilated 1U                                  |
| PGPC-0050 | ACTH-independent macronodular adrenocortical dysplasia      |
| PGPC-0050 | ACTH-independent macronodular adrenocortical dysplasia      |
| PGPC-0050 | Increased analgesia from kappa-opioid receptor              |
| PGPC-0050 | Deafness, autosomal recessive 3                             |
| PGPC-0050 | Hemophagocytic lymphohistiocytosis, familial                |
| PGPC-0050 | Methylmalonic aciduria due to transcobalamin II deficiency  |
| PGPC-0050 | Hypercholesterolemia, familial                              |
| PGPC-0050 | Palmoplantar keratoderma and woolly hair                    |
| PGPC-0050 | Cerebral arteriopathy with subcortical white matter changes |
| PGPC-0050 | Muscular dystrophy-dystroglycanopathy                       |

| <b>Gene ID (transcript)</b> | <b>Genomic position</b>          |
|-----------------------------|----------------------------------|
| CASQ1:NM_001231             | chr1:160160801T>C                |
| NCF2:NM_000433              | chr1:183532364T>A                |
| USH2A:NM_206933             | chr1:216496932C>G                |
| APOB:NM_000384              | chr2:21231278G>A                 |
| BMPR2:NM_001204             | chr2:203420712G>A                |
| FASTKD2:NM_014929           | chr2:207631566A>G                |
| DES:NM_001927               | chr2:220284876C>T                |
| CC2D2A:NM_001080522         | chr4:15589552delG                |
| KIT:NM_000222               | chr4:55524252G>A                 |
| SPRY4:NM_001293289          | chr5:141694021G>T                |
| NR3C1:NM_001024094          | chr5:142780337delCTCinsTTT       |
| PKHD1:NM_170724             | chr6:51637536G>T                 |
| DST:NM_001723               | chr6:56485496C>G                 |
| SLC26A4:NM_000441           | chr7:107355874C>T                |
| CNGB3:NM_019098             | chr8:87645092C>T                 |
| VPS13B:NM_017890            | chr8:100887731delCCAGCTGTTCTinsC |
| CDH23:NM_022124             | chr10:73377112G>A                |
| FANCF:NM_022725             | chr11:22646532C>T                |
| EDNRB:NM_001122659          | chr13:78477665G>A                |
| CLN6:NM_017882              | chr15:68504005G>A                |
| HEXA:NM_000520              | chr15:72638921insGATA            |
| ABCA3:NM_001089             | chr16:2367764T>A                 |
| SRCAP:NM_006662             | chr16:30740333A>G                |
| B9D1:NM_001243475           | chr17:19241062C>G                |
| MPO:NM_000250               | chr17:56355397G>A                |
| TYK2:NM_003331              | chr19:10463118G>C                |
| GYS1:NM_002103              | chr19:49472545T>A                |
| CHEK2:NM_145862             | chr22:29121087A>G                |
| ABCB7:NM_001271696          | chrX:74334588C>T                 |
| GBA:NM_001171811            | chr1:155205634T>C                |
| APOB:NM_000384              | chr2:21224853C>T                 |
| APOB:NM_000384              | chr2:21231278G>A                 |
| SLC3A1:NM_000341            | chr2:44513202T>C                 |
| IFIH1:NM_022168             | chr2:163124637T>C                |
| BMPR2:NM_001204             | chr2:203420712G>A                |
| OPA1:NM_130837              | chr3:193336676C>T                |
| PKD2:NM_000297              | chr4:88989089A>C                 |
| TERT:NM_198253              | chr5:1293767G>A                  |
| ADGRV1:NM_032119            | chr5:89979568G>A                 |
| DSP:NM_001008844            | chr6:7565727A>T                  |
| DTNBP1:NM_183040            | chr6:15524715G>A                 |
| NHLRC1:NM_198586            | chr6:18122402C>T                 |
| TNXB:NM_019105              | chr6:32052313C>T                 |

|                    |                                 |
|--------------------|---------------------------------|
| EFHC1:NM_018100    | chr6:52317597T>C                |
| RNASET2:NM_003730  | chr6:167343204C>T               |
| SBDS:NM_016038     | chr7:66453476A>G                |
| SLC26A4:NM_000441  | chr7:107341628T>C               |
| WDR34:NM_052844    | chr9:131418941G>A               |
| HOGA1:NM_138413    | chr10:99371369delGAG            |
| DRD2:NM_016574     | chr11:113283488G>A              |
| CEP290:NM_025114   | chr12:88523494C>G               |
| NPC2:NM_006432     | chr14:74953134C>T               |
| SPG11:NM_001160227 | chr15:44918690C>T               |
| POLG:NM_002693     | chr15:89861826T>C               |
| TSC2:NM_001318829  | chr16:2110795G>A                |
| UMOD:NM_003361     | chr16:20352618C>A               |
| ACD:NM_022914      | chr16:67694606A>G               |
| CHST6:NM_021615    | chr16:75512734C>A               |
| ALOX12B:NM_001139  | chr17:7984479G>A                |
| TCAP:NM_003673     | chr17:37822316G>A               |
| BRCA1:NM_007294    | chr17:41222975C>T               |
| SCN4A:NM_000334    | chr17:62028920C>G               |
| UNC13D:NM_199242   | chr17:73839326C>T               |
| TGFB1:NM_000660    | chr19:41847860G>A               |
| VAPB:NM_004738     | chr20:57014075T>G               |
| COL9A3:NM_001853   | chr20:61472082T>C               |
| CHEK2:NM_145862    | chr22:29130450delTCCTCAGGTTCTTG |
| SLC5A1:NM_000343   | chr22:32439303C>T               |
| ACAD9:NM_014049    | chr3:128622922G>A               |
| NPHP4:NM_001291594 | chr1:5940243G>A                 |
| TARDBP:NM_007375   | chr1:11073982T>C                |
| CLCN6:NM_001256959 | chr1:11866183C>T                |
| ABCA4:NM_000350    | chr1:94467548C>G                |
| ADCK3:NM_020247    | chr1:227174240delCAC            |
| COL3A1:NM_000090   | chr2:189863424C>A               |
| ABCA12:NM_015657   | chr2:215876355G>A               |
| CFI:NM_001318057   | chr4:110667485T>C               |
| GHR:NM_001242400   | chr5:42711376G>A                |
| NR3C1:NM_001024094 | chr5:142780337delCTCinsTTT      |
| RNASET2:NM_003730  | chr6:167343204C>T               |
| NME8:NM_016616     | chr7:37924000G>T                |
| EXT1:NM_000127     | chr8:119124443C>G               |
| PHYH:NM_001037537  | chr10:13325784C>T               |
| SMPD1:NM_001007593 | chr11:6412635G>A                |
| RAG1:NM_000448     | chr11:36596200G>A               |
| CAPN5:NM_004055    | chr11:76826581delC              |
| MYO7A:NM_000260    | chr11:76903189G>A               |

|                     |                                 |
|---------------------|---------------------------------|
| HMBS:NM_001258209   | chr11:118959973A>T              |
| CACNA2D4:NM_172364  | chr12:1969369G>A                |
| ADCY6:NM_015270     | chr12:49168798C>A               |
| GJB2:NM_004004      | chr13:20763554delA              |
| SACS:NM_014363      | chr13:23929378G>A               |
| BRCA2:NM_000059     | chr13:32910456C>G               |
| SLC10A2:NM_000452   | chr13:103701690G>A              |
| GCH1:NM_001024024   | chr14:55369314G>A               |
| LTBP2:NM_000428     | chr14:74988734C>T               |
| OCA2:NM_000275      | chr15:28228553C>T               |
| POLG:NM_001126131   | chr15:89861826T>C               |
| ABCA3:NM_001089     | chr16:2350115G>T                |
| MEFV:NM_000243      | chr16:3293310A>G                |
| UMOD:NM_001008389   | chr16:20352618C>A               |
| AIPL1:NM_001285401  | chr17:6331817C>T                |
| ALOX12B:NM_001139   | chr17:7984479G>A                |
| GRN:NM_002087       | chr17:42427605C>A               |
| UNC13D:NM_199242    | chr17:73839326C>T               |
| LMNB2:NM_032737     | chr19:2435150C>T                |
| LDLR:NM_001195799   | chr19:11240278G>A               |
| KLF1:NM_006563      | chr19:12998102C>T               |
| CBS:NM_000071       | chr21:44480591G>A               |
| MYO18B:NM_032608    | chr22:26166953delTGAGTCCCCTGTCC |
| FOXP3:NM_001114377  | chrX:49113312G>A                |
| STIL:NM_001282938   | chr1:47746675C>G                |
| ALG6:NM_013339      | chr1:63872032T>C                |
| RYR2:NM_001035      | chr1:237870323G>A               |
| DYSF:NM_001130979   | chr2:71762413G>A                |
| SCN9A:NM_002977     | chr2:167141109G>T               |
| AGXT:NM_000030      | chr2:241815411T>C               |
| ALS2CL:NM_001190707 | chr3:46729697C>A                |
| LARS:NM_020117      | chr5:145551522T>C               |
| HFE:NM_001300749    | chr6:26091185A>T                |
| PKHD1:NM_170724     | chr6:51609303A>G                |
| PARK2:NM_013987     | chr6:162864388C>G               |
| CD36:NM_001127444   | chr7:80300431insA               |
| SLC26A4:NM_000441   | chr7:107330653G>A               |
| CNTNAP2:NM_014141   | chr7:145813093A>G               |
| EXT1:NM_000127      | chr8:119124443C>G               |
| CARD9:NM_052813     | chr9:139258789delT              |
| PHYH:NM_001323083   | chr10:13320339G>A               |
| PHYH:NM_001323083   | chr10:13325784C>T               |
| MEN1:NM_130801      | chr11:64575505C>T               |
| HPD:NM_002150       | chr12:122277904G>C              |

|                     |                     |
|---------------------|---------------------|
| PSEN1:NM_000021     | chr14:73602899C>G   |
| ARMC5:NM_001105247  | chr16:31475712C>A   |
| ARMC5:NM_001105247  | chr16:31477594C>G   |
| MC1R:NM_002386      | chr16:89986091G>A   |
| MYO15A:NM_016239    | chr17:18023066delC  |
| STXBP2:NM_001127396 | chr19:7710134C>T    |
| CD320:NM_016579     | chr19:8369919delCTC |
| LDLR:NM_000527      | chr19:11231203G>A   |
| KANK2:NM_001329451  | chr19:11277236A>G   |
| NOTCH3:NM_000435    | chr19:15285063G>T   |
| FKRP:NM_001039885   | chr19:47259048C>G   |









|     |     |
|-----|-----|
| Yes | Yes |
| Yes | No  |
| Yes | Yes |







|     |     |
|-----|-----|
| Yes | Yes |









|     |     |
|-----|-----|
| Yes | Yes |
| Yes | No  |
| Yes | Yes |
| No  | No  |
| Yes | Yes |

**Notes**

Two SNVs

Two SNVs
