# Supplementary material for: Impact of DNA source on genetic variant detection from human whole-genome sequencing data
Source: PubMed Central journal article supplement — J Med Genet. 2019 Sep 12;56(12):809–17. doi: 10.1136/jmedgenet-2019-106281 (PMC6929712; doi:10.1136/jmedgenet-2019-106281), 2019-09-12
Supplement: jmedgenet-2019-106281supp006.pdf [file jmedgenet-2019-106281supp006.pdf]

| Chr | Start | End       | Variant type  | Individual |
|-----|-------|-----------|---------------|------------|
|     | 6     | 126183065 | 126187452 DEL | PGPC-0002  |
|     | 6     | 31421503  | 31424386 DEL  | PGPC-0002  |
|     | 19    | 27961384  | 27963280 DEL  | PGPC-0002  |
|     | 7     | 57957732  | 57959347 DEL  | PGPC-0002  |
|     | 1     | 213084232 | 213086265 DEL | PGPC-0002  |
|     | 8     | 97520708  | 97521915 DEL  | PGPC-0002  |
|     | 6     | 85318159  | 85324220 DEL  | PGPC-0002  |
|     | 5     | 50234384  | 50239563 DEL  | PGPC-0002  |
|     | 20    | 26297514  | 26302711 DEL  | PGPC-0002  |
|     | 13    | 66715567  | 66720751 DEL  | PGPC-0002  |
|     | 7     | 91214258  | 91220735 DEL  | PGPC-0002  |
|     | 6     | 53928710  | 53934828 DEL  | PGPC-0002  |
| X   |       | 154790190 | 154803560 DEL | PGPC-0002  |
|     | 4     | 151875683 | 151885876 DEL | PGPC-0002  |
|     | 4     | 93567001  | 93569000 DUP  | PGPC-0002  |
|     | 17    | 54870001  | 54871000 DUP  | PGPC-0002  |
|     | 14    | 90911001  | 90912000 DUP  | PGPC-0002  |
|     | 1     | 81856001  | 81857000 DUP  | PGPC-0002  |
|     | 16    | 33887001  | 33888000 DUP  | PGPC-0002  |
|     | 4     | 190613001 | 190616000 DUP | PGPC-0002  |
|     | 1     | 234912001 | 234920000 DUP | PGPC-0002  |
|     | 1     | 121478001 | 121485000 DUP | PGPC-0002  |
|     | 16    | 33865001  | 33870000 DUP  | PGPC-0002  |
|     | 6     | 58775001  | 58780000 DUP  | PGPC-0002  |
|     | 10    | 38869001  | 38888000 DUP  | PGPC-0002  |
|     | 11    | 114475001 | 114493000 DUP | PGPC-0002  |
|     | 22    | 16848001  | 16863000 DUP  | PGPC-0002  |
| Y   |       | 22420001  | 22444000 DUP  | PGPC-0002  |
| Y   |       | 28784001  | 28819000 DUP  | PGPC-0002  |
|     | 11    | 51582001  | 51593000 DUP  | PGPC-0002  |
|     | 5     | 21450215  | 21452426 DEL  | PGPC-0002  |
|     | 6     | 142110604 | 142114941 DEL | PGPC-0002  |
|     | 1     | 187464829 | 187466475 DEL | PGPC-0002  |
|     | 13    | 39934200  | 39935480 DEL  | PGPC-0002  |
|     | 12    | 72356640  | 72358172 DEL  | PGPC-0002  |
|     | 11    | 24443154  | 24452287 DEL  | PGPC-0002  |
|     | 6     | 31279008  | 31288711 DEL  | PGPC-0002  |
|     | 12    | 70872267  | 70878217 DEL  | PGPC-0002  |
|     | 6     | 19041220  | 19049384 DEL  | PGPC-0002  |
|     | 2     | 227165427 | 227171169 DEL | PGPC-0002  |
|     | 18    | 38259894  | 38266749 DEL  | PGPC-0002  |
|     | 10    | 53203407  | 53214222 DEL  | PGPC-0002  |
| X   |       | 58513717  | 58531820 DEL  | PGPC-0002  |
|     | 20    | 1561068   | 1594299 DEL   | PGPC-0002  |
|     | 22    | 45723001  | 45725000 DUP  | PGPC-0002  |

|   |    |           |               |           |
|---|----|-----------|---------------|-----------|
|   | 20 | 62324001  | 62326000 DUP  | PGPC-0002 |
|   | 17 | 22020001  | 22021000 DUP  | PGPC-0002 |
|   | 1  | 234911001 | 234919000 DUP | PGPC-0002 |
|   | 6  | 32516001  | 32522000 DUP  | PGPC-0002 |
|   | 17 | 21246001  | 21253000 DUP  | PGPC-0002 |
|   | 11 | 189001    | 196000 DUP    | PGPC-0002 |
|   | 20 | 29804001  | 29834000 DUP  | PGPC-0002 |
|   | 8  | 58114001  | 58127000 DUP  | PGPC-0002 |
|   | 12 | 146001    | 170000 DUP    | PGPC-0002 |
|   | 9  | 66821001  | 66863000 DUP  | PGPC-0002 |
|   | 11 | 18940001  | 18964000 DUP  | PGPC-0002 |
|   | 14 | 107151001 | 107174000 DUP | PGPC-0002 |
|   | 1  | 199564020 | 199566641 DEL | PGPC-0002 |
|   | 12 | 90487070  | 90491694 DEL  | PGPC-0002 |
|   | 15 | 35531018  | 35535922 DEL  | PGPC-0002 |
|   | 1  | 94288376  | 94291256 DEL  | PGPC-0002 |
|   | 21 | 16588381  | 16591452 DEL  | PGPC-0002 |
|   | 6  | 151485888 | 151486912 DEL | PGPC-0002 |
|   | 9  | 136170930 | 136176710 DEL | PGPC-0002 |
|   | 5  | 50234384  | 50239464 DEL  | PGPC-0002 |
|   | 3  | 162717307 | 162723683 DEL | PGPC-0002 |
|   | 1  | 248051493 | 248057638 DEL | PGPC-0002 |
|   | 5  | 26796702  | 26801896 DEL  | PGPC-0002 |
|   | 1  | 175071079 | 175077227 DEL | PGPC-0002 |
|   | 1  | 169223801 | 169246134 DEL | PGPC-0002 |
|   | 17 | 21219001  | 21221000 DUP  | PGPC-0002 |
|   | 3  | 111274001 | 111275000 DUP | PGPC-0002 |
|   | 5  | 17713001  | 17716000 DUP  | PGPC-0002 |
|   | 4  | 3573001   | 3576000 DUP   | PGPC-0002 |
|   | 3  | 77404001  | 77405000 DUP  | PGPC-0002 |
|   | 9  | 134618001 | 134622000 DUP | PGPC-0002 |
|   | 4  | 190656001 | 190663000 DUP | PGPC-0002 |
|   | 4  | 190680001 | 190685000 DUP | PGPC-0002 |
|   | 8  | 43820001  | 43838000 DUP  | PGPC-0002 |
|   | 4  | 3572001   | 3596000 DUP   | PGPC-0002 |
| Y |    | 13686001  | 13748000 DUP  | PGPC-0002 |
|   | 4  | 190656001 | 190685000 DUP | PGPC-0002 |
|   | 17 | 21303001  | 21321000 DUP  | PGPC-0002 |
|   | 3  | 195408001 | 195449000 DUP | PGPC-0002 |
|   | 12 | 60412350  | 60413508 DEL  | PGPC-0002 |
|   | 4  | 115928724 | 115931873 DEL | PGPC-0002 |
|   | 3  | 105075669 | 105077991 DEL | PGPC-0002 |
|   | 7  | 89810410  | 89812599 DEL  | PGPC-0002 |
| X |    | 78921890  | 78926076 DEL  | PGPC-0002 |
|   | 5  | 60001710  | 60003665 DEL  | PGPC-0002 |
|   | 3  | 131708254 | 131713384 DEL | PGPC-0002 |

|   |    |           |               |           |
|---|----|-----------|---------------|-----------|
|   | 5  | 46270647  | 46275836 DEL  | PGPC-0002 |
|   | 10 | 54783543  | 54788829 DEL  | PGPC-0002 |
|   | 13 | 48286711  | 48292386 DEL  | PGPC-0002 |
|   | 11 | 54956885  | 54972881 DEL  | PGPC-0002 |
|   | 6  | 31279008  | 31294231 DEL  | PGPC-0002 |
|   | 6  | 32458243  | 32471904 DEL  | PGPC-0002 |
| X |    | 154790190 | 154803515 DEL | PGPC-0002 |
|   | 1  | 152760366 | 152770857 DEL | PGPC-0002 |
|   | 21 | 33157001  | 33158000 DUP  | PGPC-0002 |
|   | 1  | 236877001 | 236879000 DUP | PGPC-0002 |
|   | 19 | 27869001  | 27871000 DUP  | PGPC-0002 |
|   | 11 | 1691001   | 1692000 DUP   | PGPC-0002 |
|   | 4  | 3593001   | 3596000 DUP   | PGPC-0002 |
|   | 4  | 3573001   | 3577000 DUP   | PGPC-0002 |
|   | 16 | 35247001  | 35252000 DUP  | PGPC-0002 |
|   | 11 | 42968001  | 42975000 DUP  | PGPC-0002 |
|   | 6  | 157731001 | 157736000 DUP | PGPC-0002 |
|   | 9  | 68989001  | 69004000 DUP  | PGPC-0002 |
|   | 10 | 42534001  | 42546000 DUP  | PGPC-0002 |
|   | 16 | 33865001  | 33902000 DUP  | PGPC-0002 |
|   | 8  | 43793001  | 43838000 DUP  | PGPC-0002 |
|   | 2  | 92290001  | 92326000 DUP  | PGPC-0002 |
|   | 3  | 84699538  | 84702784 DEL  | PGPC-0005 |
|   | 3  | 196934574 | 196939255 DEL | PGPC-0005 |
|   | 12 | 84593115  | 84596042 DEL  | PGPC-0005 |
|   | 5  | 98345122  | 98347482 DEL  | PGPC-0005 |
|   | 12 | 31952182  | 31954473 DEL  | PGPC-0005 |
|   | 3  | 177294511 | 177297473 DEL | PGPC-0005 |
|   | 5  | 117387100 | 117393883 DEL | PGPC-0005 |
|   | 14 | 85297117  | 85302155 DEL  | PGPC-0005 |
|   | 5  | 12811020  | 12820523 DEL  | PGPC-0005 |
|   | 2  | 209942875 | 209949000 DEL | PGPC-0005 |
|   | 6  | 85318159  | 85324220 DEL  | PGPC-0005 |
|   | 13 | 23632280  | 23637302 DEL  | PGPC-0005 |
|   | 12 | 33385165  | 33398242 DEL  | PGPC-0005 |
|   | 3  | 162127598 | 162143267 DEL | PGPC-0005 |
|   | 1  | 169224545 | 169246568 DEL | PGPC-0005 |
|   | 14 | 106530770 | 106569394 DEL | PGPC-0005 |
|   | 1  | 81855001  | 81857000 DUP  | PGPC-0005 |
|   | 20 | 62324001  | 62325000 DUP  | PGPC-0005 |
|   | 12 | 124496001 | 124500000 DUP | PGPC-0005 |
|   | 11 | 1213001   | 1214000 DUP   | PGPC-0005 |
|   | 16 | 33887001  | 33888000 DUP  | PGPC-0005 |
|   | 2  | 3698001   | 3699000 DUP   | PGPC-0005 |
|   | 1  | 234912001 | 234920000 DUP | PGPC-0005 |
|   | 4  | 90102001  | 90107000 DUP  | PGPC-0005 |

|   |    |           |               |           |
|---|----|-----------|---------------|-----------|
|   | 7  | 57990001  | 57997000 DUP  | PGPC-0005 |
|   | 16 | 33865001  | 33870000 DUP  | PGPC-0005 |
|   | 17 | 21246001  | 21253000 DUP  | PGPC-0005 |
|   | 22 | 16848001  | 16863000 DUP  | PGPC-0005 |
|   | 16 | 33865001  | 33902000 DUP  | PGPC-0005 |
|   | 20 | 29804001  | 29830000 DUP  | PGPC-0005 |
|   | 7  | 61858001  | 61917000 DUP  | PGPC-0005 |
|   | 7  | 100606001 | 100616000 DUP | PGPC-0005 |
|   | 17 | 34437001  | 34510000 DUP  | PGPC-0005 |
|   | 6  | 32615791  | 32620148 DEL  | PGPC-0005 |
| X |    | 131005308 | 131008630 DEL | PGPC-0005 |
|   | 16 | 1423011   | 1424186 DEL   | PGPC-0005 |
|   | 13 | 23632349  | 23637302 DEL  | PGPC-0005 |
| X |    | 5055348   | 5057499 DEL   | PGPC-0005 |
|   | 1  | 101695346 | 101697780 DEL | PGPC-0005 |
|   | 6  | 32638080  | 32648041 DEL  | PGPC-0005 |
|   | 5  | 83947954  | 83955485 DEL  | PGPC-0005 |
|   | 18 | 38259894  | 38266749 DEL  | PGPC-0005 |
|   | 1  | 62113415  | 62119520 DEL  | PGPC-0005 |
|   | 3  | 131708254 | 131713384 DEL | PGPC-0005 |
|   | 19 | 27910801  | 28118000 DEL  | PGPC-0005 |
| X |    | 154790190 | 154803568 DEL | PGPC-0005 |
|   | 8  | 47372001  | 47464000 DEL  | PGPC-0005 |
|   | 16 | 78371639  | 78384967 DEL  | PGPC-0005 |
|   | 6  | 78967188  | 79036475 DEL  | PGPC-0005 |
|   | 1  | 112691793 | 112704703 DEL | PGPC-0005 |
|   | 11 | 93971001  | 93972000 DUP  | PGPC-0005 |
| Y |    | 14436001  | 14440000 DUP  | PGPC-0005 |
| Y |    | 13842001  | 13845000 DUP  | PGPC-0005 |
|   | 1  | 91852001  | 91853000 DUP  | PGPC-0005 |
|   | 4  | 190656001 | 190663000 DUP | PGPC-0005 |
|   | 4  | 190680001 | 190685000 DUP | PGPC-0005 |
|   | 4  | 90102001  | 90108000 DUP  | PGPC-0005 |
|   | 16 | 33864001  | 33902000 DUP  | PGPC-0005 |
|   | 10 | 38773001  | 38818000 DUP  | PGPC-0005 |
| Y |    | 13686001  | 13870000 DUP  | PGPC-0005 |
|   | 8  | 43820001  | 43838000 DUP  | PGPC-0005 |
|   | 17 | 21303001  | 21321000 DUP  | PGPC-0005 |
|   | 8  | 47525001  | 47545000 DUP  | PGPC-0005 |
|   | 2  | 33765263  | 33767876 DEL  | PGPC-0005 |
|   | 20 | 15711534  | 15712700 DEL  | PGPC-0005 |
|   | 18 | 63766874  | 63769202 DEL  | PGPC-0005 |
|   | 3  | 32806798  | 32808227 DEL  | PGPC-0005 |
|   | 2  | 56652303  | 56655882 DEL  | PGPC-0005 |
|   | 13 | 72477266  | 72480576 DEL  | PGPC-0005 |
|   | 14 | 80106291  | 80115049 DEL  | PGPC-0005 |

|   |    |           |               |           |
|---|----|-----------|---------------|-----------|
|   | 2  | 208351155 | 208359369 DEL | PGPC-0005 |
|   | 7  | 93327143  | 93332281 DEL  | PGPC-0005 |
|   | 5  | 50234384  | 50239464 DEL  | PGPC-0005 |
|   | 6  | 32460898  | 32471602 DEL  | PGPC-0005 |
|   | 1  | 169223622 | 169246165 DEL | PGPC-0005 |
|   | 3  | 162127846 | 162143267 DEL | PGPC-0005 |
|   | 1  | 248738201 | 248798200 DEL | PGPC-0005 |
|   | 10 | 20849500  | 20861164 DEL  | PGPC-0005 |
|   | 3  | 197826001 | 197830000 DUP | PGPC-0005 |
| Y |    | 13842001  | 13844000 DUP  | PGPC-0005 |
|   | 1  | 81856001  | 81857000 DUP  | PGPC-0005 |
|   | 11 | 107461001 | 107462000 DUP | PGPC-0005 |
|   | 14 | 90911001  | 90912000 DUP  | PGPC-0005 |
|   | 8  | 144940001 | 144941000 DUP | PGPC-0005 |
|   | 16 | 35247001  | 35252000 DUP  | PGPC-0005 |
|   | 6  | 32440001  | 32458000 DUP  | PGPC-0005 |
|   | 21 | 19326527  | 19329209 DEL  | PGPC-0005 |
|   | 9  | 131411796 | 131413920 DEL | PGPC-0005 |
|   | 4  | 142230784 | 142233062 DEL | PGPC-0005 |
|   | 14 | 61058061  | 61059489 DEL  | PGPC-0005 |
|   | 15 | 77330600  | 77332721 DEL  | PGPC-0005 |
|   | 1  | 112835106 | 112837665 DEL | PGPC-0005 |
|   | 11 | 42812253  | 42818436 DEL  | PGPC-0005 |
|   | 5  | 83948053  | 83955205 DEL  | PGPC-0005 |
|   | 2  | 41775967  | 41781283 DEL  | PGPC-0005 |
|   | 1  | 218182503 | 218188594 DEL | PGPC-0005 |
|   | 8  | 144700488 | 144714692 DEL | PGPC-0005 |
|   | 4  | 161043735 | 161074854 DEL | PGPC-0005 |
|   | 10 | 20849614  | 20860959 DEL  | PGPC-0005 |
|   | 4  | 1421001   | 1423000 DUP   | PGPC-0005 |
|   | 10 | 38815001  | 38818000 DUP  | PGPC-0005 |
|   | 1  | 2371001   | 2372000 DUP   | PGPC-0005 |
|   | 17 | 34437001  | 34504000 DUP  | PGPC-0005 |
|   | 6  | 157699921 | 157703236 DEL | PGPC-0006 |
|   | 6  | 170484021 | 170486604 DEL | PGPC-0006 |
|   | 5  | 90499776  | 90502095 DEL  | PGPC-0006 |
|   | 13 | 101894147 | 101896699 DEL | PGPC-0006 |
|   | 4  | 152790166 | 152794721 DEL | PGPC-0006 |
|   | 4  | 183753060 | 183755742 DEL | PGPC-0006 |
|   | 14 | 70016997  | 70022486 DEL  | PGPC-0006 |
|   | 4  | 172645668 | 172651797 DEL | PGPC-0006 |
|   | 3  | 162717307 | 162723896 DEL | PGPC-0006 |
|   | 2  | 147941348 | 147946806 DEL | PGPC-0006 |
|   | 14 | 40609816  | 40617672 DEL  | PGPC-0006 |
|   | 7  | 93327143  | 93332281 DEL  | PGPC-0006 |
|   | 4  | 64694329  | 64714390 DEL  | PGPC-0006 |

|    |           |               |           |
|----|-----------|---------------|-----------|
| 6  | 32454687  | 32487609 DEL  | PGPC-0006 |
| 4  | 151875584 | 151885588 DEL | PGPC-0006 |
| 2  | 87633667  | 87655605 DEL  | PGPC-0006 |
| 8  | 144940001 | 144941000 DUP | PGPC-0006 |
| 16 | 33887001  | 33888000 DUP  | PGPC-0006 |
| 4  | 548001    | 550000 DUP    | PGPC-0006 |
| 10 | 38815001  | 38818000 DUP  | PGPC-0006 |
| 7  | 100606001 | 100611000 DUP | PGPC-0006 |
| 4  | 190680001 | 190685000 DUP | PGPC-0006 |
| 4  | 190656001 | 190663000 DUP | PGPC-0006 |
| 17 | 21246001  | 21253000 DUP  | PGPC-0006 |
| 1  | 206283001 | 206289000 DUP | PGPC-0006 |
| 10 | 38869001  | 38890000 DUP  | PGPC-0006 |
| 16 | 33864001  | 33902000 DUP  | PGPC-0006 |
| 22 | 16848001  | 16866000 DUP  | PGPC-0006 |
| 7  | 61858001  | 61917000 DUP  | PGPC-0006 |
| 17 | 21303001  | 21321000 DUP  | PGPC-0006 |
| 11 | 50338001  | 50356000 DUP  | PGPC-0006 |
| 6  | 161277030 | 161279838 DEL | PGPC-0006 |
| 7  | 22434804  | 22436760 DEL  | PGPC-0006 |
| 10 | 3102947   | 3105042 DEL   | PGPC-0006 |
| 17 | 41516991  | 41518243 DEL  | PGPC-0006 |
| 9  | 101309049 | 101311664 DEL | PGPC-0006 |
| 16 | 48509138  | 48511486 DEL  | PGPC-0006 |
| 3  | 146385193 | 146394861 DEL | PGPC-0006 |
| 12 | 86695695  | 86703066 DEL  | PGPC-0006 |
| 11 | 104267752 | 104273229 DEL | PGPC-0006 |
| 11 | 5784572   | 5809282 DEL   | PGPC-0006 |
| 7  | 133785004 | 133798329 DEL | PGPC-0006 |
| 6  | 78967188  | 79036475 DEL  | PGPC-0006 |
| 11 | 93971001  | 93973000 DUP  | PGPC-0006 |
| 11 | 51572001  | 51575000 DUP  | PGPC-0006 |
| 17 | 21194001  | 21196000 DUP  | PGPC-0006 |
| 2  | 3697001   | 3699000 DUP   | PGPC-0006 |
| 6  | 32450001  | 32455000 DUP  | PGPC-0006 |
| 11 | 93967001  | 93973000 DUP  | PGPC-0006 |
| 16 | 35246001  | 35252000 DUP  | PGPC-0006 |
| 22 | 16848001  | 16863000 DUP  | PGPC-0006 |
| 17 | 21303001  | 21331000 DUP  | PGPC-0006 |
| 7  | 61904001  | 61917000 DUP  | PGPC-0006 |
| 3  | 195408001 | 195450000 DUP | PGPC-0006 |
| 6  | 57268001  | 57297000 DUP  | PGPC-0006 |
| 11 | 51582001  | 51593000 DUP  | PGPC-0006 |
| 19 | 12556452  | 12557985 DEL  | PGPC-0006 |
| 12 | 111976289 | 111979900 DEL | PGPC-0006 |
| 3  | 184470920 | 184472477 DEL | PGPC-0006 |

|   |    |           |               |           |
|---|----|-----------|---------------|-----------|
|   | 6  | 95289248  | 95291789 DEL  | PGPC-0006 |
|   | 5  | 86115138  | 86117858 DEL  | PGPC-0006 |
|   | 4  | 61330107  | 61333186 DEL  | PGPC-0006 |
|   | 6  | 85318159  | 85324220 DEL  | PGPC-0006 |
|   | 3  | 162717307 | 162723884 DEL | PGPC-0006 |
|   | 5  | 46270647  | 46275836 DEL  | PGPC-0006 |
|   | 11 | 4968160   | 4976894 DEL   | PGPC-0006 |
|   | 9  | 15815310  | 15821940 DEL  | PGPC-0006 |
|   | 18 | 26273064  | 26278412 DEL  | PGPC-0006 |
| X |    | 154790190 | 154803516 DEL | PGPC-0006 |
|   | 4  | 64694329  | 64714379 DEL  | PGPC-0006 |
|   | 4  | 190155001 | 190157000 DUP | PGPC-0006 |
|   | 4  | 1420001   | 1423000 DUP   | PGPC-0006 |
|   | 19 | 21753001  | 21757000 DUP  | PGPC-0006 |
|   | 1  | 81856001  | 81857000 DUP  | PGPC-0006 |
|   | 7  | 61968001  | 61971000 DUP  | PGPC-0006 |
|   | 12 | 93845001  | 93846000 DUP  | PGPC-0006 |
|   | 5  | 167118001 | 167123000 DUP | PGPC-0006 |
|   | 11 | 42968001  | 42976000 DUP  | PGPC-0006 |
|   | 7  | 61098001  | 61103000 DUP  | PGPC-0006 |
|   | 11 | 189001    | 196000 DUP    | PGPC-0006 |
|   | 10 | 46947001  | 47151000 DUP  | PGPC-0006 |
|   | 7  | 100606001 | 100616000 DUP | PGPC-0006 |
|   | 12 | 146001    | 170000 DUP    | PGPC-0006 |
|   | 8  | 25066686  | 25070652 DEL  | PGPC-0006 |
|   | 8  | 66092145  | 66094893 DEL  | PGPC-0006 |
|   | 13 | 39934200  | 39935480 DEL  | PGPC-0006 |
|   | 11 | 7790218   | 7792099 DEL   | PGPC-0006 |
|   | 4  | 91931558  | 91935836 DEL  | PGPC-0006 |
|   | 3  | 196934574 | 196939255 DEL | PGPC-0006 |
|   | 1  | 248051493 | 248057638 DEL | PGPC-0006 |
|   | 7  | 152574768 | 152580594 DEL | PGPC-0006 |
|   | 11 | 4968058   | 4976859 DEL   | PGPC-0006 |
| X |    | 115137999 | 115152944 DEL | PGPC-0006 |
|   | 6  | 32448587  | 32491975 DEL  | PGPC-0006 |
|   | 1  | 169223850 | 169246098 DEL | PGPC-0006 |
|   | 14 | 90911001  | 90912000 DUP  | PGPC-0006 |
|   | 5  | 21543001  | 21545000 DUP  | PGPC-0006 |
|   | 16 | 896001    | 898000 DUP    | PGPC-0006 |
|   | 8  | 52730001  | 52731000 DUP  | PGPC-0006 |
|   | 12 | 80155001  | 80163000 DUP  | PGPC-0006 |
|   | 6  | 157731001 | 157736000 DUP | PGPC-0006 |
|   | 16 | 33865001  | 33902000 DUP  | PGPC-0006 |
|   | 5  | 90499776  | 90502095 DEL  | PGPC-0050 |
|   | 7  | 104473087 | 104474345 DEL | PGPC-0050 |
|   | 19 | 27961387  | 27963207 DEL  | PGPC-0050 |

|   |    |           |               |           |
|---|----|-----------|---------------|-----------|
|   | 9  | 132026701 | 132028069 DEL | PGPC-0050 |
|   | 9  | 71738123  | 71743354 DEL  | PGPC-0050 |
|   | 3  | 146385193 | 146394861 DEL | PGPC-0050 |
|   | 8  | 594398    | 599414 DEL    | PGPC-0050 |
|   | 11 | 104267752 | 104273229 DEL | PGPC-0050 |
|   | 21 | 25258374  | 25263453 DEL  | PGPC-0050 |
|   | 13 | 51069351  | 51075078 DEL  | PGPC-0050 |
|   | 11 | 5784572   | 5809282 DEL   | PGPC-0050 |
|   | 8  | 5595517   | 5605779 DEL   | PGPC-0050 |
|   | 8  | 32680010  | 32691261 DEL  | PGPC-0050 |
|   | 17 | 21194001  | 21196000 DUP  | PGPC-0050 |
| Y |    | 14436001  | 14440000 DUP  | PGPC-0050 |
|   | 8  | 43792001  | 43795000 DUP  | PGPC-0050 |
|   | 6  | 57239001  | 57244000 DUP  | PGPC-0050 |
|   | 20 | 52479001  | 52485000 DUP  | PGPC-0050 |
|   | 17 | 41379001  | 41384000 DUP  | PGPC-0050 |
|   | 10 | 39076001  | 39155000 DUP  | PGPC-0050 |
| Y |    | 13686001  | 13870000 DUP  | PGPC-0050 |
|   | 10 | 46947001  | 47150000 DUP  | PGPC-0050 |
|   | 19 | 53518001  | 53552000 DUP  | PGPC-0050 |
|   | 14 | 107148001 | 107177000 DUP | PGPC-0050 |
|   | 8  | 2196001   | 2285000 DUP   | PGPC-0050 |
|   | 18 | 38864780  | 38868343 DEL  | PGPC-0050 |
|   | 4  | 174533050 | 174535936 DEL | PGPC-0050 |
|   | 12 | 72356557  | 72358142 DEL  | PGPC-0050 |
|   | 4  | 61330107  | 61333186 DEL  | PGPC-0050 |
|   | 14 | 20376013  | 20379478 DEL  | PGPC-0050 |
|   | 2  | 31725162  | 31727432 DEL  | PGPC-0050 |
|   | 6  | 85318159  | 85324220 DEL  | PGPC-0050 |
|   | 1  | 210078056 | 210085977 DEL | PGPC-0050 |
|   | 5  | 26796702  | 26801896 DEL  | PGPC-0050 |
|   | 2  | 213183965 | 213192011 DEL | PGPC-0050 |
|   | 19 | 27905801  | 28115600 DEL  | PGPC-0050 |
|   | 8  | 43447601  | 43753600 DEL  | PGPC-0050 |
|   | 8  | 47395001  | 47458000 DEL  | PGPC-0050 |
|   | 6  | 77437223  | 77459101 DEL  | PGPC-0050 |
|   | 10 | 20849655  | 20861089 DEL  | PGPC-0050 |
|   | 2  | 66185969  | 66197059 DEL  | PGPC-0050 |
|   | 19 | 27889001  | 27890000 DUP  | PGPC-0050 |
|   | 8  | 144939001 | 144941000 DUP | PGPC-0050 |
|   | 7  | 142046001 | 142048000 DUP | PGPC-0050 |
|   | 6  | 157731001 | 157736000 DUP | PGPC-0050 |
|   | 4  | 3572001   | 3577000 DUP   | PGPC-0050 |
| Y |    | 3713001   | 3721000 DUP   | PGPC-0050 |
|   | 4  | 3572001   | 3597000 DUP   | PGPC-0050 |
|   | 7  | 61904001  | 61917000 DUP  | PGPC-0050 |



|    |           |               |           |
|----|-----------|---------------|-----------|
| 22 | 16848001  | 16863000 DUP  | PGPC-0050 |
| 19 | 54727001  | 54746000 DUP  | PGPC-0050 |
| 6  | 32451001  | 32461000 DUP  | PGPC-0050 |
| 7  | 61863001  | 61917000 DUP  | PGPC-0050 |
| 18 | 74104773  | 74106789 DEL  | PGPC-0050 |
| 6  | 33583199  | 33585844 DEL  | PGPC-0050 |
| 11 | 127749543 | 127751584 DEL | PGPC-0050 |
| 6  | 35626435  | 35629744 DEL  | PGPC-0050 |
| 19 | 14732346  | 14734126 DEL  | PGPC-0050 |
| 6  | 5037250   | 5039186 DEL   | PGPC-0050 |
| 5  | 46270647  | 46275836 DEL  | PGPC-0050 |
| 19 | 54555555  | 54560642 DEL  | PGPC-0050 |
| 2  | 194689503 | 194698765 DEL | PGPC-0050 |
| 10 | 54783543  | 54788829 DEL  | PGPC-0050 |
| 11 | 4968151   | 4976871 DEL   | PGPC-0050 |
| 1  | 169223869 | 169246162 DEL | PGPC-0050 |
| 1  | 248738201 | 248798200 DEL | PGPC-0050 |
| 10 | 20849606  | 20861124 DEL  | PGPC-0050 |
| 10 | 134177001 | 134178000 DUP | PGPC-0050 |
| 5  | 21543001  | 21545000 DUP  | PGPC-0050 |
| 4  | 190683001 | 190685000 DUP | PGPC-0050 |
| 1  | 91852001  | 91854000 DUP  | PGPC-0050 |
| 11 | 1213001   | 1214000 DUP   | PGPC-0050 |
| 5  | 143420001 | 143425000 DUP | PGPC-0050 |
| 17 | 21246001  | 21253000 DUP  | PGPC-0050 |
| 4  | 190656001 | 190663000 DUP | PGPC-0050 |
| 17 | 21303001  | 21344000 DUP  | PGPC-0050 |
| 4  | 49093001  | 49280000 DUP  | PGPC-0050 |
| 10 | 46947001  | 47151000 DUP  | PGPC-0050 |
| 17 | 21219001  | 21253000 DUP  | PGPC-0050 |
| 6  | 32501001  | 32515000 DUP  | PGPC-0050 |
| 22 | 16848001  | 16862000 DUP  | PGPC-0050 |
| 10 | 6251746   | 6252896 DEL   | PGPC-0050 |
| 1  | 94288376  | 94291256 DEL  | PGPC-0050 |
| 4  | 6897297   | 6900381 DEL   | PGPC-0050 |
| 17 | 26780388  | 26783491 DEL  | PGPC-0050 |
| 21 | 19326840  | 19329323 DEL  | PGPC-0050 |
| 11 | 58167000  | 58168149 DEL  | PGPC-0050 |
| 3  | 162717307 | 162723683 DEL | PGPC-0050 |
| 4  | 70467459  | 70472802 DEL  | PGPC-0050 |
| 14 | 40609816  | 40617672 DEL  | PGPC-0050 |
| 4  | 112237250 | 112242412 DEL | PGPC-0050 |
| 7  | 70420970  | 70426184 DEL  | PGPC-0050 |
| 11 | 4968087   | 4976947 DEL   | PGPC-0050 |
| 2  | 180065447 | 180081639 DEL | PGPC-0050 |
| X  | 154790190 | 154803503 DEL | PGPC-0050 |

|   |    |           |               |           |
|---|----|-----------|---------------|-----------|
|   | 10 | 124341053 | 124354106 DEL | PGPC-0050 |
|   | 16 | 33887001  | 33888000 DUP  | PGPC-0050 |
|   | 10 | 38816001  | 38818000 DUP  | PGPC-0050 |
|   | 3  | 111274001 | 111275000 DUP | PGPC-0050 |
|   | 2  | 3698001   | 3699000 DUP   | PGPC-0050 |
|   | 1  | 91852001  | 91853000 DUP  | PGPC-0050 |
|   | 11 | 107461001 | 107462000 DUP | PGPC-0050 |
|   | 16 | 33864001  | 33871000 DUP  | PGPC-0050 |
|   | 11 | 189001    | 196000 DUP    | PGPC-0050 |
|   | 9  | 68989001  | 69003000 DUP  | PGPC-0050 |
|   | 16 | 33864001  | 33902000 DUP  | PGPC-0050 |
|   | 4  | 175625189 | 175626992 DEL | HuRef     |
|   | 6  | 32499003  | 32500800 DEL  | HuRef     |
|   | 10 | 132988685 | 132991208 DEL | HuRef     |
|   | 7  | 104473087 | 104474345 DEL | HuRef     |
|   | 2  | 215728764 | 215730831 DEL | HuRef     |
|   | 10 | 66398775  | 66400744 DEL  | HuRef     |
|   | 6  | 134589702 | 134594730 DEL | HuRef     |
|   | 19 | 54800858  | 54807620 DEL  | HuRef     |
|   | 2  | 194689503 | 194698765 DEL | HuRef     |
|   | 3  | 146385193 | 146394861 DEL | HuRef     |
|   | 5  | 83947971  | 83955250 DEL  | HuRef     |
|   | 12 | 131730201 | 131828839 DEL | HuRef     |
|   | 14 | 90911001  | 90912000 DUP  | HuRef     |
|   | 4  | 99814001  | 99817000 DUP  | HuRef     |
|   | 5  | 21543001  | 21545000 DUP  | HuRef     |
|   | 1  | 31904001  | 31905000 DUP  | HuRef     |
|   | 10 | 134177001 | 134178000 DUP | HuRef     |
|   | 16 | 16726001  | 16731000 DUP  | HuRef     |
|   | 11 | 189001    | 196000 DUP    | HuRef     |
|   | 8  | 43631001  | 43636000 DUP  | HuRef     |
| Y |    | 22274001  | 22282000 DUP  | HuRef     |
|   | 1  | 206283001 | 206288000 DUP | HuRef     |
|   | 17 | 22244001  | 22263000 DUP  | HuRef     |
|   | 4  | 3573001   | 3596000 DUP   | HuRef     |
| Y |    | 28791001  | 28819000 DUP  | HuRef     |
|   | 8  | 43819001  | 43838000 DUP  | HuRef     |
|   | 10 | 46947001  | 47151000 DUP  | HuRef     |

**Detected in this sample...but not this sample TRUE/FALSE**

|      |      |       |
|------|------|-------|
| S_WE | S_NE | TRUE  |
| S_WE | S_NE | TRUE  |
| S_WE | S_NE | TRUE  |
| S_NE | S_WE | TRUE  |
| S_NE | S_WE | FALSE |
| S_NE | S_WE | TRUE  |
| S_WE | S_NE | TRUE  |
| S_WE | S_NE | TRUE  |
| S_WE | S_NE | TRUE  |
| S_NE | S_WE | TRUE  |
| S_NE | S_WE | TRUE  |
| S_NE | S_WE | TRUE  |
| S_WE | S_NE | FALSE |
| S_WE | S_NE | FALSE |
| S_NE | S_WE | TRUE  |
| S_NE | S_WE | FALSE |
| S_NE | S_WE | TRUE  |
| S_WE | S_NE | FALSE |
| S_NE | S_WE | FALSE |
| S_NE | S_WE | FALSE |
| S_NE | S_WE | FALSE |
| S_WE | S_NE | FALSE |
| S_WE | S_NE | FALSE |
| S_WE | S_NE | FALSE |
| S_NE | S_WE | FALSE |
| S_NE | S_WE | FALSE |
| S_NE | S_WE | FALSE |
| B_WE | B_NE | TRUE  |
| B_WE | B_NE | TRUE  |
| B_NE | B_WE | TRUE  |
| B_NE | B_WE | TRUE  |
| B_NE | B_WE | TRUE  |
| B_WE | B_NE | TRUE  |
| B_WE | B_NE | TRUE  |
| B_WE | B_NE | TRUE  |
| B_NE | B_WE | FALSE |
| B_NE | B_WE | TRUE  |
| B_NE | B_WE | FALSE |

|       |       |       |
|-------|-------|-------|
| B_NE  | B_WE  | FALSE |
| B_NE  | B_WE  | FALSE |
| B_WE  | B_NE  | TRUE  |
| B_NE  | B_WE  | FALSE |
| B_NE  | B_WE  | TRUE  |
| B_NE  | B_WE  | FALSE |
| B_WE  | B_NE  | FALSE |
| B_WE  | B_NE  | FALSE |
| B_WE  | B_NE  | FALSE |
| B_NE  | B_WE  | FALSE |
| B_NE  | B_WE  | TRUE  |
| B_NE  | B_WE  | FALSE |
| Blood | S_NE  | TRUE  |
| Blood | S_NE  | TRUE  |
| Blood | S_NE  | TRUE  |
| S_NE  | Blood | TRUE  |
| S_NE  | Blood | TRUE  |
| S_NE  | Blood | TRUE  |
| Blood | S_NE  | TRUE  |
| Blood | S_NE  | TRUE  |
| Blood | S_NE  | TRUE  |
| S_NE  | Blood | TRUE  |
| S_NE  | Blood | TRUE  |
| S_NE  | Blood | TRUE  |
| Blood | S_NE  | TRUE  |
| S_NE  | Blood | FALSE |
| S_NE  | Blood | FALSE |
| S_NE  | Blood | TRUE  |
| Blood | S_NE  | FALSE |
| S_NE  | Blood | FALSE |
| S_NE  | Blood | FALSE |
| S_NE  | Blood | FALSE |
| Blood | B_NE  | TRUE  |
| Blood | B_NE  | TRUE  |
| Blood | B_NE  | TRUE  |
| B_NE  | Blood | TRUE  |
| B_NE  | Blood | TRUE  |
| B_NE  | Blood | TRUE  |
| Blood | B_NE  | TRUE  |

|       |       |       |
|-------|-------|-------|
| Blood | B_NE  | TRUE  |
| Blood | B_NE  | TRUE  |
| B_NE  | Blood | TRUE  |
| Blood | B_NE  | TRUE  |
| Blood | B_NE  | TRUE  |
| B_NE  | Blood | FALSE |
| B_NE  | Blood | TRUE  |
| B_NE  | Blood | TRUE  |
| Blood | B_NE  | FALSE |
| Blood | B_NE  | FALSE |
| Blood | B_NE  | TRUE  |
| B_NE  | Blood | FALSE |
| B_NE  | Blood | TRUE  |
| B_NE  | Blood | FALSE |
| Blood | B_NE  | TRUE  |
| Blood | B_NE  | TRUE  |
| B_NE  | Blood | FALSE |
| Blood | B_NE  | FALSE |
| Blood | B_NE  | FALSE |
| B_NE  | Blood | FALSE |
| B_NE  | Blood | FALSE |
| B_NE  | Blood | FALSE |
| S_WE  | S_NE  | TRUE  |
| S_WE  | S_NE  | TRUE  |
| S_WE  | S_NE  | TRUE  |
| S_NE  | S_WE  | TRUE  |
| S_NE  | S_WE  | TRUE  |
| S_NE  | S_WE  | TRUE  |
| S_WE  | S_NE  | TRUE  |
| S_WE  | S_NE  | TRUE  |
| S_WE  | S_NE  | TRUE  |
| S_NE  | S_WE  | TRUE  |
| S_NE  | S_WE  | TRUE  |
| S_NE  | S_WE  | TRUE  |
| S_WE  | S_NE  | TRUE  |
| S_WE  | S_NE  | TRUE  |
| S_WE  | S_NE  | TRUE  |
| S_NE  | S_WE  | TRUE  |
| S_NE  | S_WE  | TRUE  |
| S_WE  | S_NE  | FALSE |
| S_WE  | S_NE  | TRUE  |
| S_NE  | S_WE  | FALSE |
| S_NE  | S_WE  | FALSE |
| S_NE  | S_WE  | FALSE |
| S_WE  | S_NE  | TRUE  |
| S_WE  | S_NE  | TRUE  |

|       |       |       |
|-------|-------|-------|
| S_NE  | S_WE  | TRUE  |
| S_NE  | S_WE  | FALSE |
| S_NE  | S_WE  | TRUE  |
| S_WE  | S_NE  | FALSE |
| S_WE  | S_NE  | FALSE |
| S_WE  | S_NE  | FALSE |
| S_NE  | S_WE  | FALSE |
| S_NE  | S_WE  | FALSE |
| S_NE  | S_WE  | FALSE |
| B_WE  | B_NE  | TRUE  |
| B_WE  | B_NE  | TRUE  |
| B_WE  | B_NE  | TRUE  |
| B_NE  | B_WE  | TRUE  |
| B_NE  | B_WE  | TRUE  |
| B_NE  | B_WE  | TRUE  |
| B_WE  | B_NE  | FALSE |
| B_WE  | B_NE  | TRUE  |
| B_NE  | B_WE  | TRUE  |
| B_NE  | B_WE  | TRUE  |
| B_NE  | B_WE  | TRUE  |
| B_WE  | B_NE  | FALSE |
| B_WE  | B_NE  | TRUE  |
| B_WE  | B_NE  | FALSE |
| B_NE  | B_WE  | TRUE  |
| B_NE  | B_WE  | TRUE  |
| B_NE  | B_WE  | TRUE  |
| B_WE  | B_NE  | FALSE |
| B_NE  | B_WE  | TRUE  |
| B_NE  | B_WE  | FALSE |
| B_NE  | B_WE  | TRUE  |
| B_WE  | B_NE  | FALSE |
| B_WE  | B_NE  | FALSE |
| B_WE  | B_NE  | FALSE |
| B_NE  | B_WE  | FALSE |
| B_NE  | B_WE  | FALSE |
| B_NE  | B_WE  | TRUE  |
| Blood | S_NE  | TRUE  |
| Blood | S_NE  | TRUE  |
| Blood | S_NE  | TRUE  |
| S_NE  | Blood | TRUE  |
| S_NE  | Blood | TRUE  |
| S_NE  | Blood | TRUE  |
| Blood | S_NE  | TRUE  |

|       |       |       |
|-------|-------|-------|
| Blood | S_NE  | TRUE  |
| Blood | S_NE  | TRUE  |
| S_NE  | Blood | TRUE  |
| Blood | S_NE  | TRUE  |
| Blood | S_NE  | TRUE  |
| Blood | S_NE  | TRUE  |
| S_NE  | Blood | TRUE  |
| S_NE  | Blood | TRUE  |
| Blood | S_NE  | FALSE |
| Blood | S_NE  | FALSE |
| Blood | S_NE  | TRUE  |
| S_NE  | Blood | FALSE |
| S_NE  | Blood | FALSE |
| S_NE  | Blood | TRUE  |
| Blood | S_NE  | TRUE  |
| S_NE  | Blood | FALSE |
| Blood | B_NE  | TRUE  |
| Blood | B_NE  | TRUE  |
| Blood | B_NE  | TRUE  |
| B_NE  | Blood | TRUE  |
| B_NE  | Blood | TRUE  |
| B_NE  | Blood | TRUE  |
| Blood | B_NE  | TRUE  |
| Blood | B_NE  | TRUE  |
| Blood | B_NE  | TRUE  |
| B_NE  | Blood | TRUE  |
| Blood | B_NE  | TRUE  |
| Blood | B_NE  | TRUE  |
| Blood | B_NE  | TRUE  |
| B_NE  | Blood | TRUE  |
| B_NE  | Blood | TRUE  |
| Blood | B_NE  | FALSE |
| Blood | B_NE  | FALSE |
| B_NE  | Blood | FALSE |
| B_NE  | Blood | FALSE |
| S_WE  | S_NE  | TRUE  |
| S_WE  | S_NE  | TRUE  |
| S_WE  | S_NE  | TRUE  |
| S_NE  | S_WE  | TRUE  |
| S_NE  | S_WE  | TRUE  |
| S_NE  | S_WE  | TRUE  |
| S_WE  | S_NE  | TRUE  |
| S_WE  | S_NE  | TRUE  |
| S_WE  | S_NE  | TRUE  |
| S_NE  | S_WE  | TRUE  |
| S_NE  | S_WE  | TRUE  |
| S_NE  | S_WE  | TRUE  |
| S_WE  | S_NE  | TRUE  |

|       |      |       |
|-------|------|-------|
| S_WE  | S_NE | TRUE  |
| S_NE  | S_WE | TRUE  |
| S_NE  | S_WE | FALSE |
| S_WE  | S_NE | FALSE |
| S_NE  | S_WE | FALSE |
| S_NE  | S_WE | FALSE |
| S_NE  | S_WE | FALSE |
| S_WE  | S_NE | FALSE |
| S_WE  | S_NE | FALSE |
| S_WE  | S_NE | FALSE |
| S_NE  | S_WE | TRUE  |
| S_NE  | S_WE | TRUE  |
| S_WE  | S_NE | FALSE |
| S_WE  | S_NE | FALSE |
| S_WE  | S_NE | FALSE |
| S_NE  | S_WE | FALSE |
| S_NE  | S_WE | FALSE |
| S_NE  | S_WE | TRUE  |
| B_WE  | B_NE | TRUE  |
| B_WE  | B_NE | TRUE  |
| B_WE  | B_NE | TRUE  |
| B_NE  | B_WE | TRUE  |
| Blood | S_NE | TRUE  |
| Blood | S_NE | TRUE  |
| Blood | S_NE | TRUE  |



|       |       |       |
|-------|-------|-------|
| S_NE  | Blood | TRUE  |
| S_NE  | Blood | TRUE  |
| S_NE  | Blood | TRUE  |
| Blood | S_NE  | TRUE  |
| Blood | S_NE  | TRUE  |
| Blood | S_NE  | TRUE  |
| S_NE  | Blood | TRUE  |
| S_NE  | Blood | TRUE  |
| S_NE  | Blood | TRUE  |
| Blood | S_NE  | TRUE  |
| Blood | S_NE  | TRUE  |
| Blood | S_NE  | FALSE |
| Blood | S_NE  | FALSE |
| Blood | S_NE  | TRUE  |
| S_NE  | Blood | TRUE  |
| S_NE  | Blood | FALSE |
| S_NE  | Blood | TRUE  |
| Blood | S_NE  | TRUE  |
| Blood | S_NE  | TRUE  |
| Blood | S_NE  | FALSE |
| S_NE  | Blood | FALSE |
| Blood | S_NE  | TRUE  |
| Blood | S_NE  | FALSE |
| S_NE  | Blood | FALSE |
| Blood | B_NE  | TRUE  |
| Blood | B_NE  | TRUE  |
| Blood | B_NE  | TRUE  |
| B_NE  | Blood | TRUE  |
| B_NE  | Blood | TRUE  |
| Blood | B_NE  | TRUE  |
| Blood | B_NE  | TRUE  |
| B_NE  | Blood | TRUE  |
| Blood | B_NE  | TRUE  |
| B_NE  | Blood | TRUE  |
| Blood | B_NE  | FALSE |
| B_NE  | Blood | TRUE  |
| B_NE  | Blood | FALSE |
| B_NE  | Blood | TRUE  |
| Blood | B_NE  | TRUE  |
| B_NE  | Blood | FALSE |
| B_NE  | Blood | FALSE |
| S_WE  | S_NE  | TRUE  |
| S_NE  | S_WE  | TRUE  |
| S_NE  | S_WE  | TRUE  |

|      |      |       |
|------|------|-------|
| S_NE | S_WE | TRUE  |
| S_WE | S_NE | TRUE  |
| S_WE | S_NE | TRUE  |
| S_WE | S_NE | TRUE  |
| S_NE | S_WE | FALSE |
| S_NE | S_WE | TRUE  |
| S_NE | S_WE | TRUE  |
| S_NE | S_WE | TRUE  |
| S_WE | S_NE | FALSE |
| S_WE | S_NE | FALSE |
| S_WE | S_NE | FALSE |
| S_NE | S_WE | TRUE  |
| S_NE | S_WE | TRUE  |
| S_NE | S_WE | TRUE  |
| B_WE | B_NE | TRUE  |
| B_WE | B_NE | TRUE  |
| B_WE | B_NE | TRUE  |
| B_NE | B_WE | TRUE  |
| B_NE | B_WE | TRUE  |
| B_NE | B_WE | TRUE  |
| B_WE | B_NE | TRUE  |
| B_NE | B_WE | TRUE  |
| B_NE | B_WE | TRUE  |
| B_NE | B_WE | TRUE  |
| B_WE | B_NE | FALSE |
| B_WE | B_NE | FALSE |
| B_WE | B_NE | FALSE |
| B_NE | B_WE | TRUE  |
| B_NE | B_WE | FALSE |
| B_NE | B_WE | TRUE  |
| B_NE | B_WE | FALSE |
| B_WE | B_NE | FALSE |
| B_WE | B_NE | FALSE |

|       |       |       |
|-------|-------|-------|
| B_WE  | B_NE  | FALSE |
| B_NE  | B_WE  | TRUE  |
| B_NE  | B_WE  | FALSE |
| B_NE  | B_WE  | FALSE |
| Blood | S_NE  | TRUE  |
| Blood | S_NE  | TRUE  |
| Blood | S_NE  | TRUE  |
| S_NE  | Blood | TRUE  |
| S_NE  | Blood | TRUE  |
| S_NE  | Blood | TRUE  |
| Blood | S_NE  | TRUE  |
| Blood | S_NE  | TRUE  |
| Blood | S_NE  | TRUE  |
| S_NE  | Blood | TRUE  |
| S_NE  | Blood | TRUE  |
| Blood | S_NE  | FALSE |
| Blood | S_NE  | TRUE  |
| Blood | S_NE  | FALSE |
| S_NE  | Blood | FALSE |
| S_NE  | Blood | FALSE |
| Blood | S_NE  | TRUE  |
| Blood | S_NE  | TRUE  |
| Blood | S_NE  | FALSE |
| S_NE  | Blood | FALSE |
| S_NE  | Blood | FALSE |
| S_NE  | Blood | FALSE |
| Blood | B_NE  | TRUE  |
| Blood | B_NE  | TRUE  |
| Blood | B_NE  | TRUE  |
| B_NE  | Blood | TRUE  |
| B_NE  | Blood | TRUE  |
| B_NE  | Blood | TRUE  |
| Blood | B_NE  | TRUE  |
| Blood | B_NE  | TRUE  |
| Blood | B_NE  | TRUE  |
| B_NE  | Blood | TRUE  |
| B_NE  | Blood | TRUE  |
| B_NE  | Blood | TRUE  |
| Blood | B_NE  | TRUE  |
| Blood | B_NE  | TRUE  |

|        |        |       |
|--------|--------|-------|
| B_NE   | Blood  | TRUE  |
| Blood  | B_NE   | FALSE |
| Blood  | B_NE   | FALSE |
| Blood  | B_NE   | TRUE  |
| B_NE   | Blood  | FALSE |
| B_NE   | Blood  | FALSE |
| B_NE   | Blood  | FALSE |
| Blood  | B_NE   | FALSE |
| B_NE   | Blood  | FALSE |
| B_NE   | Blood  | FALSE |
| Blood1 | Blood2 | TRUE  |
| Blood1 | Blood2 | TRUE  |
| Blood1 | Blood2 | TRUE  |
| Blood2 | Blood1 | FALSE |
| Blood2 | Blood1 | TRUE  |
| Blood2 | Blood1 | TRUE  |
| Blood1 | Blood2 | TRUE  |
| Blood1 | Blood2 | TRUE  |
| Blood1 | Blood2 | TRUE  |
| Blood2 | Blood1 | TRUE  |
| Blood2 | Blood1 | TRUE  |
| Blood2 | Blood1 | TRUE  |
| Blood1 | Blood2 | FALSE |
| Blood1 | Blood2 | TRUE  |
| Blood2 | Blood1 | TRUE  |
| Blood2 | Blood1 | FALSE |
| Blood2 | Blood1 | FALSE |
| Blood1 | Blood2 | TRUE  |
| Blood1 | Blood2 | FALSE |
| Blood1 | Blood2 | TRUE  |
| Blood2 | Blood1 | FALSE |
| Blood2 | Blood1 | TRUE  |
| Blood1 | Blood2 | FALSE |
| Blood1 | Blood2 | FALSE |
| Blood2 | Blood1 | FALSE |
| Blood2 | Blood1 | FALSE |
| Blood2 | Blood1 | FALSE |

| Chr | Start     | End       | Variant type | Individual |
|-----|-----------|-----------|--------------|------------|
| 5   | 158178256 | 158181019 | DEL          | HuRef      |
| 5   | 8591596   | 8598031   | DEL          | PGPC-0002  |
| 13  | 38844063  | 38847693  | DEL          | PGPC-0002  |
| 17  | 49387920  | 49390776  | DEL          | PGPC-0002  |
| 2   | 114149861 | 114166341 | DEL          | PGPC-0002  |
| 5   | 70980168  | 70983231  | DEL          | PGPC-0002  |
| 12  | 34601001  | 34612000  | DUP          | PGPC-0002  |
| 16  | 296439    | 299962    | DEL          | PGPC-0002  |
| 19  | 32290104  | 32292999  | DEL          | PGPC-0002  |
| 1   | 87028215  | 87039286  | DEL          | PGPC-0002  |
| 2   | 4116793   | 4125902   | DEL          | PGPC-0002  |
| 5   | 3957860   | 3970713   | DEL          | PGPC-0002  |
| 11  | 8958050   | 8965128   | DEL          | PGPC-0002  |
| 17  | 70734001  | 70736000  | DUP          | PGPC-0002  |
| 19  | 32691001  | 32707000  | DUP          | PGPC-0002  |
| 5   | 8591596   | 8598031   | DEL          | PGPC-0002  |
| 13  | 38844063  | 38847693  | DEL          | PGPC-0002  |
| 17  | 49387920  | 49390776  | DEL          | PGPC-0002  |
| 2   | 114149861 | 114166341 | DEL          | PGPC-0002  |
| 5   | 70980168  | 70983231  | DEL          | PGPC-0002  |
| 12  | 34601001  | 34612000  | DUP          | PGPC-0002  |
| 16  | 296439    | 299962    | DEL          | PGPC-0002  |
| 19  | 32290104  | 32292999  | DEL          | PGPC-0002  |
| 5   | 70980168  | 70983231  | DEL          | PGPC-0002  |
| 19  | 32290104  | 32292999  | DEL          | PGPC-0002  |
| 2   | 114149861 | 114166341 | DEL          | PGPC-0002  |
| 12  | 34601001  | 34612000  | DUP          | PGPC-0002  |
| 16  | 296439    | 299962    | DEL          | PGPC-0002  |
| 19  | 32290104  | 32292999  | DEL          | PGPC-0002  |
| 2   | 74788001  | 74789000  | DUP          | PGPC-0002  |
| 4   | 7182374   | 7187467   | DEL          | PGPC-0002  |
| 1   | 87028215  | 87039286  | DEL          | PGPC-0002  |
| 2   | 4116793   | 4125902   | DEL          | PGPC-0002  |
| 5   | 3957860   | 3970713   | DEL          | PGPC-0002  |
| 11  | 8958050   | 8965128   | DEL          | PGPC-0002  |
| 17  | 70734001  | 70736000  | DUP          | PGPC-0002  |
| 19  | 32693001  | 32707000  | DUP          | PGPC-0002  |
| 2   | 74788001  | 74789000  | DUP          | PGPC-0002  |
| 4   | 7182374   | 7187467   | DEL          | PGPC-0002  |
| 4   | 112358205 | 112374964 | DEL          | PGPC-0002  |
| 4   | 190613001 | 190685000 | DUP          | PGPC-0002  |
| 6   | 57238001  | 57495000  | DUP          | PGPC-0002  |
| 7   | 61727001  | 61803000  | DUP          | PGPC-0002  |
| 4   | 112358205 | 112374964 | DEL          | PGPC-0002  |
| 4   | 190613001 | 190685000 | DUP          | PGPC-0002  |

|    |           |               |           |
|----|-----------|---------------|-----------|
| 6  | 57238001  | 57495000 DUP  | PGPC-0002 |
| 7  | 61727001  | 61803000 DUP  | PGPC-0002 |
| 1  | 10254789  | 10257439 DEL  | PGPC-0002 |
| 2  | 114150115 | 114166341 DEL | PGPC-0002 |
| 12 | 34600001  | 34612000 DUP  | PGPC-0002 |
| 16 | 296343    | 299969 DEL    | PGPC-0002 |
| 1  | 10254789  | 10257439 DEL  | PGPC-0002 |
| 7  | 16436001  | 16441000 DUP  | PGPC-0002 |
| 5  | 70980168  | 70983231 DEL  | PGPC-0002 |
| 7  | 16436001  | 16441000 DUP  | PGPC-0002 |
| 3  | 110792780 | 110796433 DEL | PGPC-0005 |
| 4  | 21603740  | 21606207 DEL  | PGPC-0005 |
| 2  | 55868336  | 55884436 DEL  | PGPC-0005 |
| 7  | 113652646 | 113659265 DEL | PGPC-0005 |
| 12 | 21565263  | 21586521 DEL  | PGPC-0005 |
| 1  | 10543609  | 10545994 DEL  | PGPC-0005 |
| 2  | 191995082 | 191998655 DEL | PGPC-0005 |
| 12 | 38272742  | 38275685 DEL  | PGPC-0005 |
| 16 | 7184783   | 7188930 DEL   | PGPC-0005 |
| 3  | 110792780 | 110796433 DEL | PGPC-0005 |
| 4  | 21603740  | 21606207 DEL  | PGPC-0005 |
| 16 | 4134253   | 4141123 DEL   | PGPC-0005 |
| 2  | 191995082 | 191998655 DEL | PGPC-0005 |
| 16 | 7184783   | 7188930 DEL   | PGPC-0005 |
| 3  | 110792780 | 110796433 DEL | PGPC-0005 |
| 4  | 21603740  | 21606207 DEL  | PGPC-0005 |
| 1  | 10543609  | 10545994 DEL  | PGPC-0005 |
| 12 | 38272742  | 38275685 DEL  | PGPC-0005 |
| 3  | 110792780 | 110796433 DEL | PGPC-0005 |
| 4  | 21603740  | 21606207 DEL  | PGPC-0005 |
| 7  | 158064190 | 158072142 DEL | PGPC-0005 |
| 19 | 4691706   | 4694131 DEL   | PGPC-0005 |
| 13 | 112832001 | 112833000 DUP | PGPC-0005 |
| 2  | 55868336  | 55884436 DEL  | PGPC-0005 |
| 7  | 113652646 | 113659265 DEL | PGPC-0005 |
| 12 | 21565263  | 21586521 DEL  | PGPC-0005 |
| 1  | 10543591  | 10545994 DEL  | PGPC-0005 |
| 2  | 191995082 | 191998655 DEL | PGPC-0005 |
| 12 | 38272689  | 38275607 DEL  | PGPC-0005 |
| 16 | 7184783   | 7189177 DEL   | PGPC-0005 |
| 7  | 158064190 | 158072142 DEL | PGPC-0005 |
| 19 | 4691706   | 4694131 DEL   | PGPC-0005 |
| 13 | 112832001 | 112833000 DUP | PGPC-0005 |
| 1  | 68984001  | 69045600 DEL  | PGPC-0005 |
| 2  | 139748401 | 139813800 DEL | PGPC-0005 |
| 2  | 199811601 | 199865200 DEL | PGPC-0005 |

|    |           |               |           |
|----|-----------|---------------|-----------|
| 4  | 190612001 | 190685000 DUP | PGPC-0005 |
| 6  | 48595001  | 48648000 DEL  | PGPC-0005 |
| 6  | 78194401  | 78244800 DEL  | PGPC-0005 |
| 1  | 68984001  | 69045600 DEL  | PGPC-0005 |
| 2  | 139748401 | 139813800 DEL | PGPC-0005 |
| 2  | 199811601 | 199865200 DEL | PGPC-0005 |
| 4  | 190612001 | 190685000 DUP | PGPC-0005 |
| 6  | 48595001  | 48648000 DEL  | PGPC-0005 |
| 6  | 78194401  | 78244800 DEL  | PGPC-0005 |
| 19 | 4691767   | 4694131 DEL   | PGPC-0005 |
| 6  | 32638080  | 32641424 DEL  | PGPC-0005 |
| 1  | 10543593  | 10546416 DEL  | PGPC-0005 |
| 12 | 38272742  | 38275654 DEL  | PGPC-0005 |
| 19 | 4691767   | 4694131 DEL   | PGPC-0005 |
| 6  | 32638080  | 32641424 DEL  | PGPC-0005 |
| 7  | 158064190 | 158072142 DEL | PGPC-0005 |
| 7  | 16436001  | 16441000 DUP  | PGPC-0005 |
| 7  | 61727001  | 61917000 DUP  | PGPC-0005 |
| 16 | 4134253   | 4141140 DEL   | PGPC-0005 |
| 2  | 191994967 | 191998655 DEL | PGPC-0005 |
| 16 | 7184783   | 7188930 DEL   | PGPC-0005 |
| 7  | 158064190 | 158072142 DEL | PGPC-0005 |
| 7  | 16436001  | 16441000 DUP  | PGPC-0005 |
| 7  | 61727001  | 61917000 DUP  | PGPC-0005 |
| 5  | 49540770  | 49543755 DEL  | PGPC-0006 |
| 2  | 183370001 | 183372000 DUP | PGPC-0006 |
| 4  | 122733001 | 122740000 DUP | PGPC-0006 |
| 2  | 100518352 | 100524837 DEL | PGPC-0006 |
| 3  | 22128135  | 22151837 DEL  | PGPC-0006 |
| 3  | 191653519 | 191666161 DEL | PGPC-0006 |
| 5  | 120855331 | 120863315 DEL | PGPC-0006 |
| 10 | 35248437  | 35255022 DEL  | PGPC-0006 |
| 12 | 73339881  | 73346117 DEL  | PGPC-0006 |
| 15 | 31355205  | 31391647 DEL  | PGPC-0006 |
| 3  | 110792780 | 110796433 DEL | PGPC-0006 |
| 9  | 28561749  | 28565449 DEL  | PGPC-0006 |
| 16 | 50627525  | 50630432 DEL  | PGPC-0006 |
| 5  | 49540770  | 49543755 DEL  | PGPC-0006 |
| 16 | 85487001  | 85492000 DUP  | PGPC-0006 |
| 2  | 183370001 | 183372000 DUP | PGPC-0006 |
| 4  | 122733001 | 122740000 DUP | PGPC-0006 |
| 16 | 50627525  | 50630432 DEL  | PGPC-0006 |
| 5  | 49540770  | 49543755 DEL  | PGPC-0006 |
| 16 | 85487001  | 85492000 DUP  | PGPC-0006 |
| 2  | 183370001 | 183372000 DUP | PGPC-0006 |
| 4  | 122733001 | 122740000 DUP | PGPC-0006 |

|   |    |           |               |           |
|---|----|-----------|---------------|-----------|
|   | 3  | 110792780 | 110796433 DEL | PGPC-0006 |
|   | 9  | 28561749  | 28565449 DEL  | PGPC-0006 |
|   | 16 | 85487001  | 85492000 DUP  | PGPC-0006 |
|   | 2  | 183370001 | 183372000 DUP | PGPC-0006 |
|   | 4  | 122733001 | 122740000 DUP | PGPC-0006 |
|   | 1  | 55488259  | 55493741 DEL  | PGPC-0006 |
|   | 2  | 221410001 | 221412000 DUP | PGPC-0006 |
|   | 5  | 126583001 | 126584000 DUP | PGPC-0006 |
|   | 2  | 100518352 | 100524837 DEL | PGPC-0006 |
|   | 3  | 22128161  | 22151900 DEL  | PGPC-0006 |
|   | 3  | 191653519 | 191666161 DEL | PGPC-0006 |
|   | 5  | 120855331 | 120863315 DEL | PGPC-0006 |
|   | 10 | 35248437  | 35255022 DEL  | PGPC-0006 |
|   | 12 | 73339881  | 73346117 DEL  | PGPC-0006 |
|   | 15 | 31355205  | 31391647 DEL  | PGPC-0006 |
|   | 3  | 110792780 | 110796433 DEL | PGPC-0006 |
|   | 9  | 28561749  | 28565618 DEL  | PGPC-0006 |
|   | 16 | 50627525  | 50630432 DEL  | PGPC-0006 |
|   | 16 | 85488001  | 85491000 DUP  | PGPC-0006 |
|   | 1  | 55488259  | 55493741 DEL  | PGPC-0006 |
|   | 2  | 221410001 | 221412000 DUP | PGPC-0006 |
|   | 5  | 126583001 | 126584000 DUP | PGPC-0006 |
|   | 6  | 57239001  | 57490000 DUP  | PGPC-0006 |
|   | 8  | 58105001  | 58127000 DUP  | PGPC-0006 |
|   | 16 | 85645920  | 85651202 DEL  | PGPC-0006 |
| X |    | 93895601  | 93950600 DEL  | PGPC-0006 |
|   | 6  | 57239001  | 57490000 DUP  | PGPC-0006 |
|   | 8  | 58105001  | 58127000 DUP  | PGPC-0006 |
|   | 16 | 85645920  | 85651202 DEL  | PGPC-0006 |
| X |    | 93895601  | 93950600 DEL  | PGPC-0006 |
|   | 1  | 96139978  | 96142391 DEL  | PGPC-0006 |
|   | 2  | 184392666 | 184396055 DEL | PGPC-0006 |
|   | 6  | 113411779 | 113414732 DEL | PGPC-0006 |
|   | 3  | 110792780 | 110796191 DEL | PGPC-0006 |
|   | 9  | 28561749  | 28565449 DEL  | PGPC-0006 |
|   | 2  | 184392666 | 184396055 DEL | PGPC-0006 |
|   | 6  | 113411779 | 113414732 DEL | PGPC-0006 |
|   | 1  | 96139978  | 96142391 DEL  | PGPC-0006 |
|   | 7  | 16436001  | 16440000 DUP  | PGPC-0006 |
|   | 13 | 56275201  | 56336600 DEL  | PGPC-0006 |
|   | 16 | 381523    | 384914 DEL    | PGPC-0006 |
| X |    | 103951601 | 104029600 DEL | PGPC-0006 |
|   | 16 | 50627525  | 50630432 DEL  | PGPC-0006 |
|   | 5  | 49540791  | 49543731 DEL  | PGPC-0006 |
|   | 7  | 16436001  | 16440000 DUP  | PGPC-0006 |
|   | 13 | 56275201  | 56336600 DEL  | PGPC-0006 |



|   |    |           |               |           |
|---|----|-----------|---------------|-----------|
|   | 16 | 381523    | 384914 DEL    | PGPC-0006 |
| X |    | 103951601 | 104029600 DEL | PGPC-0006 |
|   | 2  | 76800861  | 76806656 DEL  | PGPC-0050 |
|   | 7  | 42495716  | 42498508 DEL  | PGPC-0050 |
|   | 11 | 54695001  | 54705000 DUP  | PGPC-0050 |
|   | 1  | 6799054   | 6808361 DEL   | PGPC-0050 |
|   | 3  | 191653519 | 191666161 DEL | PGPC-0050 |
|   | 5  | 126311001 | 126316000 DUP | PGPC-0050 |
|   | 11 | 124075171 | 124079804 DEL | PGPC-0050 |
|   | 12 | 37996803  | 38002023 DEL  | PGPC-0050 |
|   | 2  | 76800861  | 76806656 DEL  | PGPC-0050 |
|   | 8  | 50069940  | 50072482 DEL  | PGPC-0050 |
|   | 18 | 33666788  | 33669276 DEL  | PGPC-0050 |
|   | 7  | 42495716  | 42498508 DEL  | PGPC-0050 |
|   | 11 | 54695001  | 54705000 DUP  | PGPC-0050 |
|   | 1  | 2545253   | 2549934 DEL   | PGPC-0050 |
|   | 4  | 33378224  | 33386471 DEL  | PGPC-0050 |
|   | 8  | 50069940  | 50072482 DEL  | PGPC-0050 |
|   | 18 | 33666788  | 33669276 DEL  | PGPC-0050 |
|   | 7  | 42495716  | 42498508 DEL  | PGPC-0050 |
|   | 11 | 54695001  | 54705000 DUP  | PGPC-0050 |
|   | 5  | 53353001  | 53367000 DUP  | PGPC-0050 |
|   | 7  | 115978393 | 115987027 DEL | PGPC-0050 |
|   | 8  | 25555762  | 25588938 DEL  | PGPC-0050 |
|   | 10 | 73225980  | 73232033 DEL  | PGPC-0050 |
|   | 10 | 96322766  | 96328948 DEL  | PGPC-0050 |
|   | 16 | 66494001  | 66510000 DUP  | PGPC-0050 |
|   | 19 | 27760001  | 27770000 DUP  | PGPC-0050 |
|   | 1  | 2545253   | 2549934 DEL   | PGPC-0050 |
|   | 3  | 191653519 | 191666161 DEL | PGPC-0050 |
|   | 4  | 33378224  | 33386471 DEL  | PGPC-0050 |
|   | 5  | 126311001 | 126316000 DUP | PGPC-0050 |
|   | 11 | 124075171 | 124079804 DEL | PGPC-0050 |
|   | 12 | 37996803  | 38002023 DEL  | PGPC-0050 |
|   | 2  | 76800861  | 76806656 DEL  | PGPC-0050 |
|   | 8  | 50069940  | 50072482 DEL  | PGPC-0050 |
|   | 18 | 33666788  | 33669276 DEL  | PGPC-0050 |
|   | 7  | 42495716  | 42498508 DEL  | PGPC-0050 |
|   | 11 | 54695001  | 54705000 DUP  | PGPC-0050 |
|   | 3  | 94301567  | 94304344 DEL  | PGPC-0050 |
|   | 6  | 32501001  | 32505000 DUP  | PGPC-0050 |
|   | 7  | 46829824  | 46832391 DEL  | PGPC-0050 |
|   | 14 | 105628001 | 105629000 DUP | PGPC-0050 |
|   | 18 | 5972001   | 5973000 DUP   | PGPC-0050 |
|   | 1  | 6799054   | 6808361 DEL   | PGPC-0050 |
|   | 3  | 191653519 | 191666161 DEL | PGPC-0050 |

|    |           |               |           |
|----|-----------|---------------|-----------|
| 5  | 126311001 | 126316000 DUP | PGPC-0050 |
| 11 | 124075030 | 124079804 DEL | PGPC-0050 |
| 12 | 37996803  | 38002036 DEL  | PGPC-0050 |
| 8  | 50069940  | 50072482 DEL  | PGPC-0050 |
| 18 | 33666788  | 33669276 DEL  | PGPC-0050 |
| 3  | 94301567  | 94304344 DEL  | PGPC-0050 |
| 6  | 32501001  | 32505000 DUP  | PGPC-0050 |
| 7  | 46829824  | 46832391 DEL  | PGPC-0050 |
| 14 | 105628001 | 105629000 DUP | PGPC-0050 |
| 18 | 5972001   | 5973000 DUP   | PGPC-0050 |
| 11 | 48595801  | 48742400 DEL  | PGPC-0050 |
| 11 | 59120801  | 59174600 DEL  | PGPC-0050 |
| 11 | 87894601  | 87946200 DEL  | PGPC-0050 |
| 11 | 48595801  | 48742400 DEL  | PGPC-0050 |
| 11 | 59120801  | 59174600 DEL  | PGPC-0050 |
| 11 | 87894601  | 87946200 DEL  | PGPC-0050 |
| 12 | 57185325  | 57187467 DEL  | PGPC-0050 |
| 15 | 68549992  | 68551466 DEL  | PGPC-0050 |
| 19 | 27884001  | 27890000 DUP  | PGPC-0050 |
| 5  | 53352001  | 53368000 DUP  | PGPC-0050 |
| 7  | 115978393 | 115987027 DEL | PGPC-0050 |
| 8  | 25555772  | 25588938 DEL  | PGPC-0050 |
| 10 | 73225980  | 73232033 DEL  | PGPC-0050 |
| 10 | 96322766  | 96328948 DEL  | PGPC-0050 |
| 16 | 66495001  | 66510000 DUP  | PGPC-0050 |
| 19 | 27760001  | 27770000 DUP  | PGPC-0050 |
| 3  | 191653188 | 191666161 DEL | PGPC-0050 |
| 5  | 126311001 | 126316000 DUP | PGPC-0050 |
| 11 | 124075171 | 124079804 DEL | PGPC-0050 |
| 12 | 37996803  | 38002023 DEL  | PGPC-0050 |
| 2  | 76800905  | 76806804 DEL  | PGPC-0050 |
| 12 | 57185325  | 57187467 DEL  | PGPC-0050 |
| 15 | 68549992  | 68551466 DEL  | PGPC-0050 |
| 19 | 27884001  | 27890000 DUP  | PGPC-0050 |
| 7  | 61727001  | 61804000 DUP  | PGPC-0050 |
| 19 | 27732001  | 27770000 DUP  | PGPC-0050 |
| 7  | 61727001  | 61804000 DUP  | PGPC-0050 |
| 19 | 27732001  | 27770000 DUP  | PGPC-0050 |

**Detected in this sam... but not this sam TRUE/FALSE**

|        |        |       |
|--------|--------|-------|
| Blood1 | Blood2 | TRUE  |
| Blood  | B_NE   | TRUE  |
| Blood  | B_WE   | TRUE  |
| Blood  | B_WE   | FALSE |
| Blood  | B_WE   | TRUE  |
| Blood  | S_NE   | TRUE  |
| Blood  | S_NE   | TRUE  |
| Blood  | S_WE   | TRUE  |
| B_NE   | Blood  | FALSE |
| B_NE   | Blood  | TRUE  |
| B_NE   | B_WE   | TRUE  |
| B_NE   | B_WE   | FALSE |
| B_NE   | B_WE   | TRUE  |
| B_NE   | B_WE   | FALSE |
| B_NE   | B_WE   | TRUE  |
| B_WE   | Blood  | FALSE |
| B_WE   | B_NE   | FALSE |
| B_WE   | B_NE   | FALSE |

|       |       |       |
|-------|-------|-------|
| B_WE  | B_NE  | FALSE |
| B_WE  | B_NE  | FALSE |
| S_NE  | Blood | TRUE  |
| S_NE  | S_WE  | TRUE  |
| S_NE  | S_WE  | TRUE  |
| S_NE  | S_WE  | TRUE  |
| S_WE  | Blood | TRUE  |
| S_WE  | Blood | FALSE |
| S_WE  | S_NE  | TRUE  |
| S_WE  | S_NE  | FALSE |
| Blood | B_NE  | TRUE  |
| Blood | B_NE  | TRUE  |
| Blood | B_WE  | TRUE  |
| Blood | S_NE  | TRUE  |
| Blood | S_WE  | TRUE  |
| B_NE  | Blood | TRUE  |
| B_NE  | Blood | TRUE  |
| B_NE  | Blood | FALSE |
| B_NE  | B_WE  | TRUE  |
| B_NE  | B_WE  | FALSE |
| B_NE  | B_WE  | FALSE |
| B_WE  | Blood | FALSE |
| B_WE  | Blood | FALSE |
| B_WE  | Blood | FALSE |

|       |       |       |
|-------|-------|-------|
| B_WE  | Blood | FALSE |
| B_WE  | Blood | FALSE |
| B_WE  | Blood | FALSE |
| B_WE  | B_NE  | FALSE |
| S_NE  | Blood | TRUE  |
| S_NE  | Blood | FALSE |
| S_NE  | S_WE  | TRUE  |
| S_NE  | S_WE  | TRUE  |
| S_NE  | S_WE  | TRUE  |
| S_NE  | S_WE  | FALSE |
| S_WE  | Blood | TRUE  |
| S_WE  | Blood | FALSE |
| S_WE  | Blood | FALSE |
| S_WE  | S_NE  | TRUE  |
| S_WE  | S_NE  | FALSE |
| S_WE  | S_NE  | FALSE |
| Blood | B_NE  | TRUE  |
| Blood | B_NE  | TRUE  |
| Blood | B_NE  | TRUE  |
| Blood | B_WE  | TRUE  |
| Blood | S_NE  | TRUE  |

|       |       |       |
|-------|-------|-------|
| Blood | S_WE  | TRUE  |
| B_NE  | Blood | TRUE  |
| B_NE  | Blood | FALSE |
| B_NE  | Blood | FALSE |
| B_NE  | B_WE  | TRUE  |
| B_NE  | B_WE  | FALSE |
| B_NE  | B_WE  | FALSE |
| B_WE  | Blood | FALSE |
| B_WE  | B_NE  | FALSE |
| S_NE  | Blood | TRUE  |
| S_NE  | Blood | TRUE  |
| S_NE  | Blood | TRUE  |
| S_NE  | S_WE  | TRUE  |
| S_WE  | Blood | TRUE  |
| S_WE  | Blood | FALSE |
| S_WE  | Blood | FALSE |
| S_WE  | Blood | TRUE  |
| S_WE  | Blood | FALSE |
| S_WE  | S_NE  | TRUE  |
| S_WE  | S_NE  | TRUE  |
| S_WE  | S_NE  | FALSE |
| S_WE  | S_NE  | FALSE |



|      |       |       |
|------|-------|-------|
| B_NE | B_WE  | TRUE  |
| B_NE | B_WE  | FALSE |
| B_NE | B_WE  | TRUE  |
| B_NE | B_WE  | FALSE |
| B_NE | B_WE  | FALSE |
| B_WE | Blood | FALSE |
| B_WE | Blood | FALSE |
| B_WE | Blood | FALSE |
| B_WE | B_NE  | FALSE |
| B_WE | B_NE  | FALSE |
| B_WE | B_NE  | FALSE |
| S_NE | Blood | TRUE  |
| S_NE | Blood | TRUE  |
| S_NE | Blood | FALSE |
| S_NE | S_WE  | TRUE  |
| S_NE | S_WE  | FALSE |
| S_NE | S_WE  | FALSE |
| S_WE | Blood | FALSE |
| S_WE | Blood | FALSE |
| S_WE | S_NE  | FALSE |
| S_WE | S_NE  | FALSE |
